# Supplementary material for: Novel insights into factors associated with yield response and nutrient use efficiency of maize and rice in sub-Saharan Africa. A review
Source: Springer Nature journal article supplement (doi:10.1007/s13593-022-00821-4), 2022-08-22

**Yield\_IL**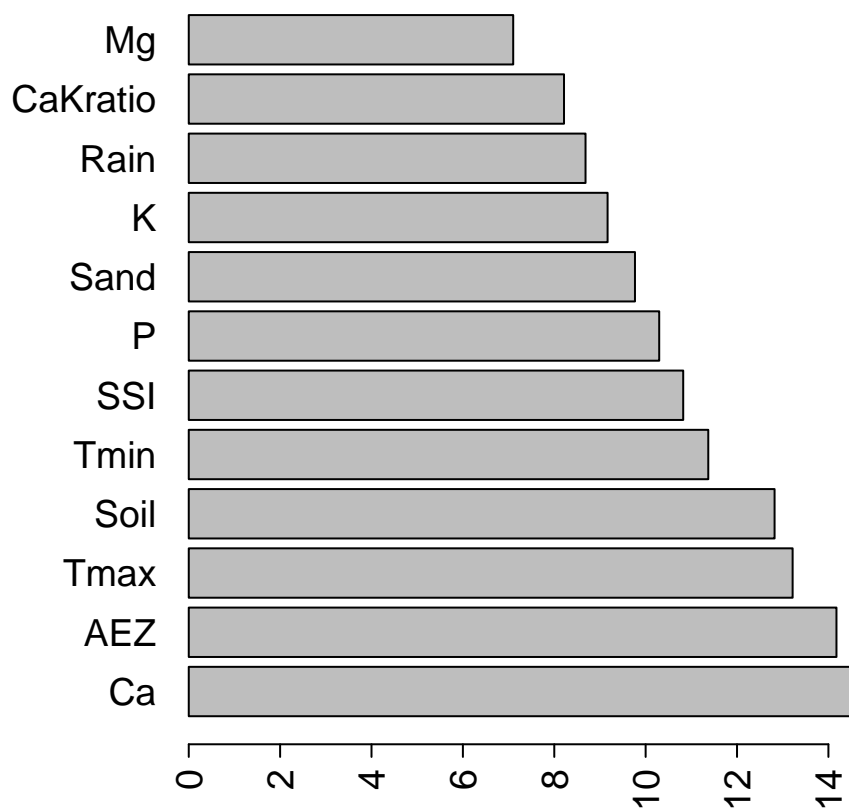**YRN\_IL**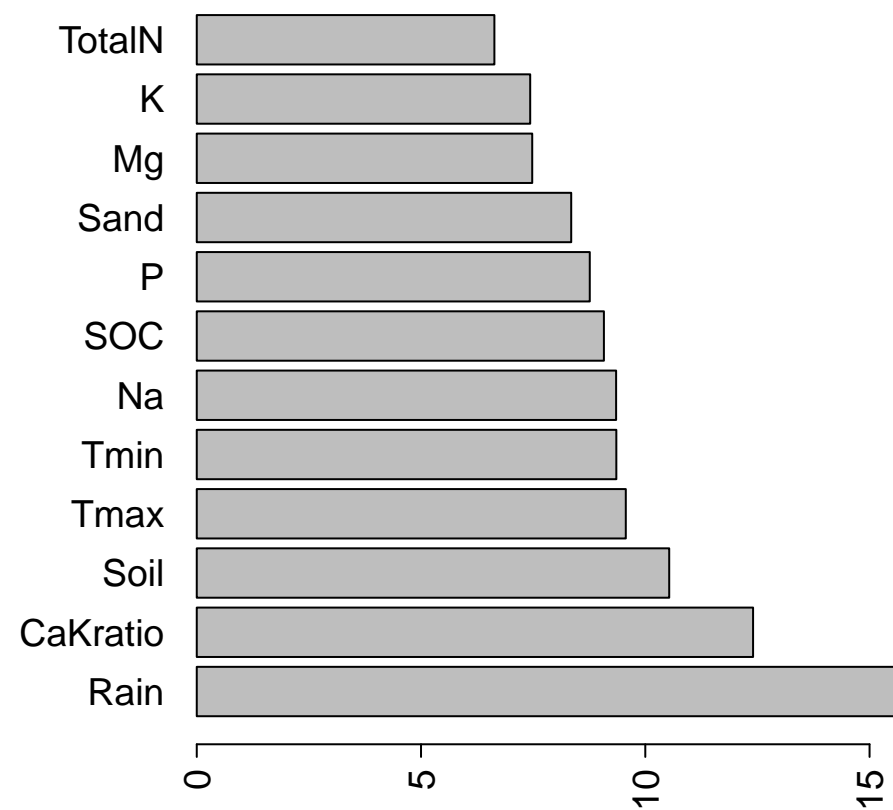**YRP\_IL**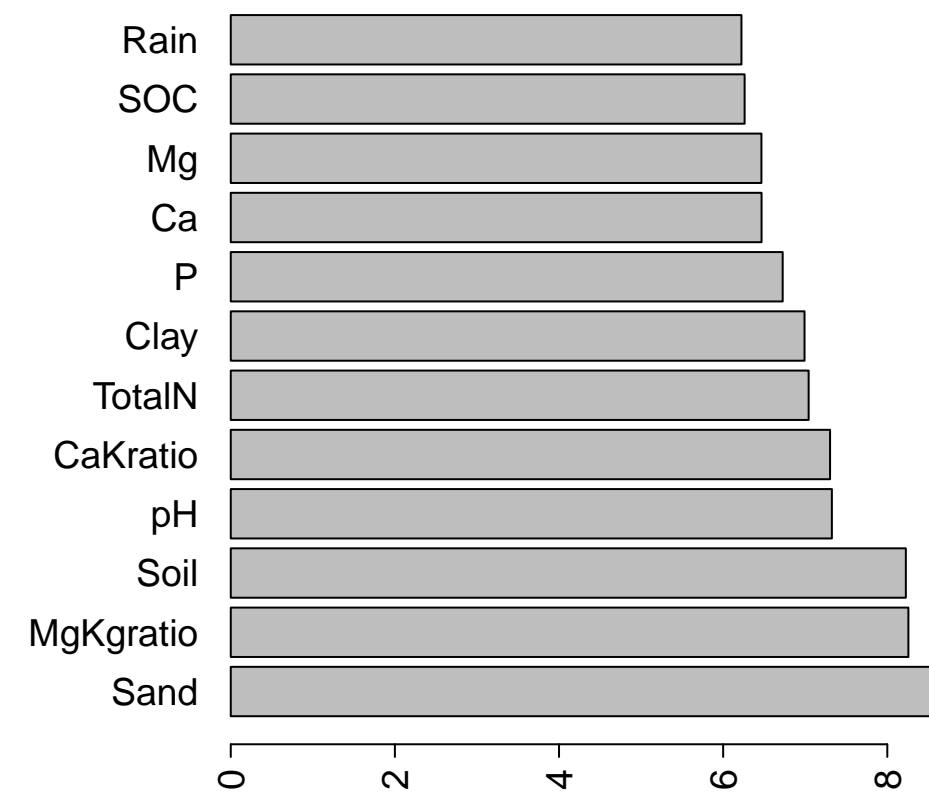**YRK\_IL**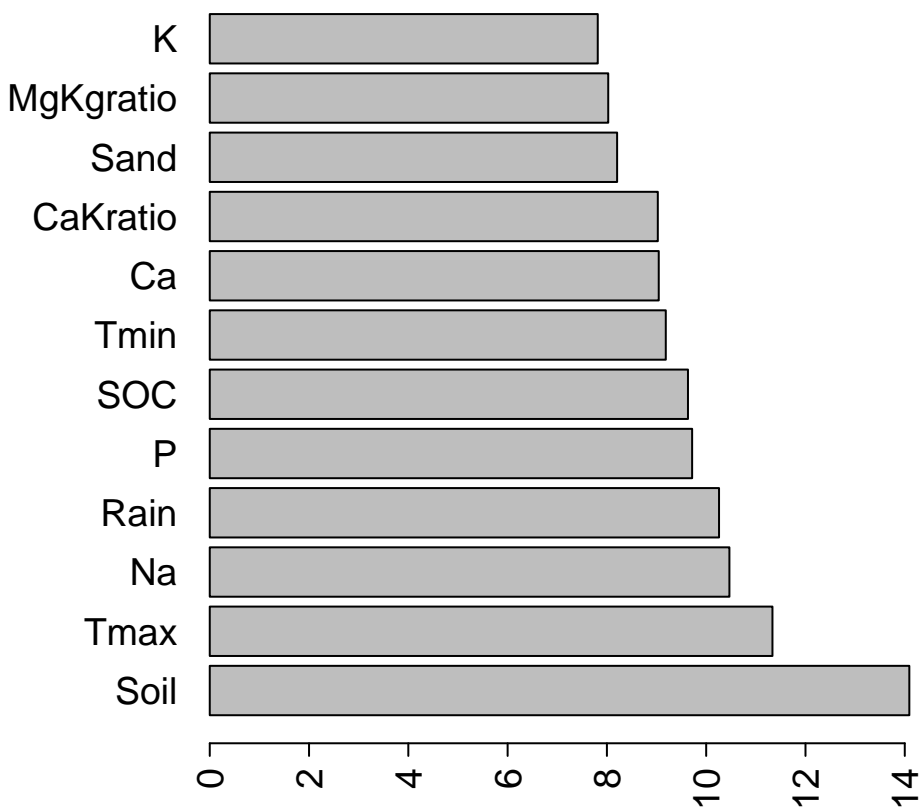**AEN\_IL**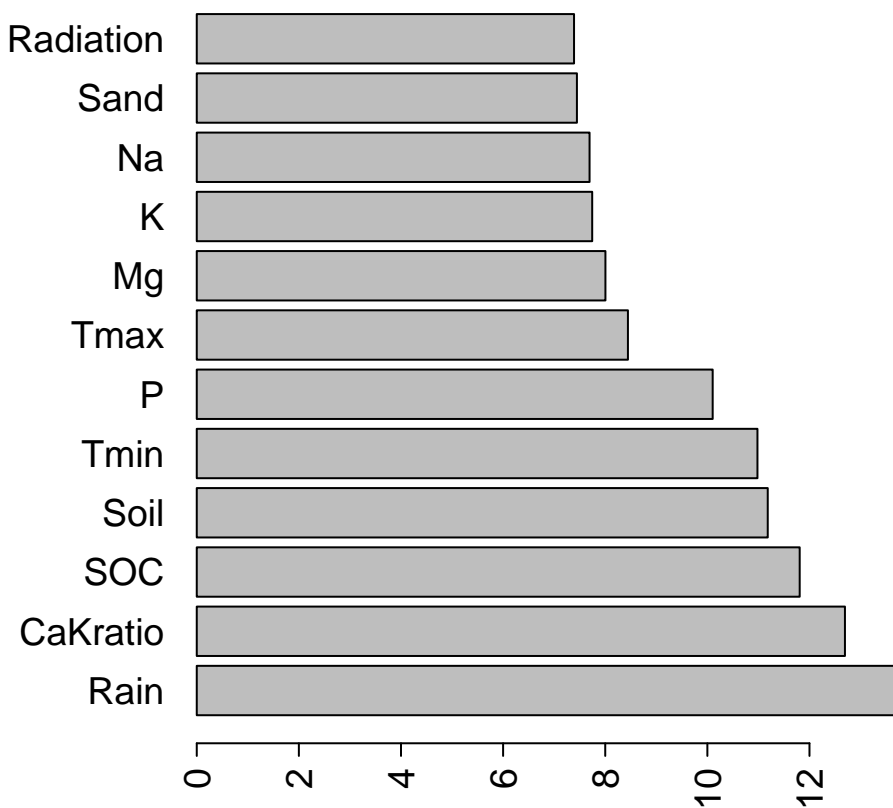**AEP\_IL**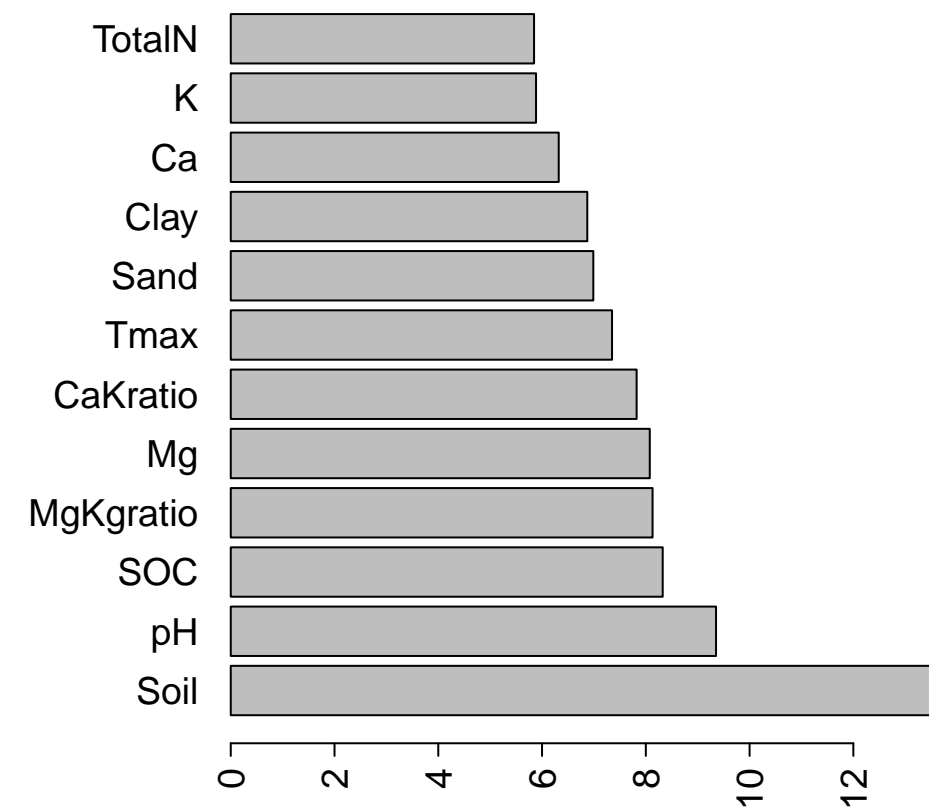**AEK\_IL**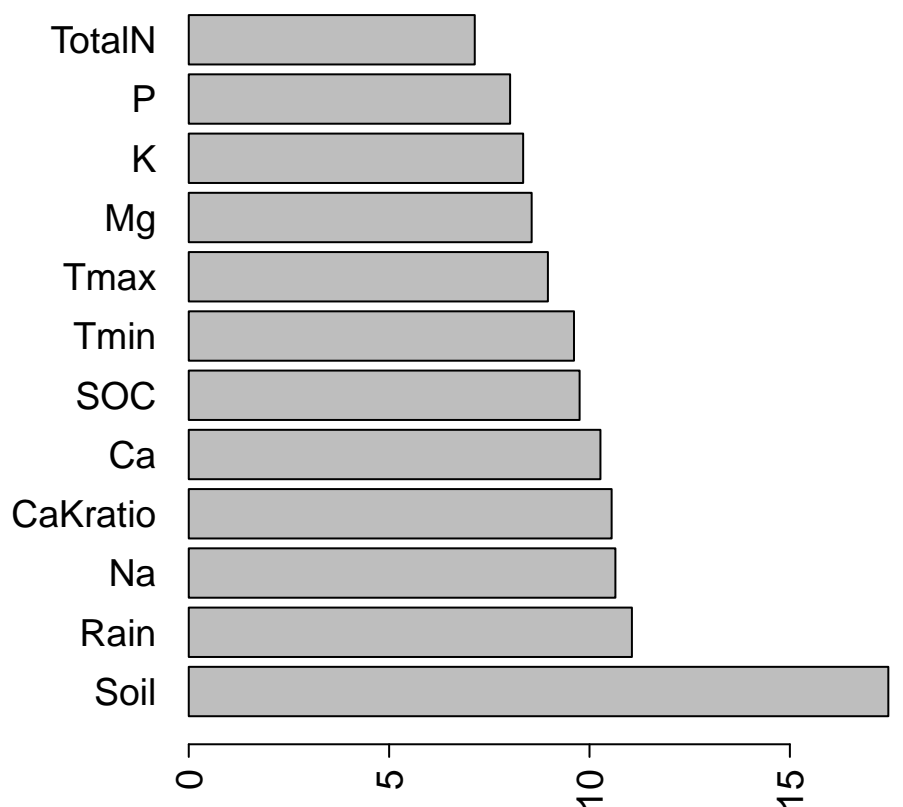

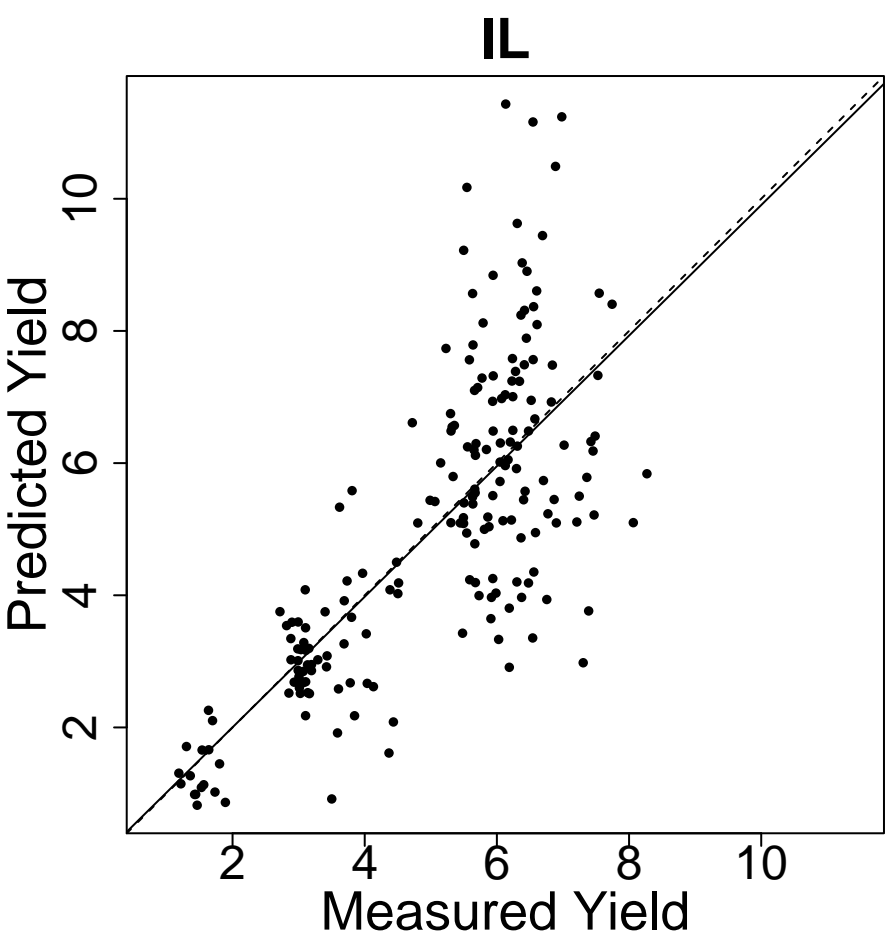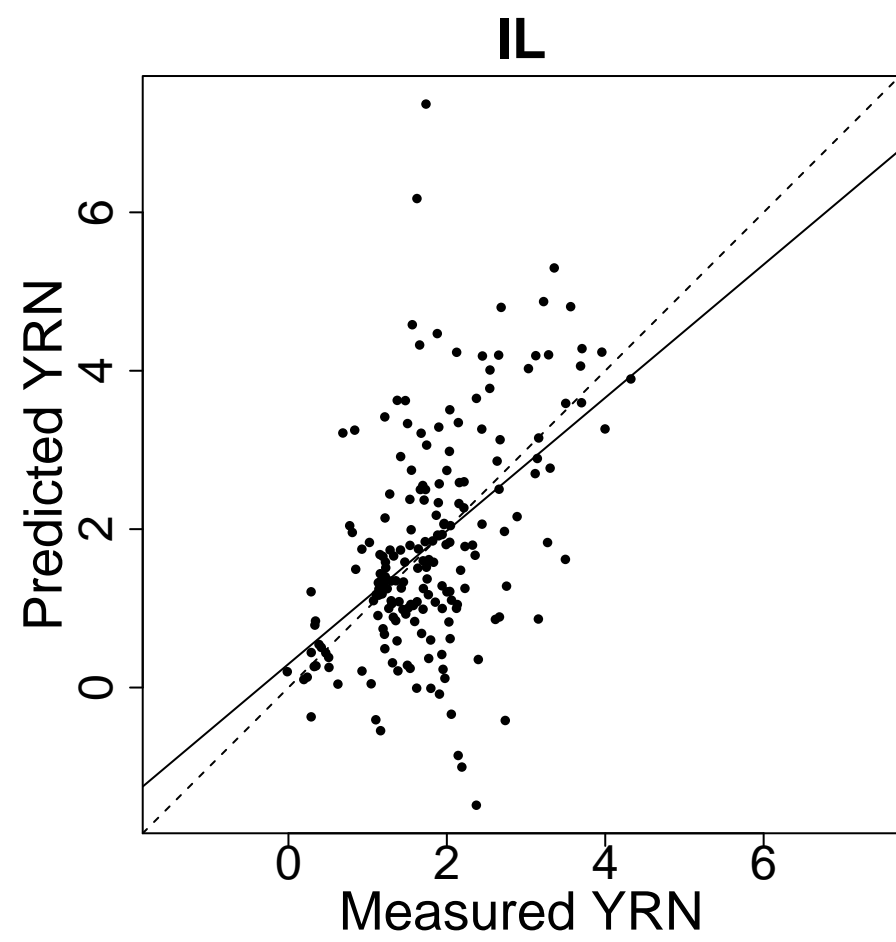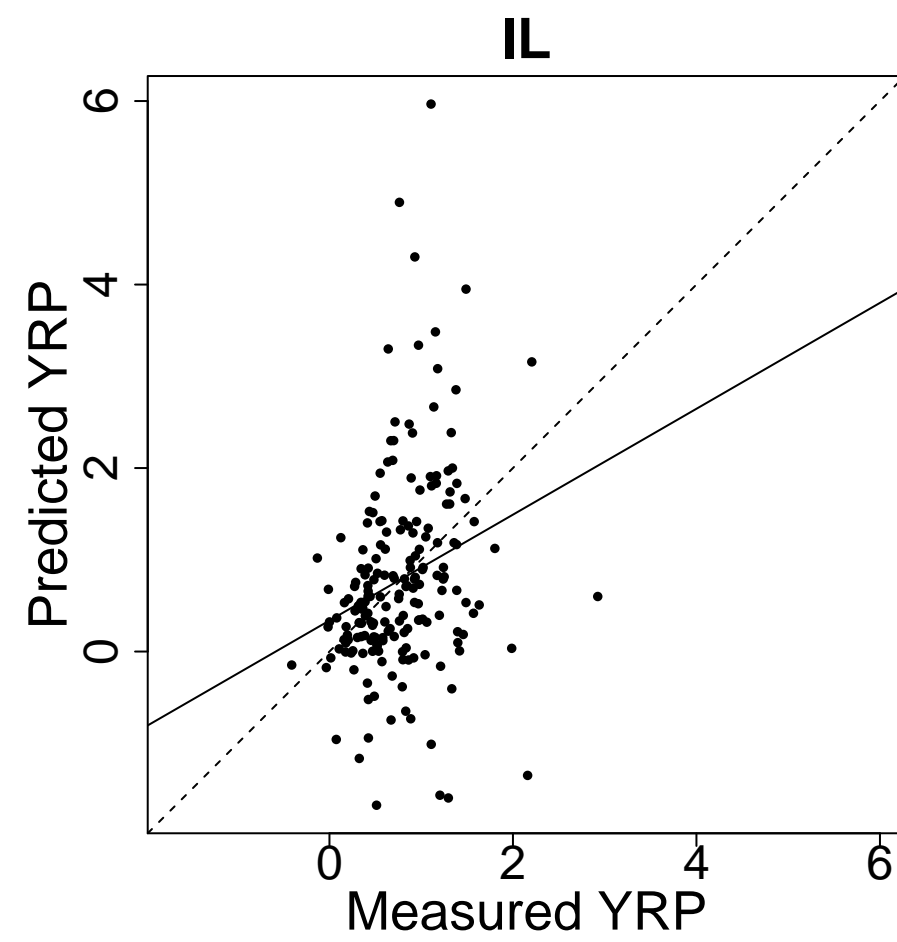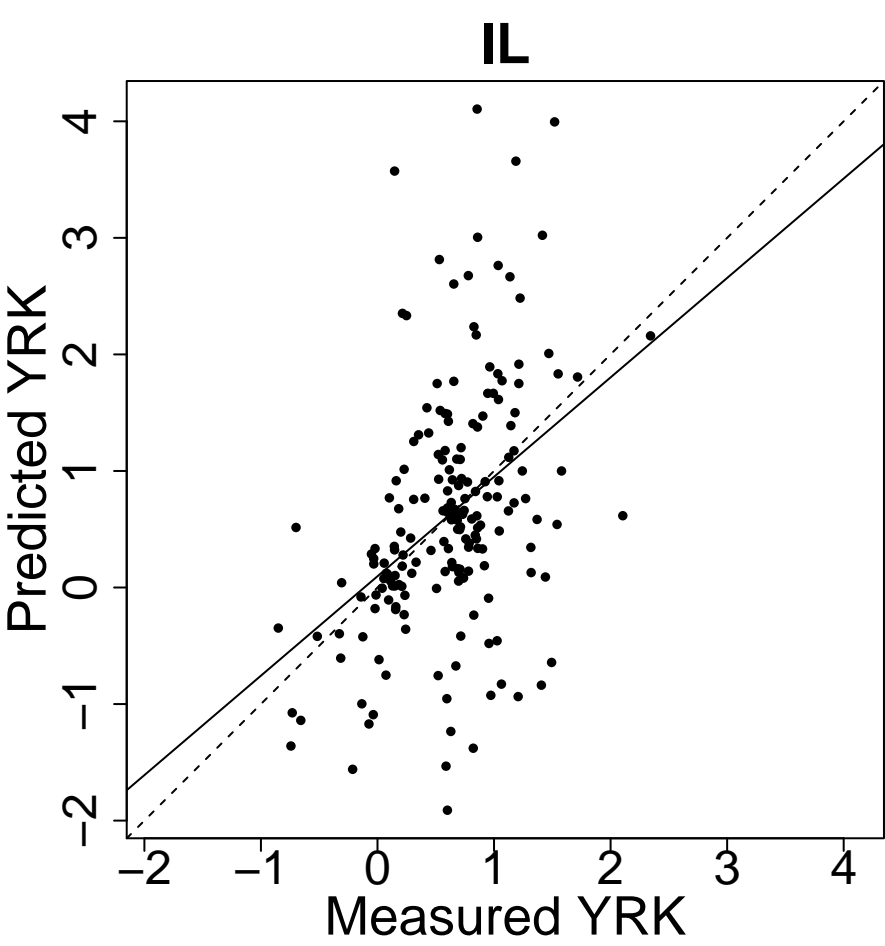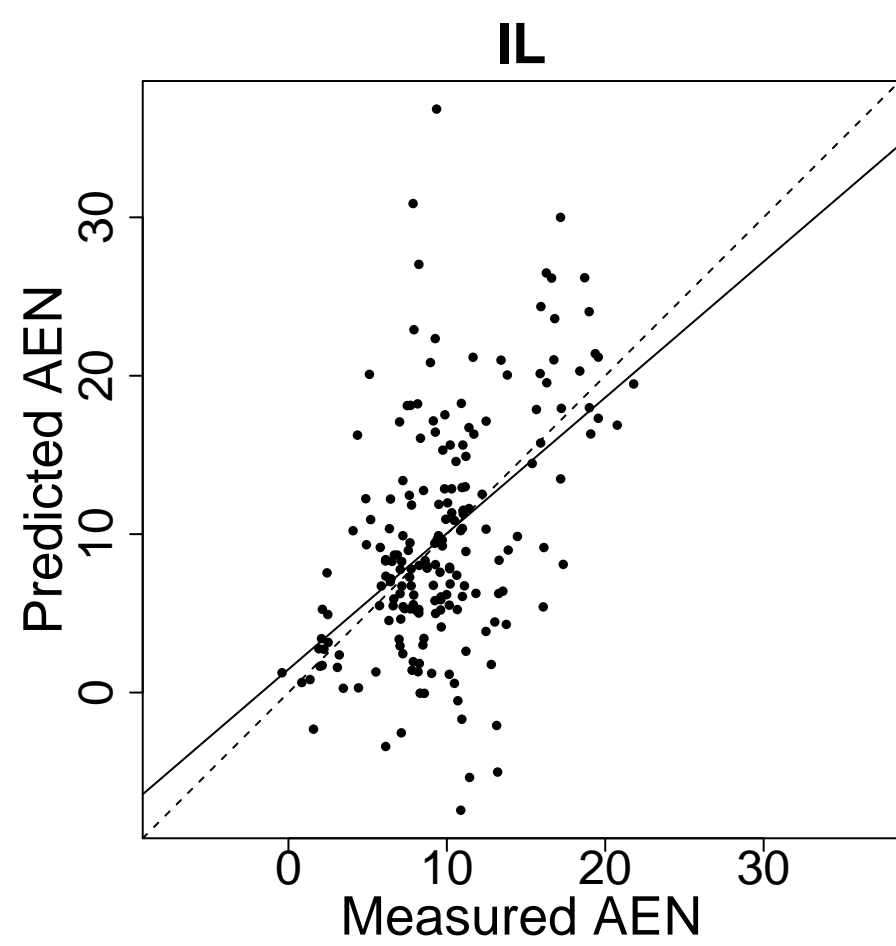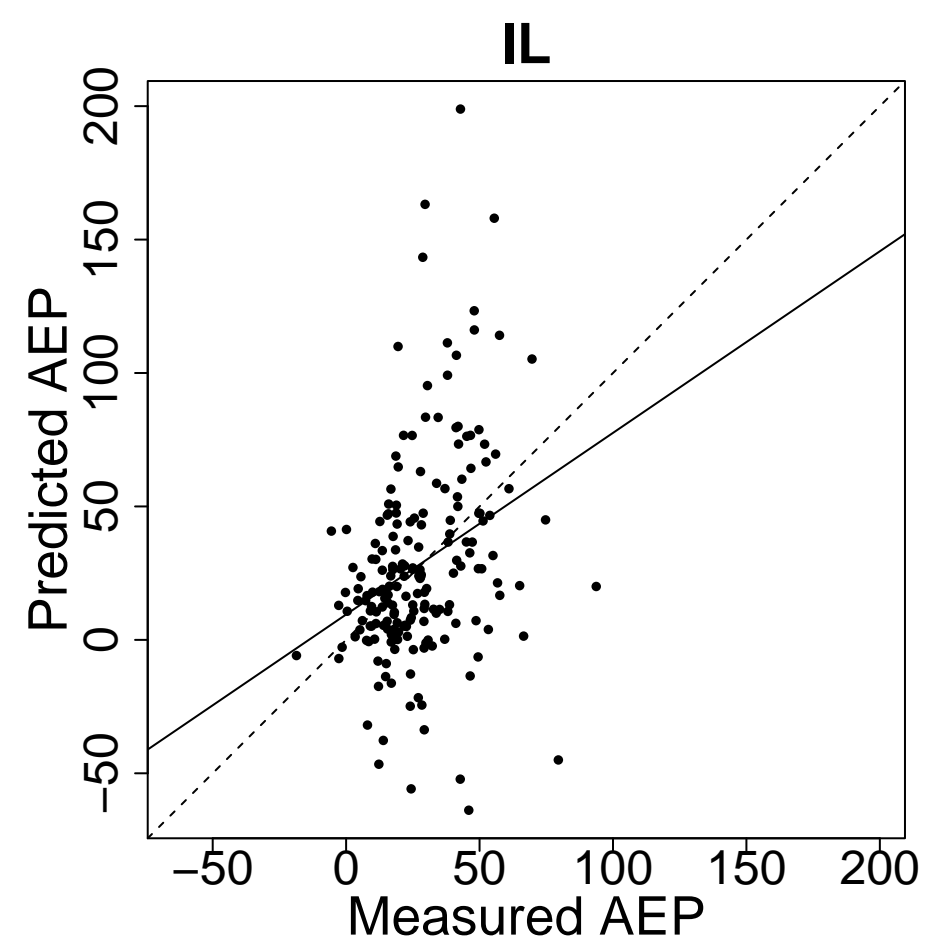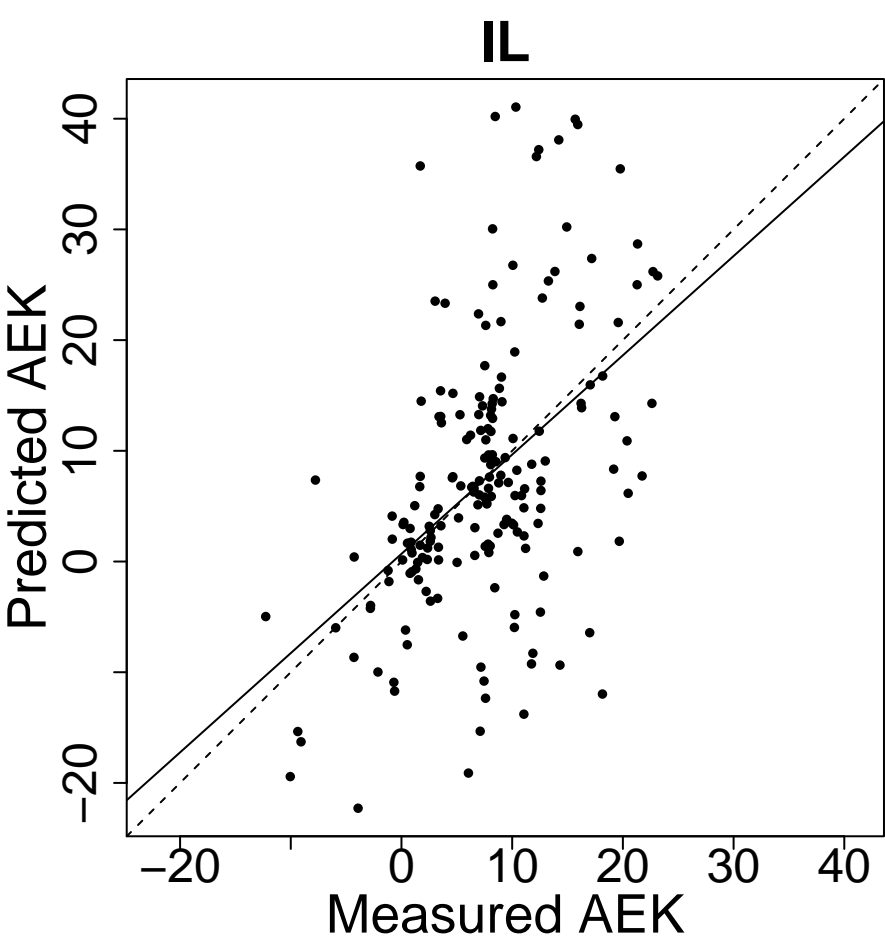

**Yield\_RL**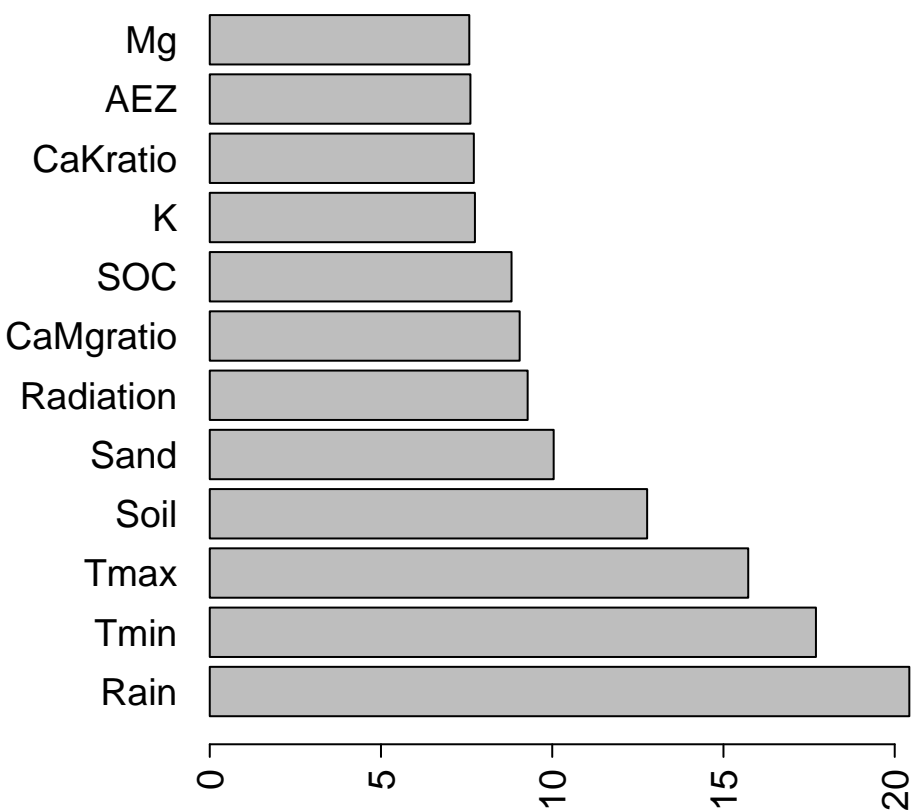**YRN\_RL**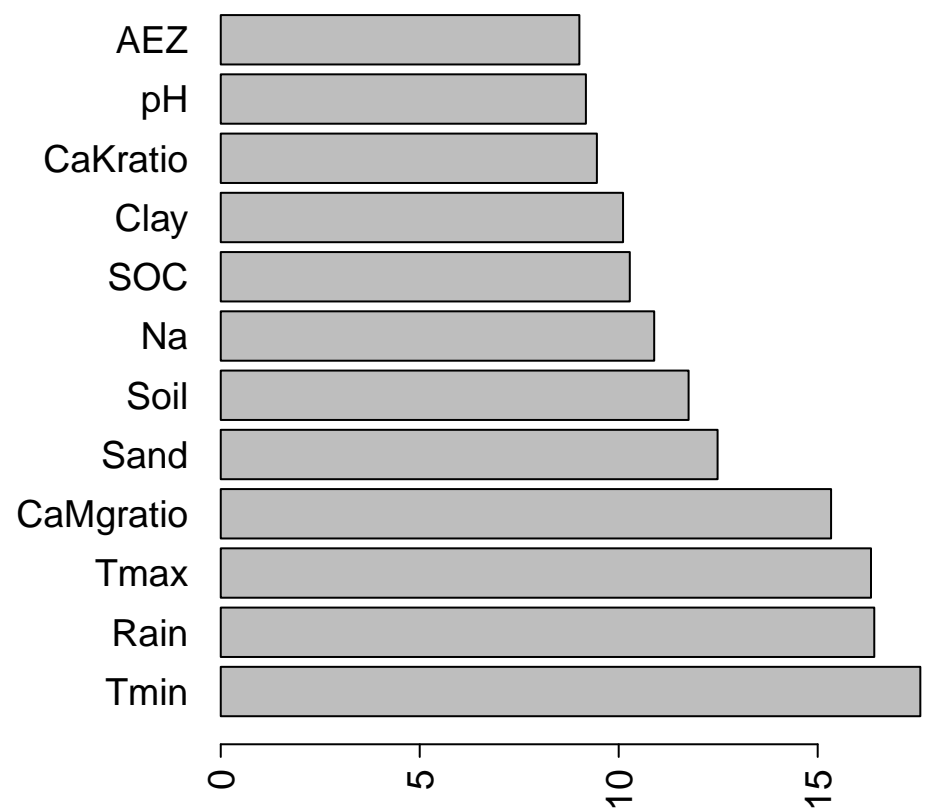**YRP\_RL**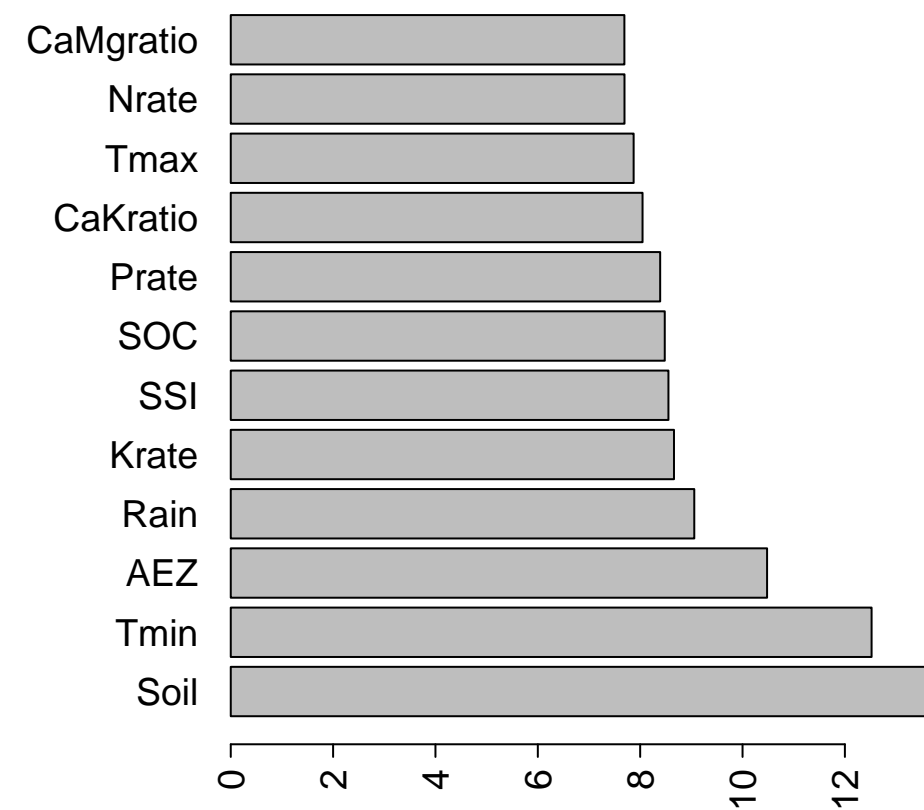**YRK\_RL**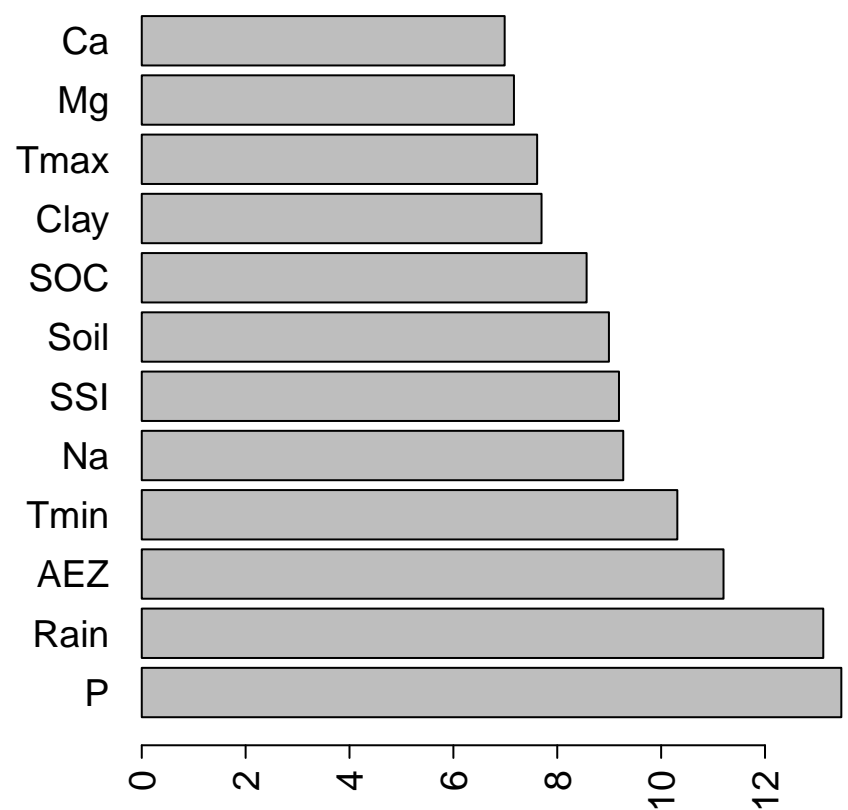**AEN\_RL**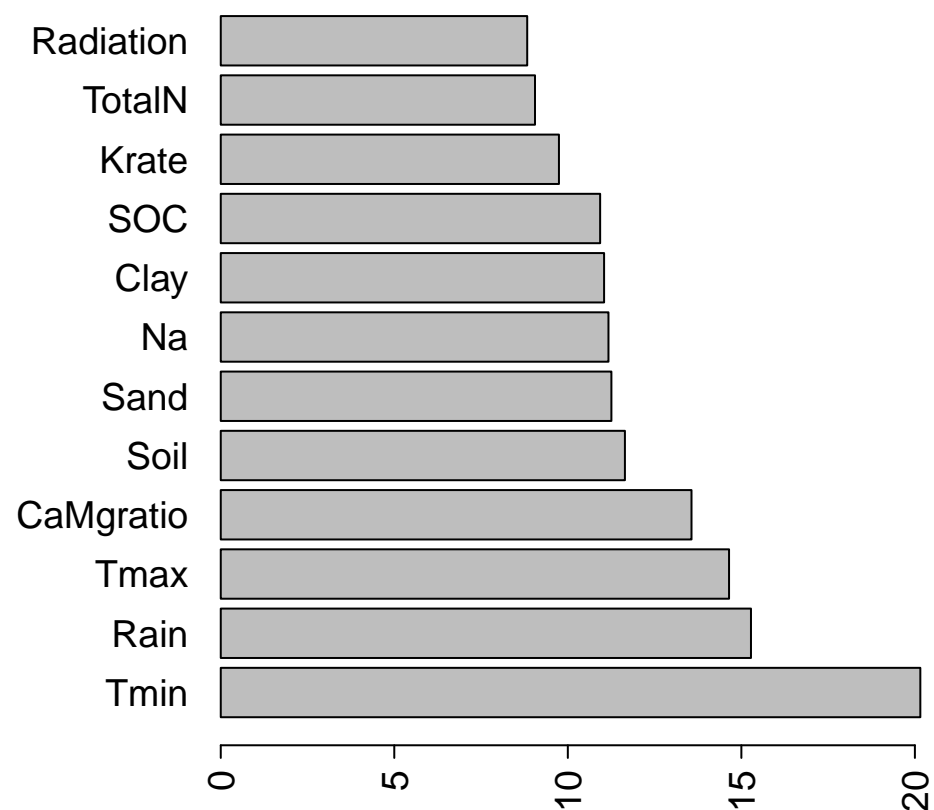**AEP\_RL**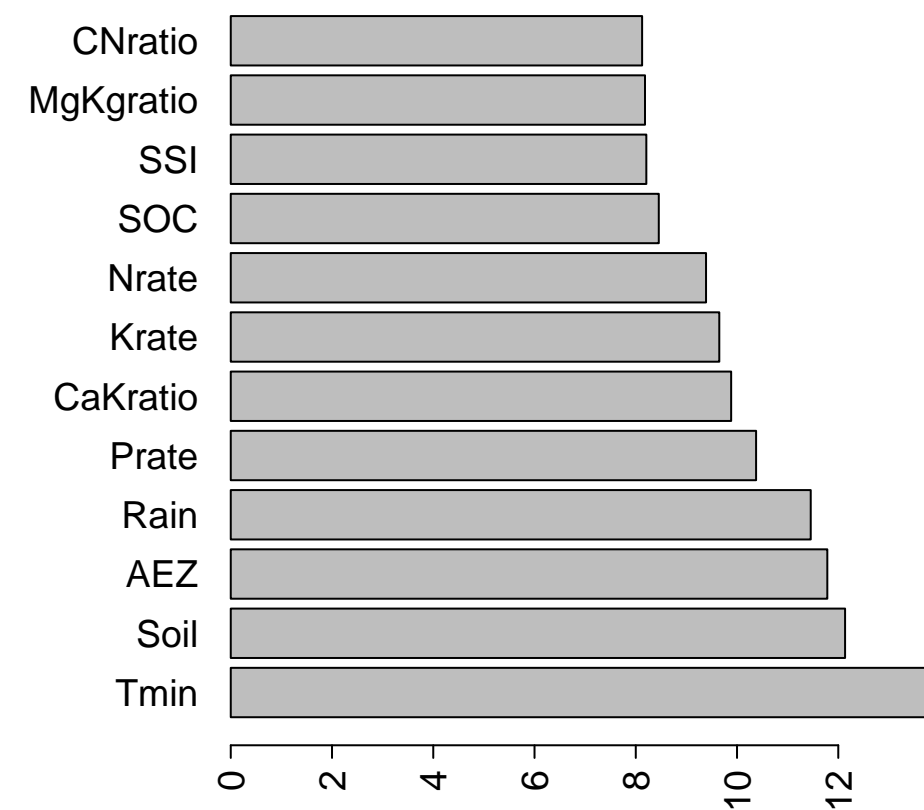**AEK\_RL**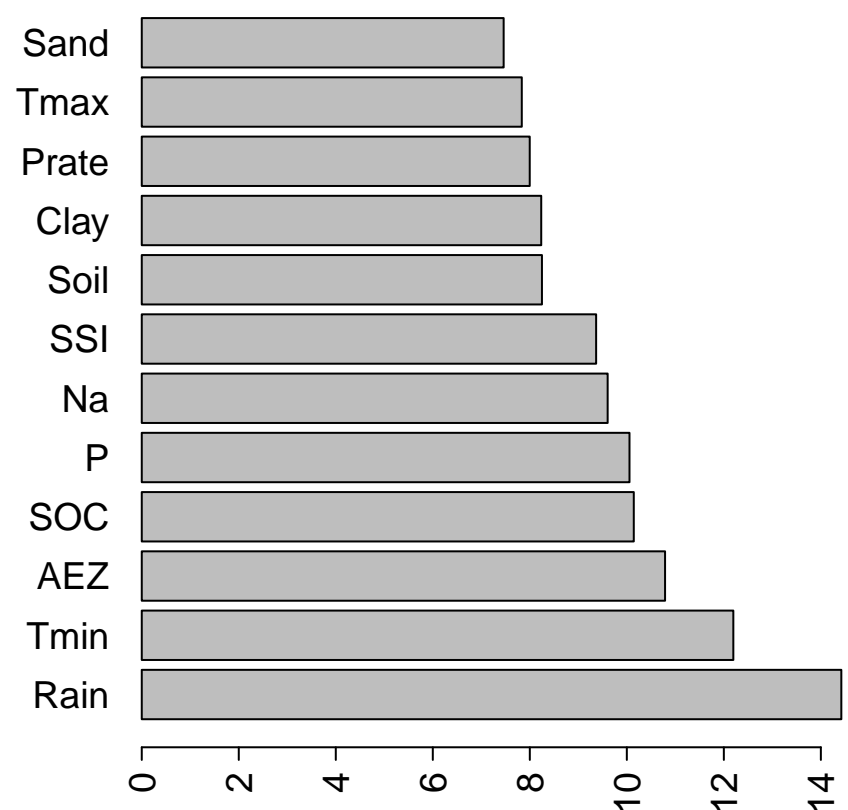

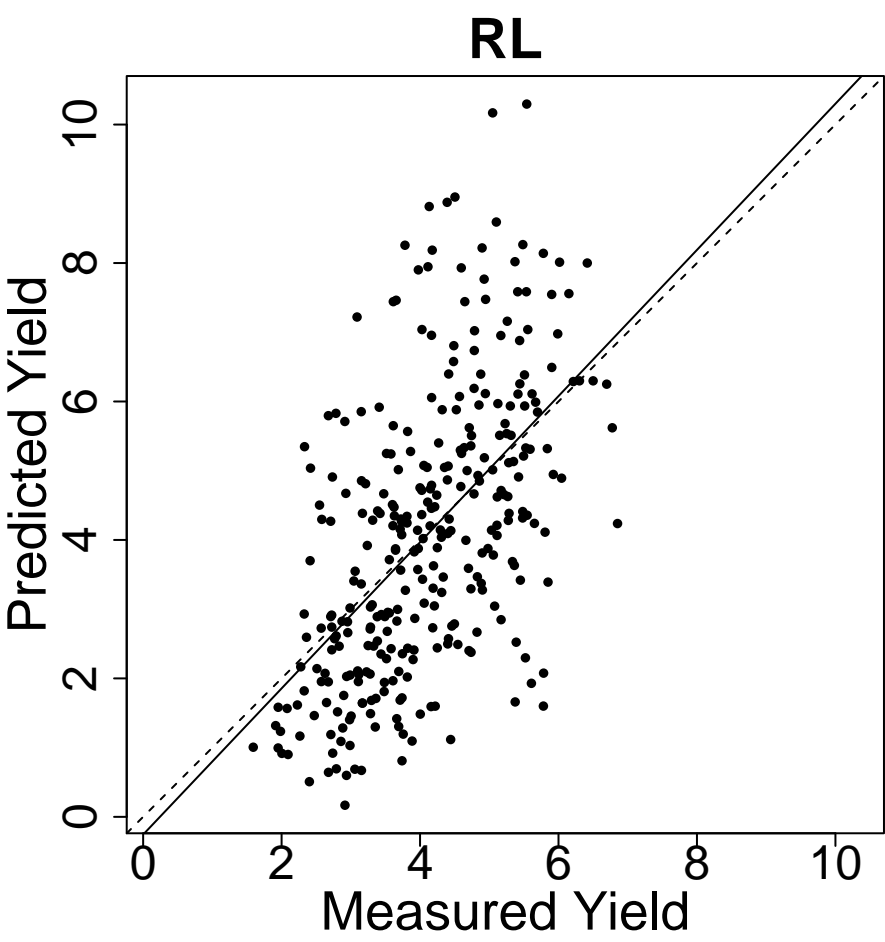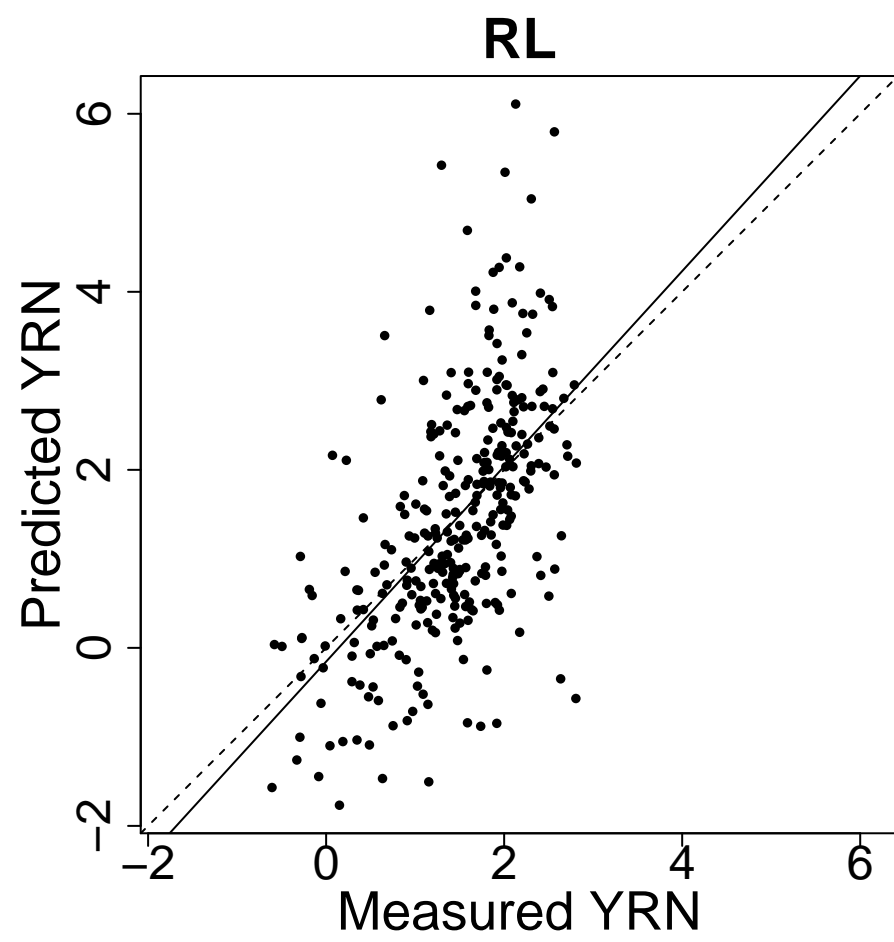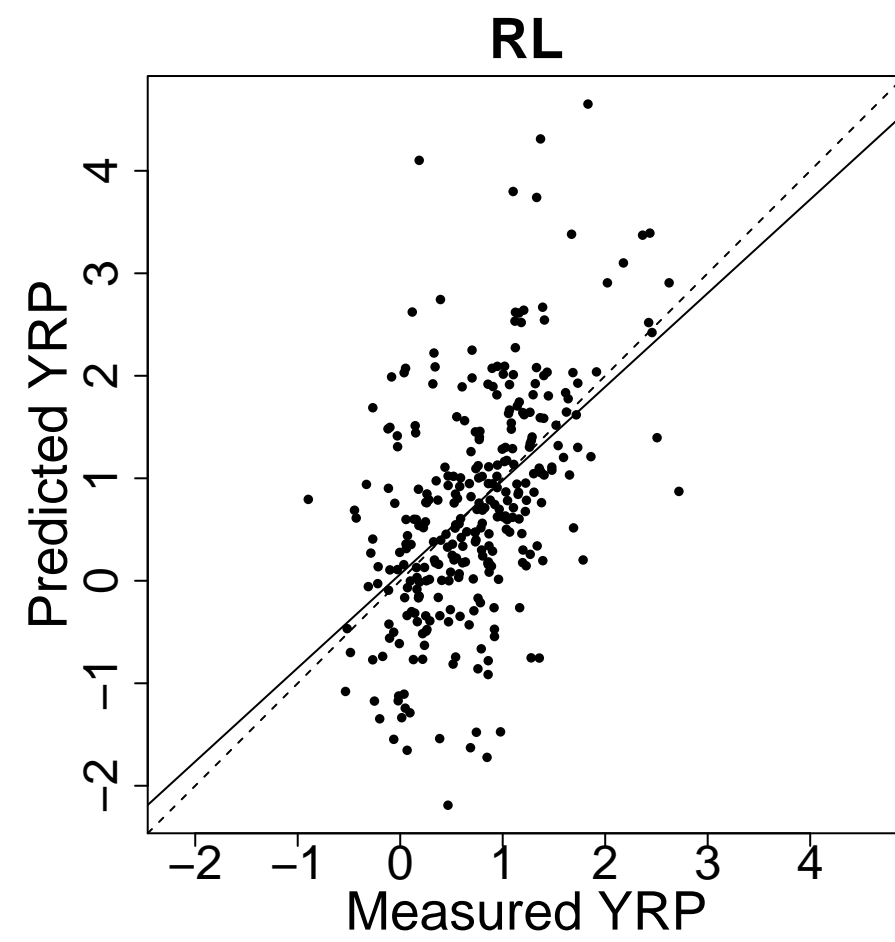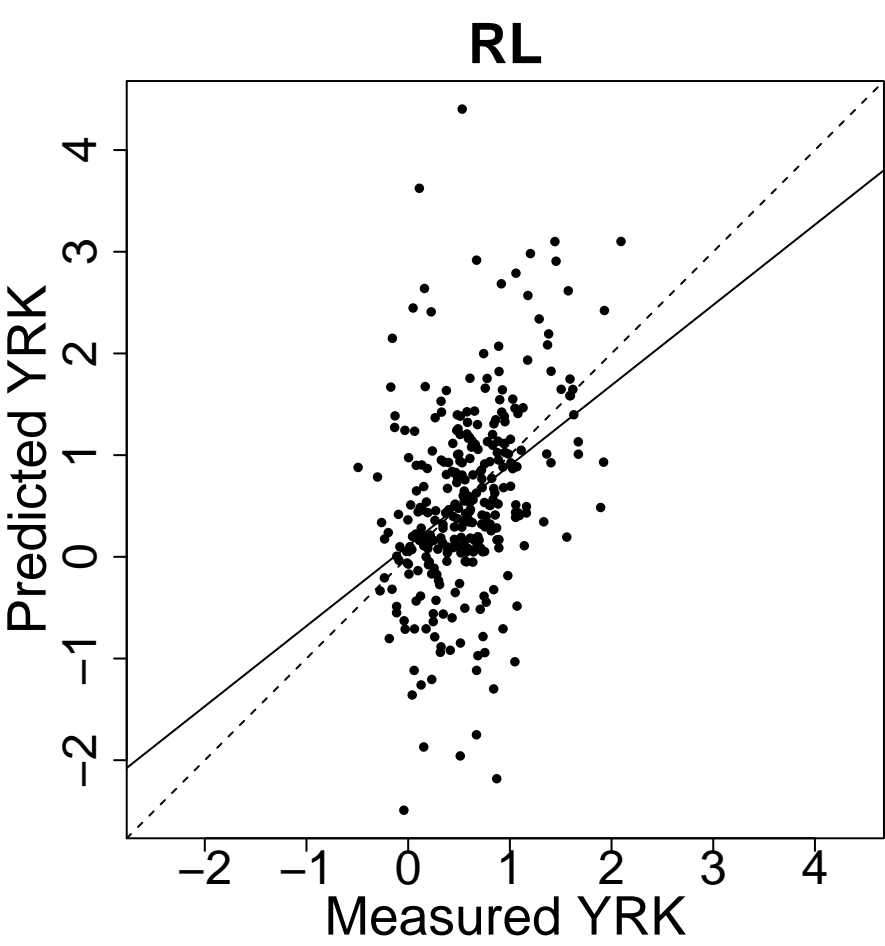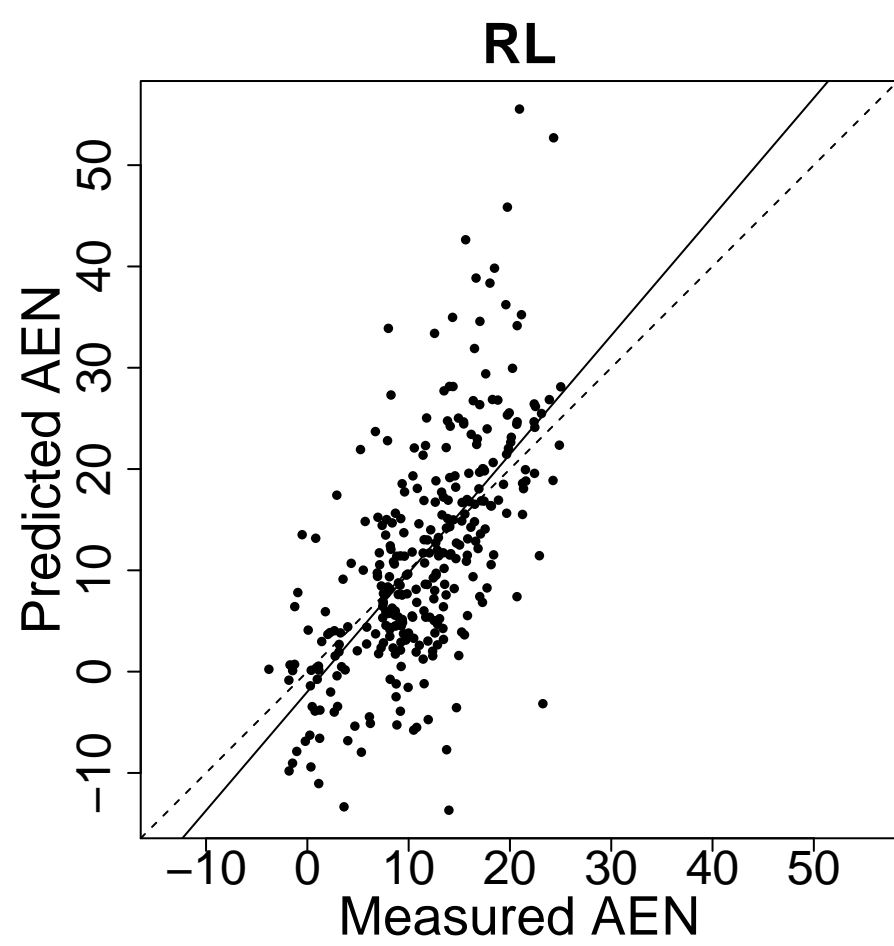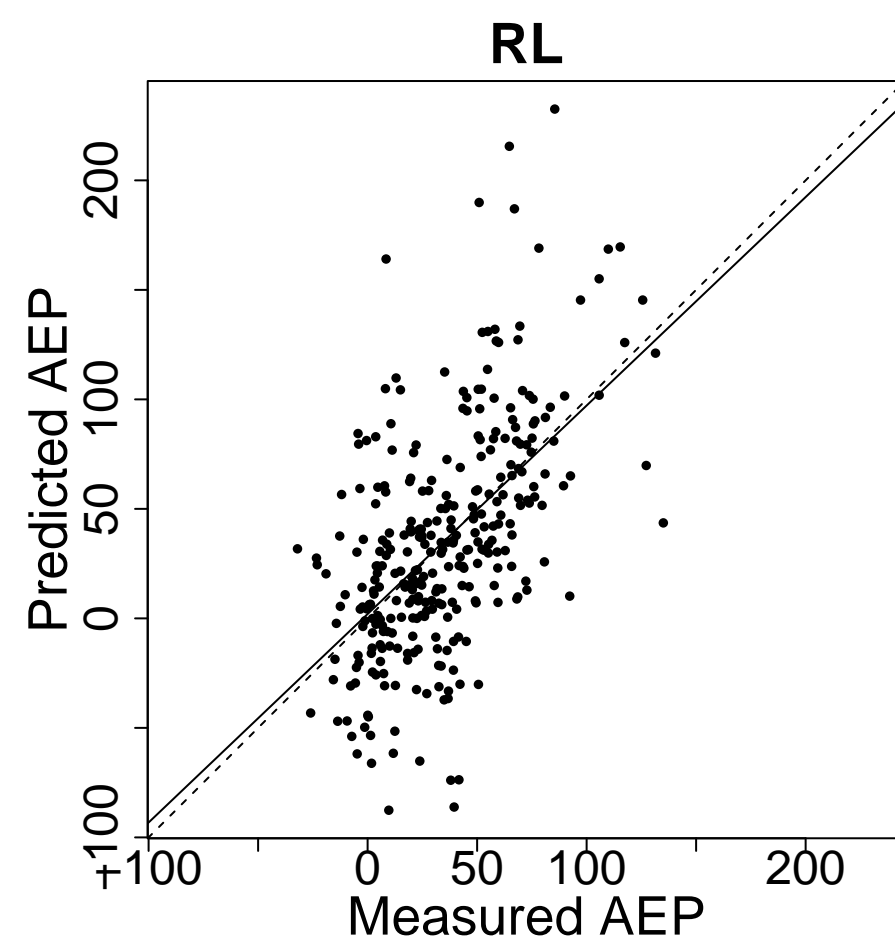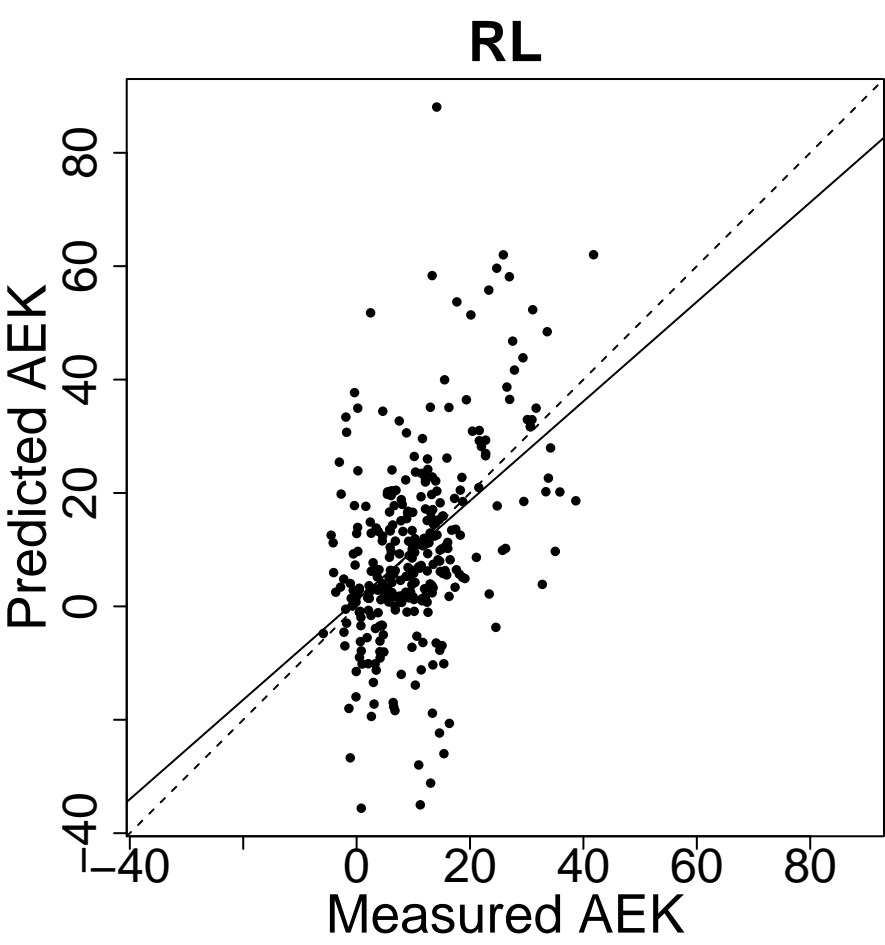

**Yield\_RU**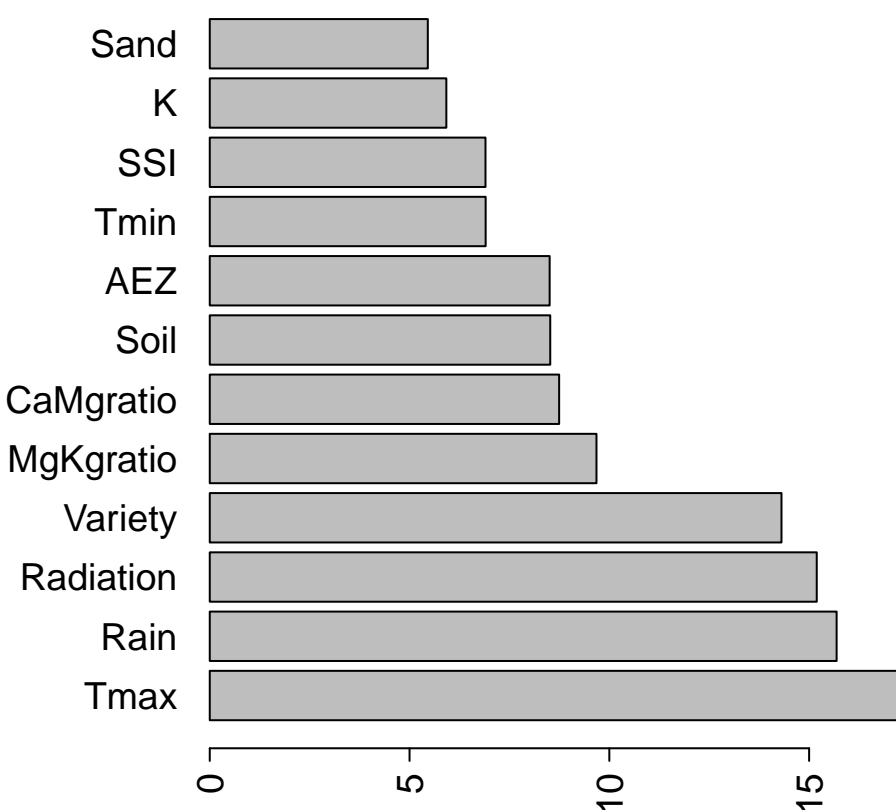**YRN\_RU**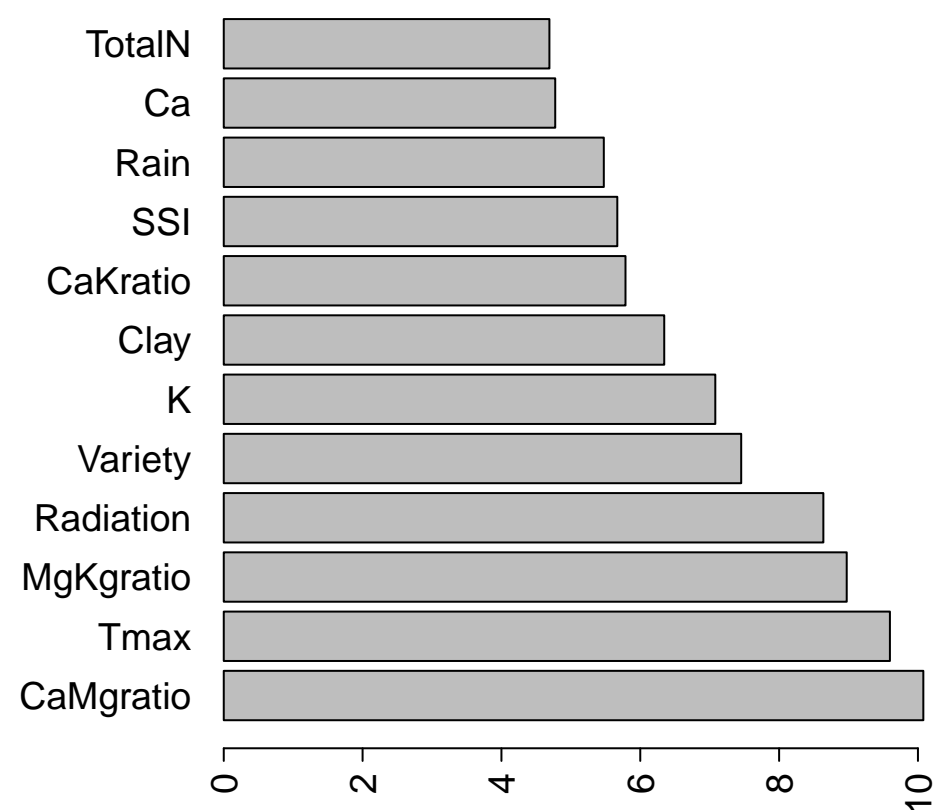**YRP\_RU**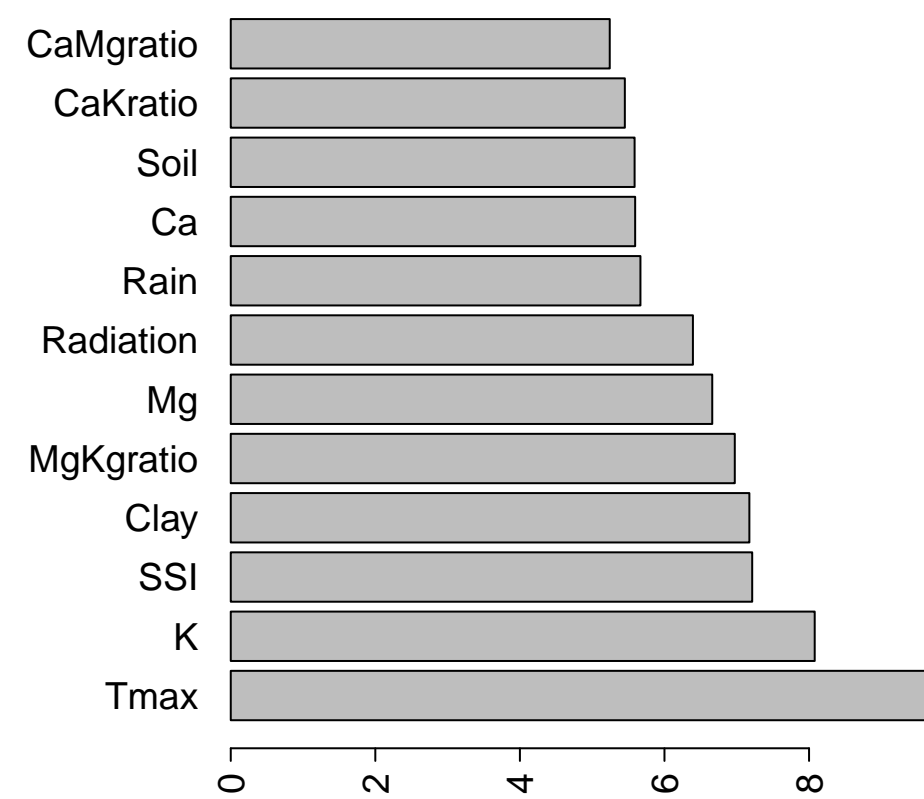**YRK\_RU**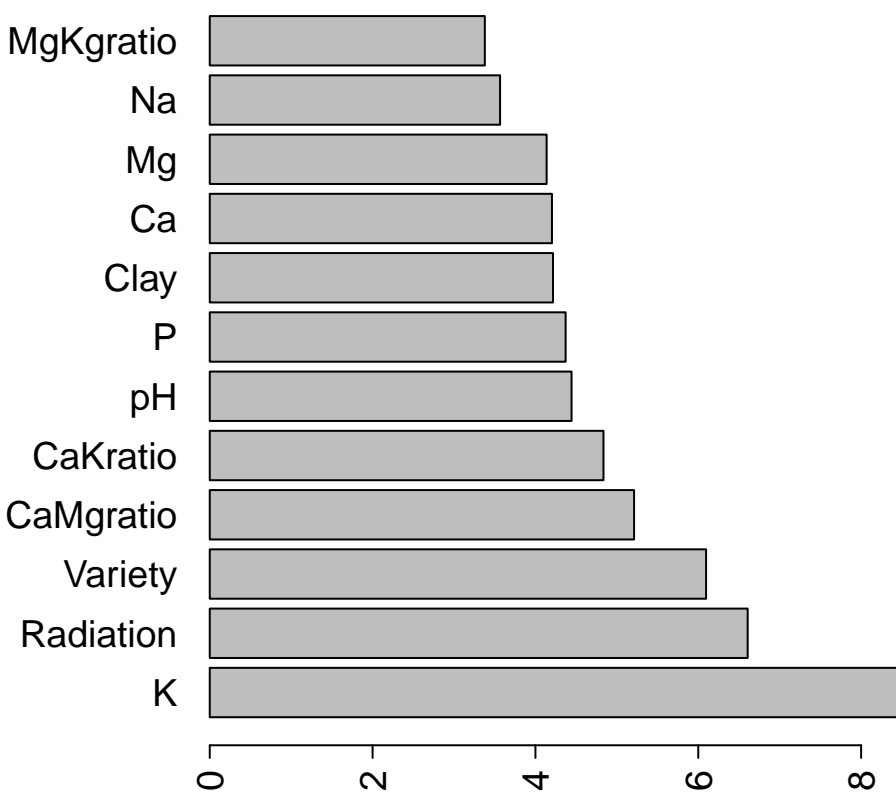**AEN\_RU**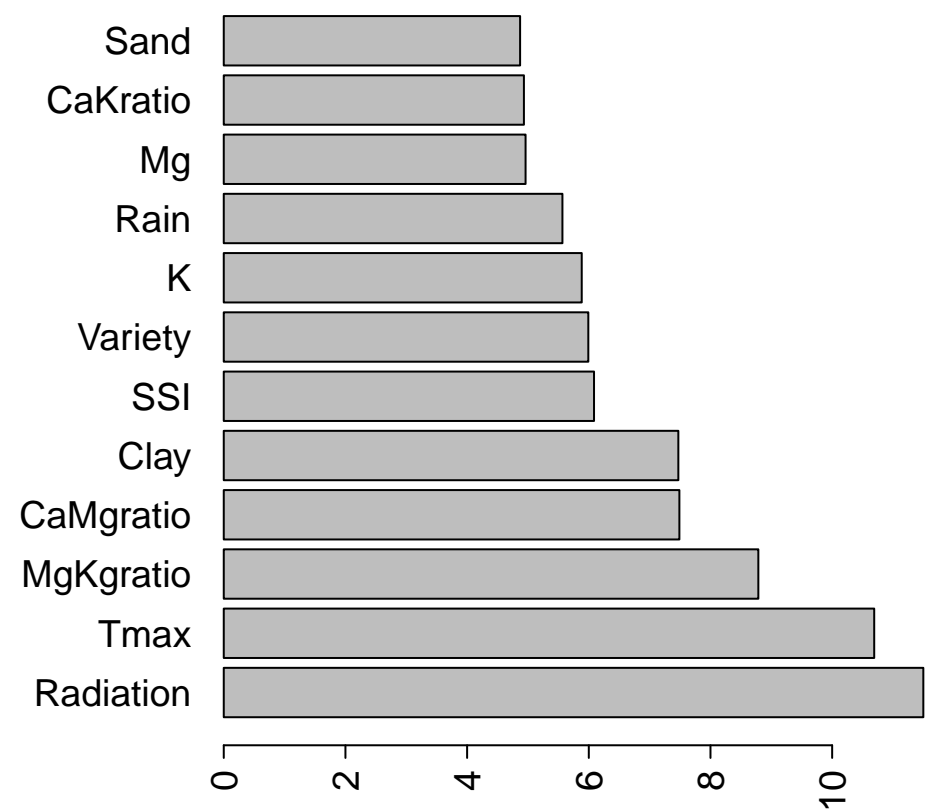**AEP\_RU**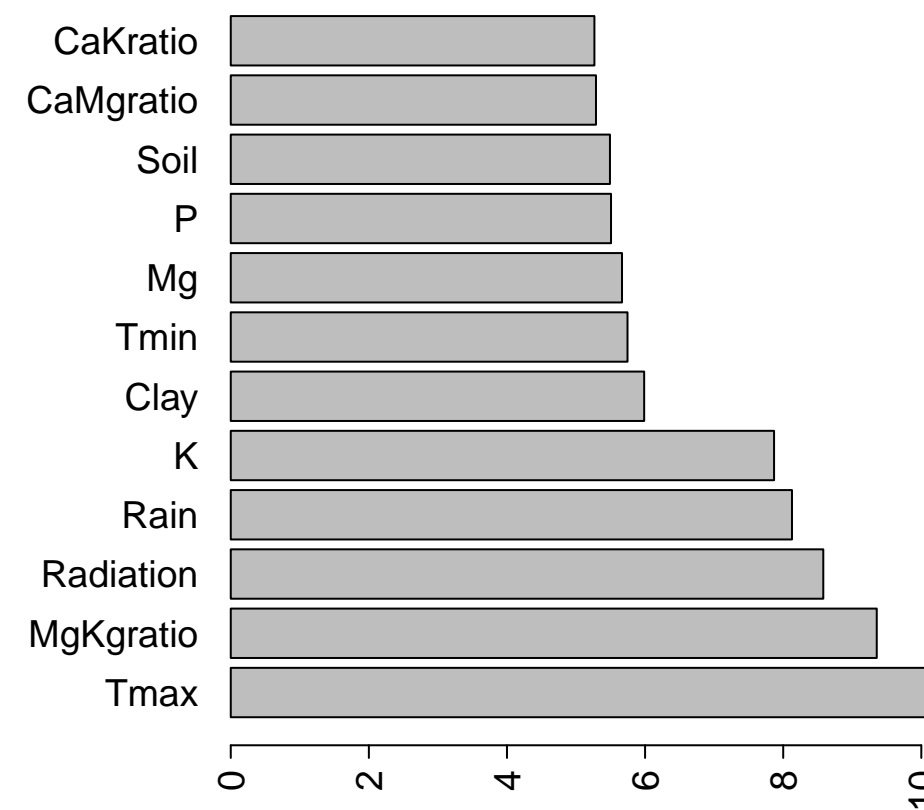**AEK\_RU**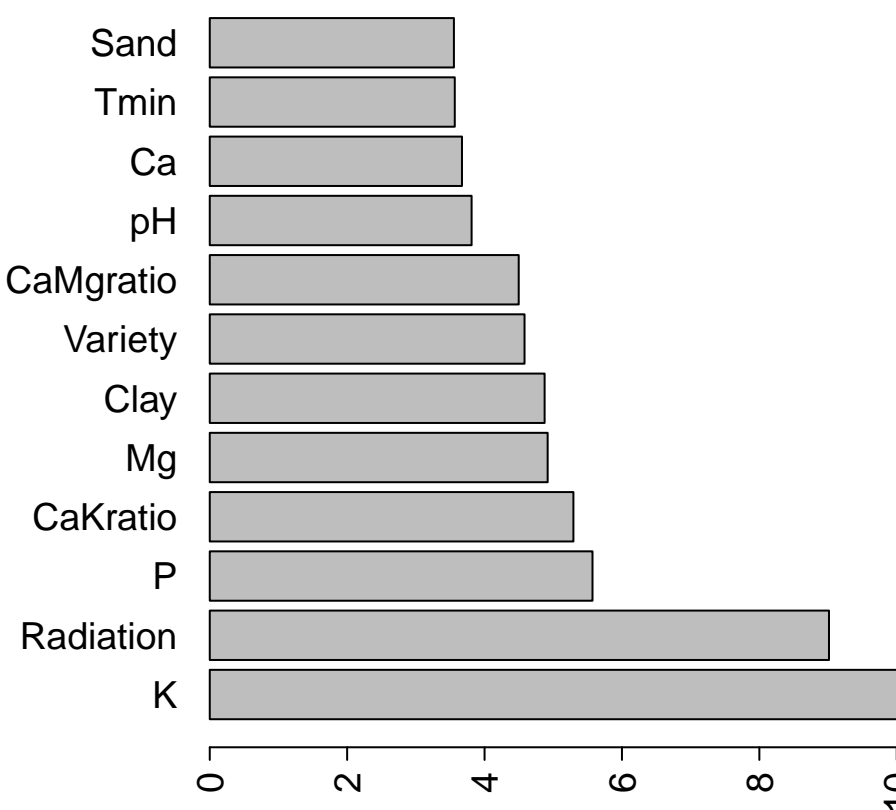

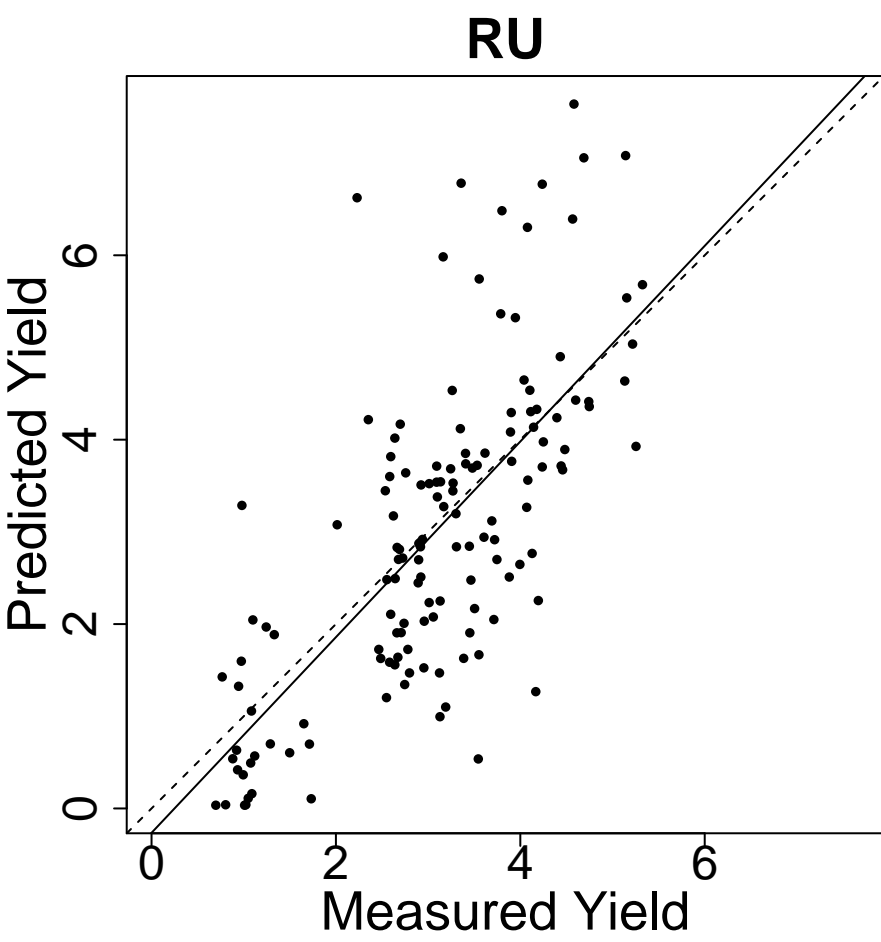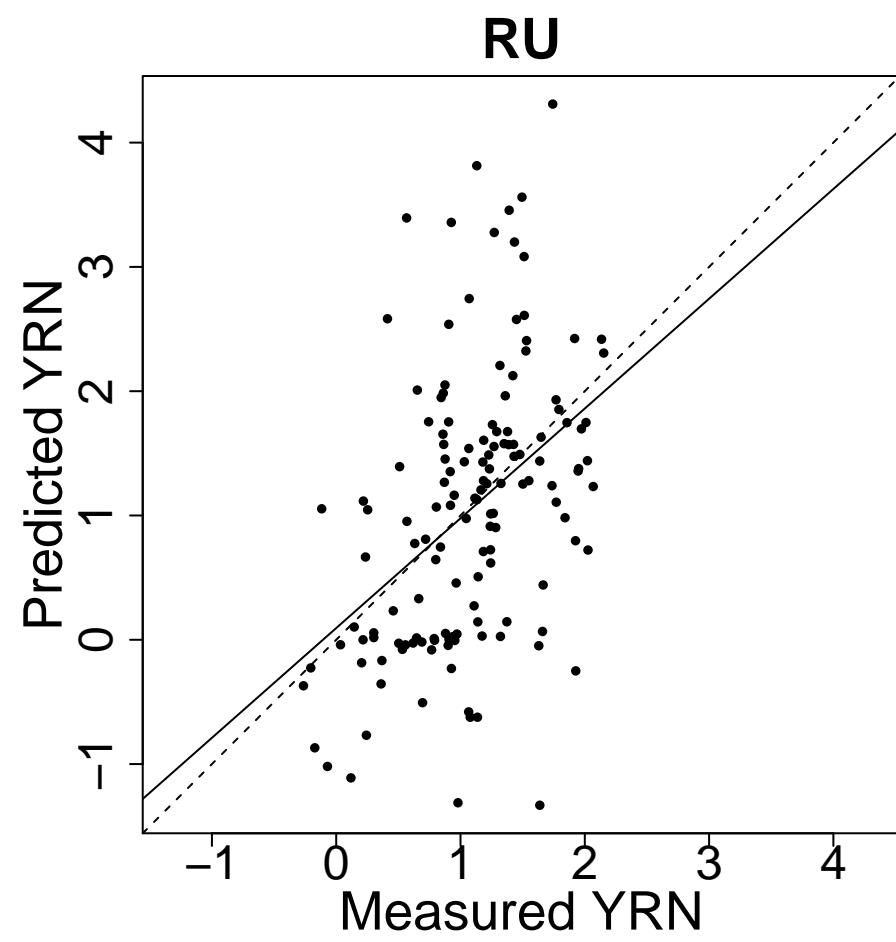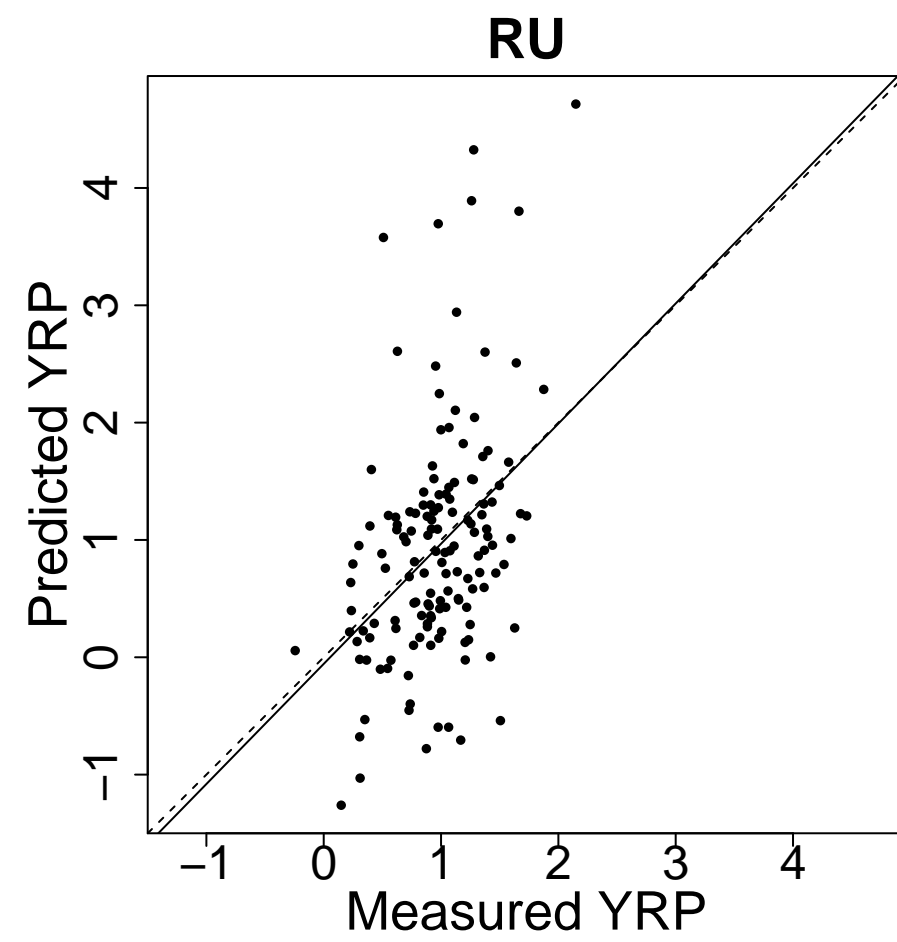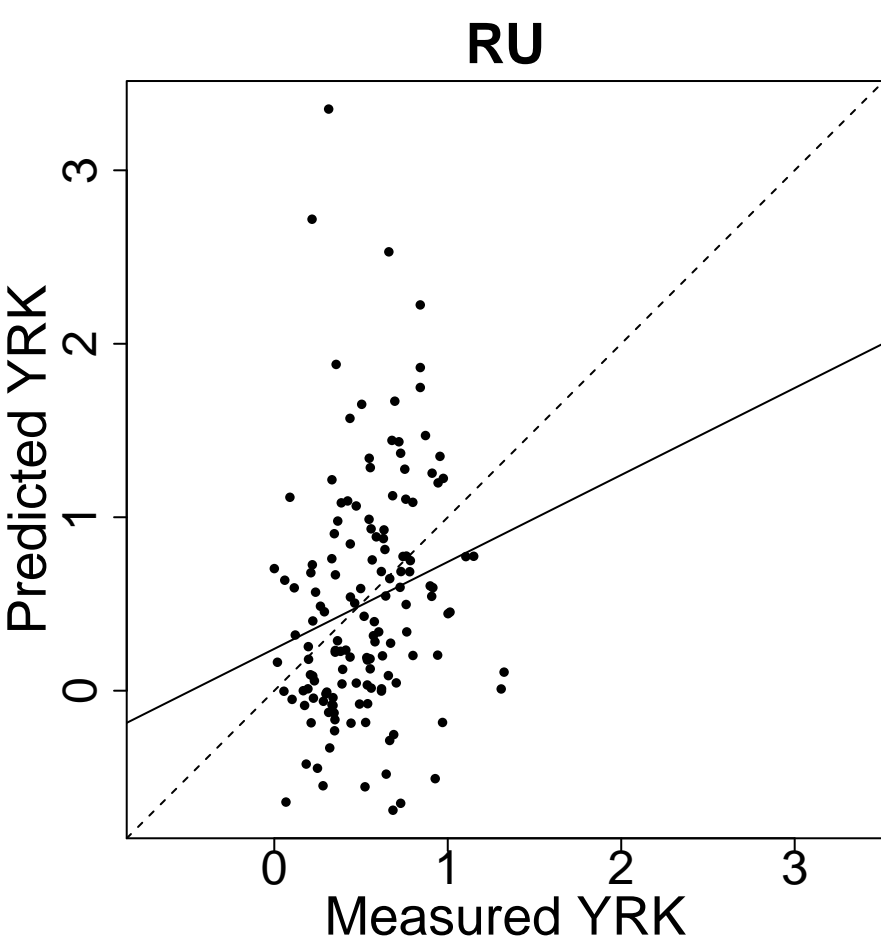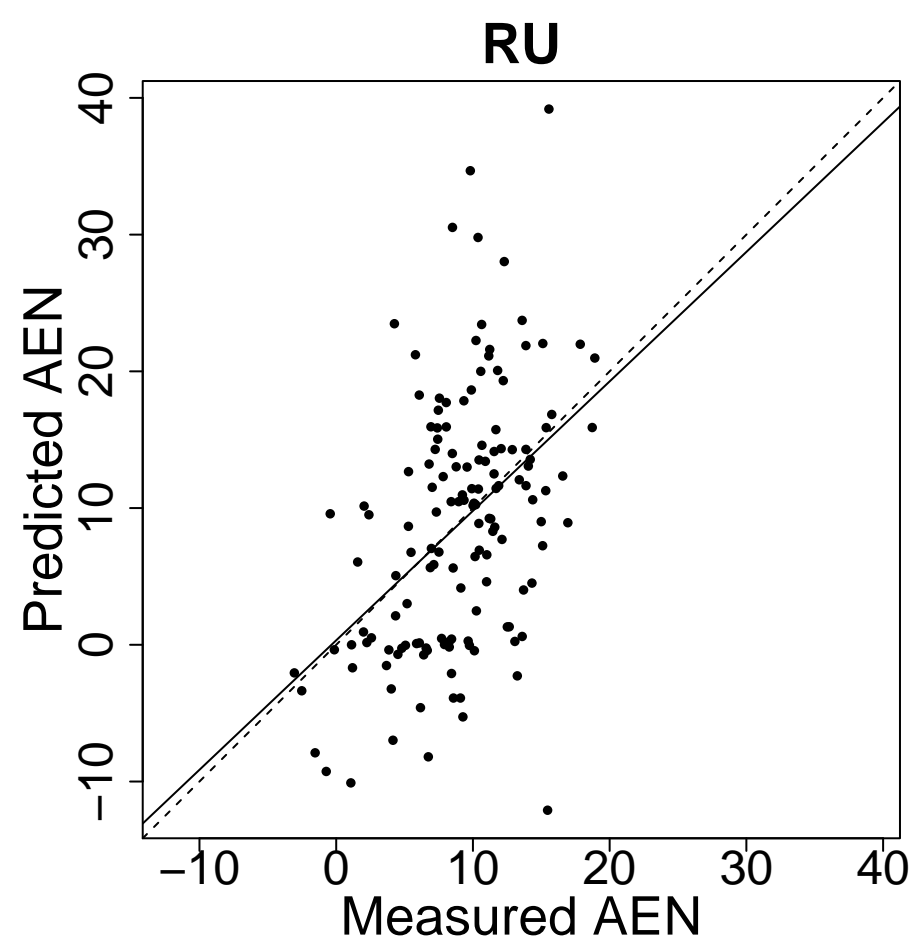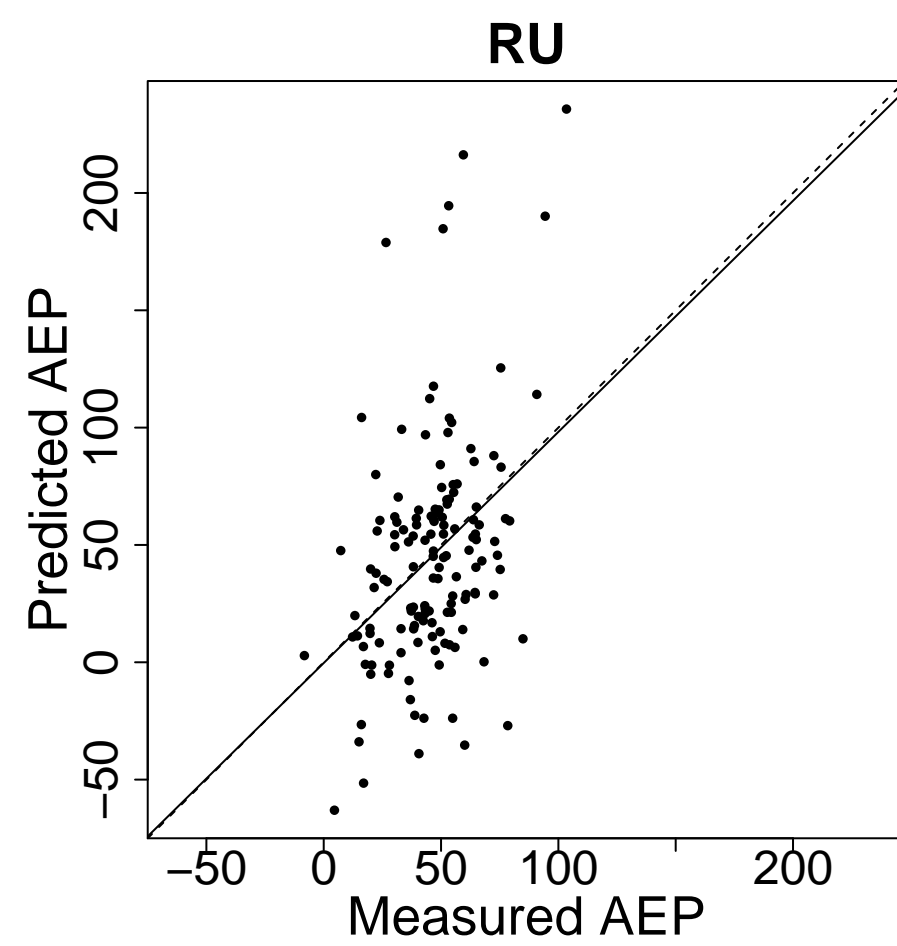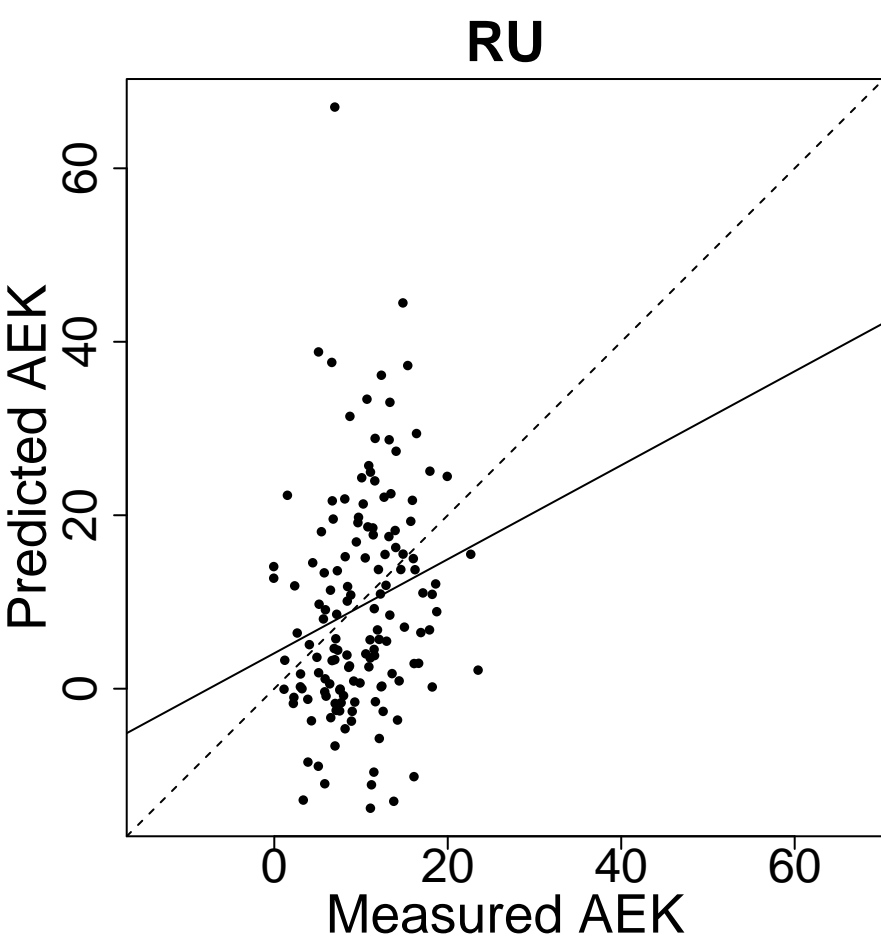

Supplement: MOESM3 [file 13593_2022_821_MOESM3_ESM.pdf]
