# Supplementary material for: Novel insights into factors associated with yield response and nutrient use efficiency of maize and rice in sub-Saharan Africa. A review
Source: Springer Nature journal article supplement (doi:10.1007/s13593-022-00821-4), 2022-08-22

**Yield**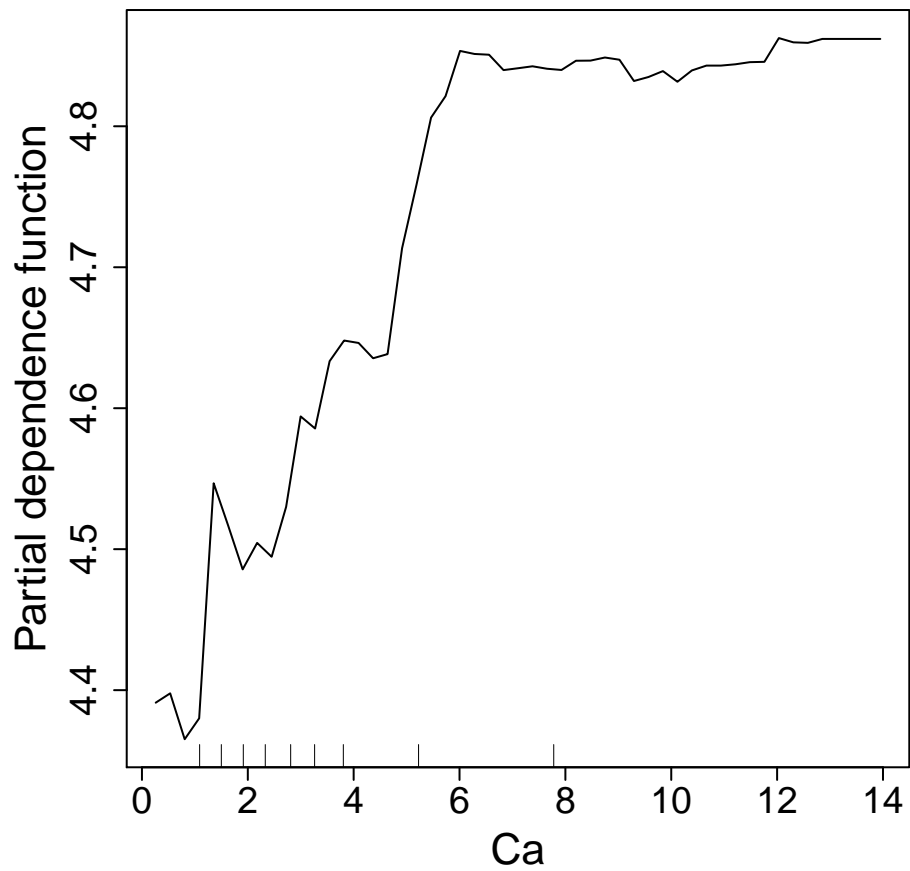**Yield**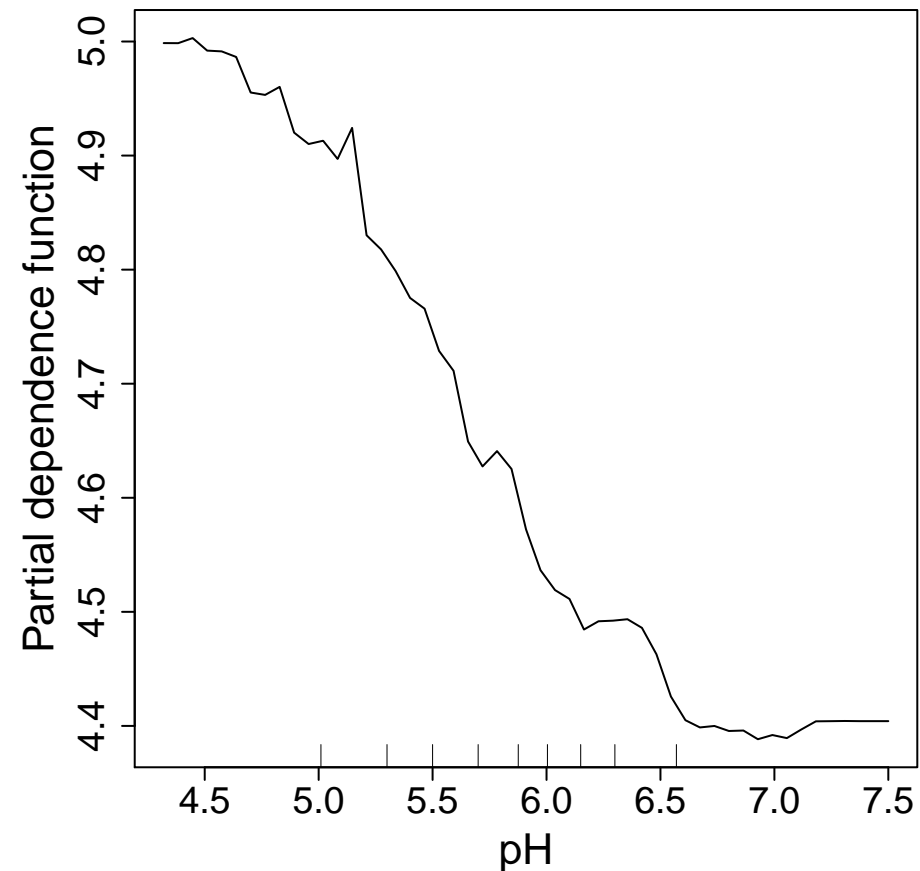**Yield**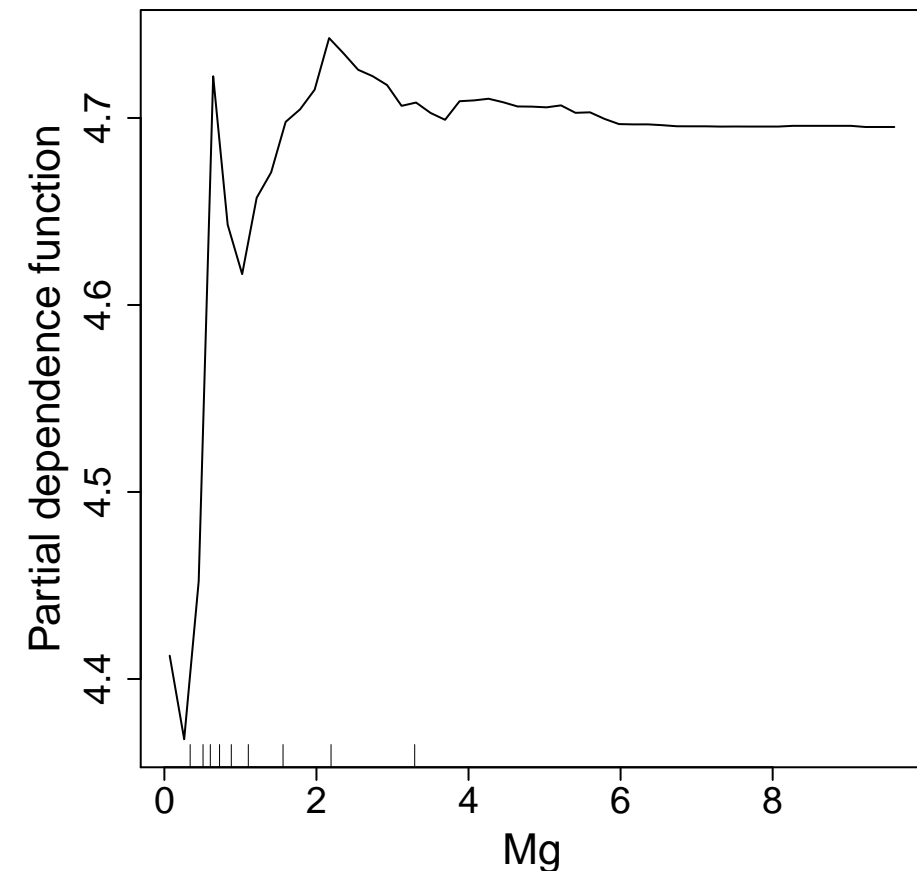**Yield**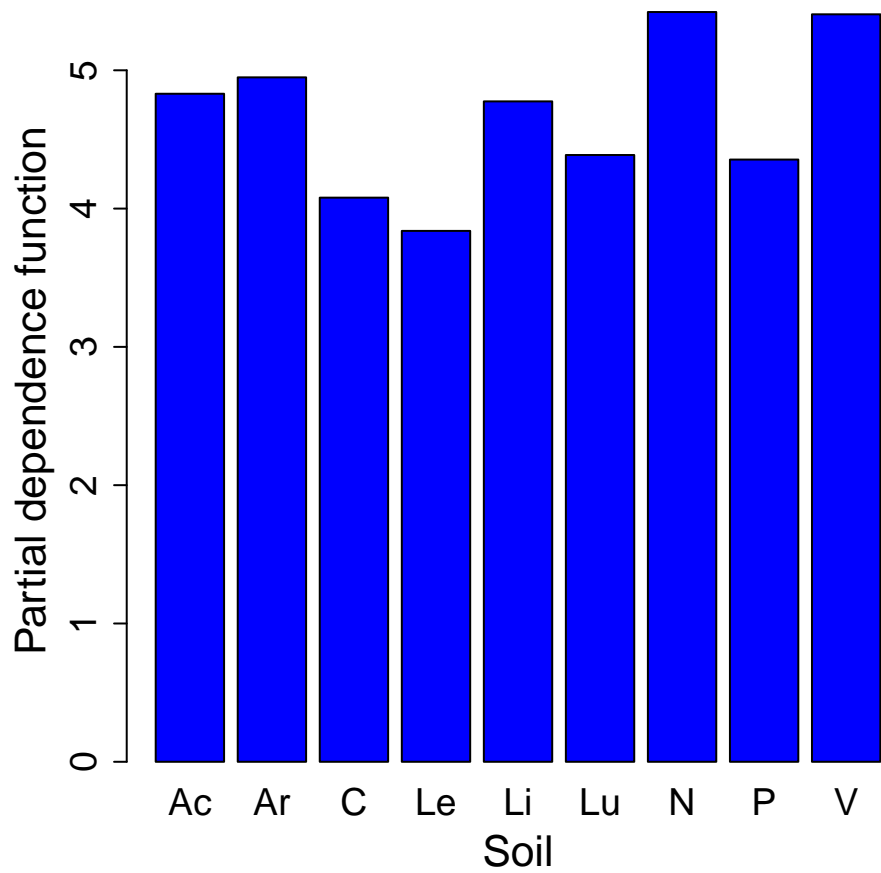**Yield**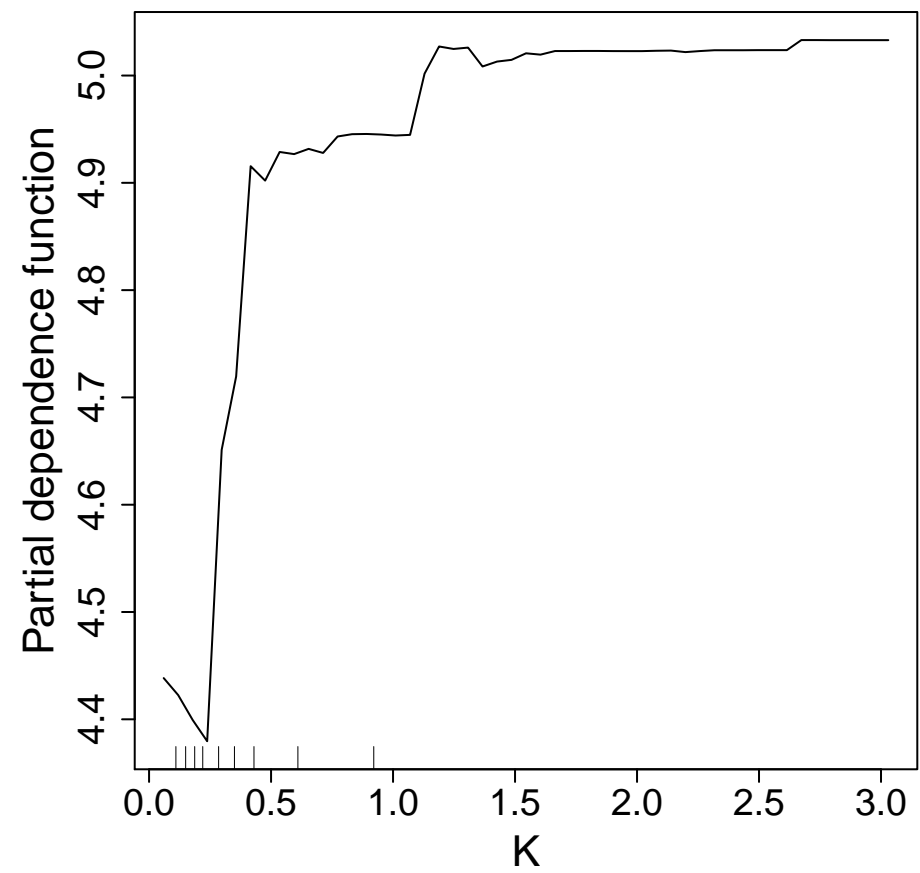

**YRN**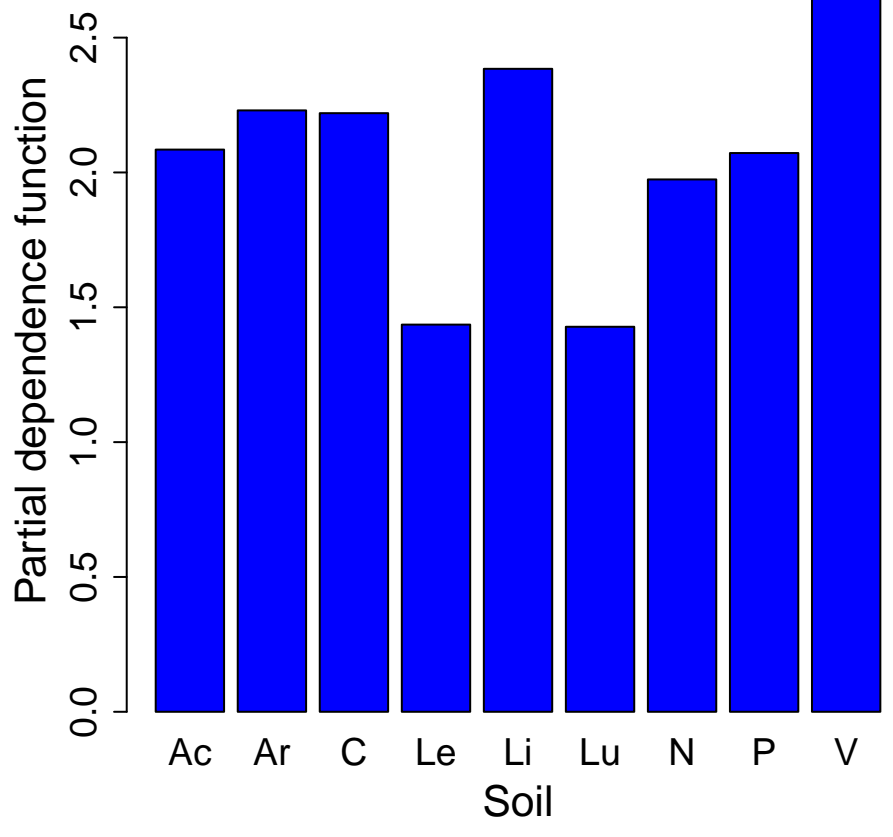**YRN**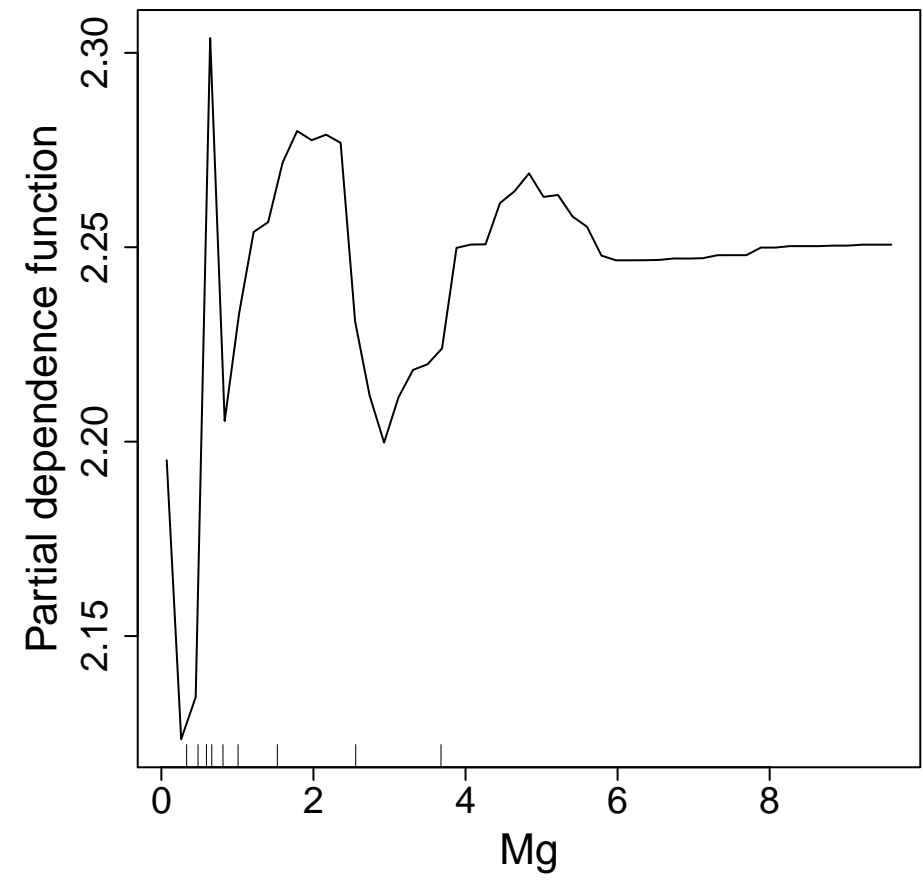**YRN**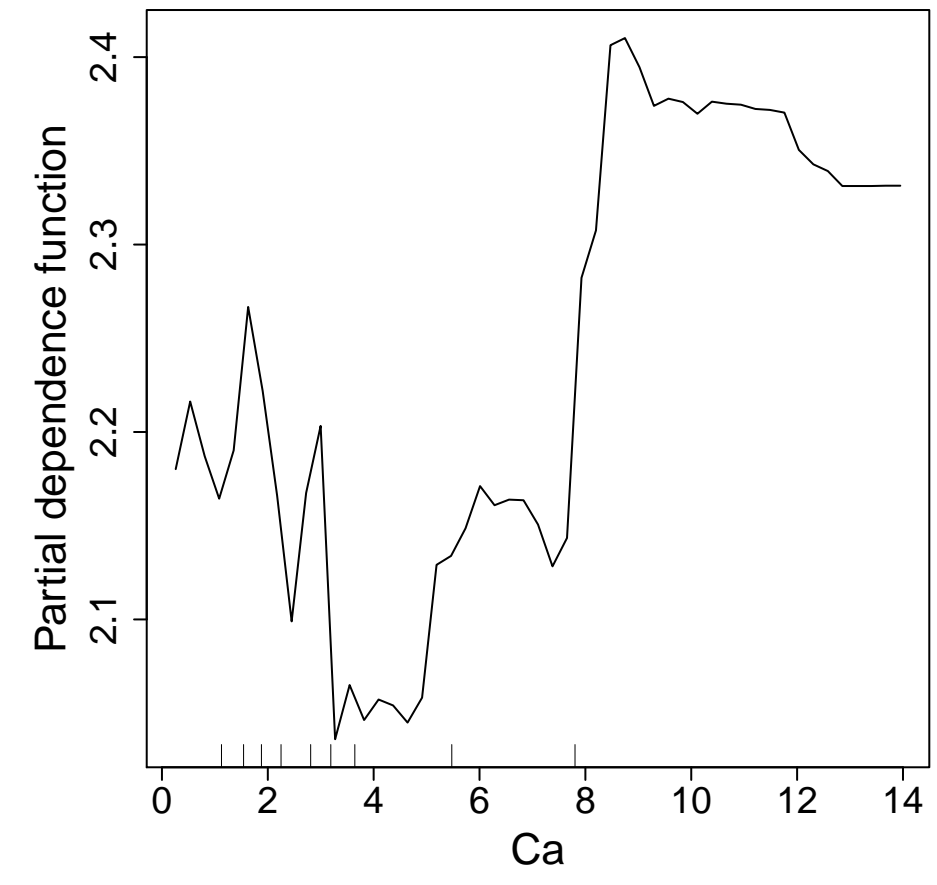**YRN**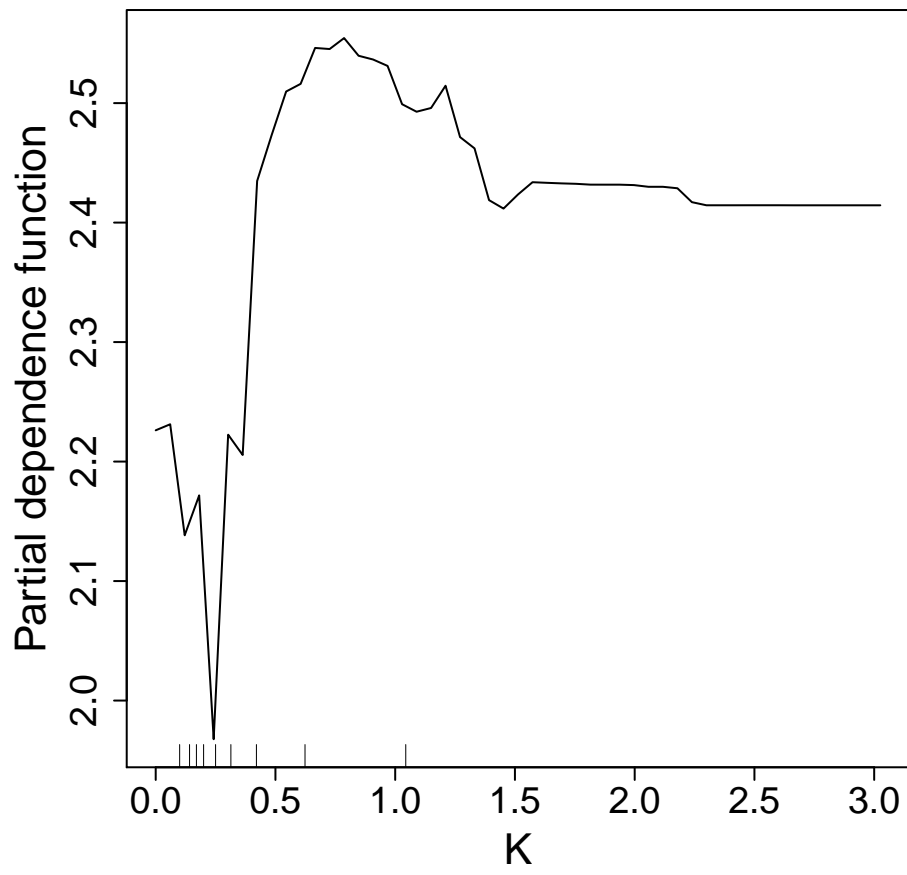**YRN**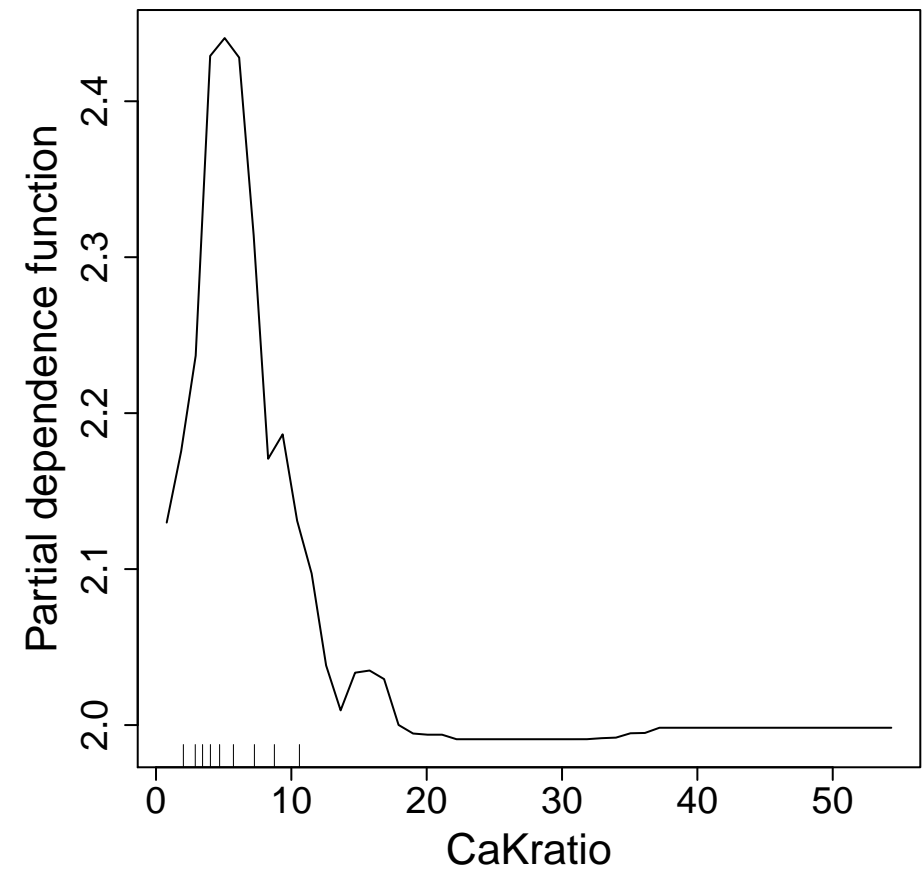

**YRP**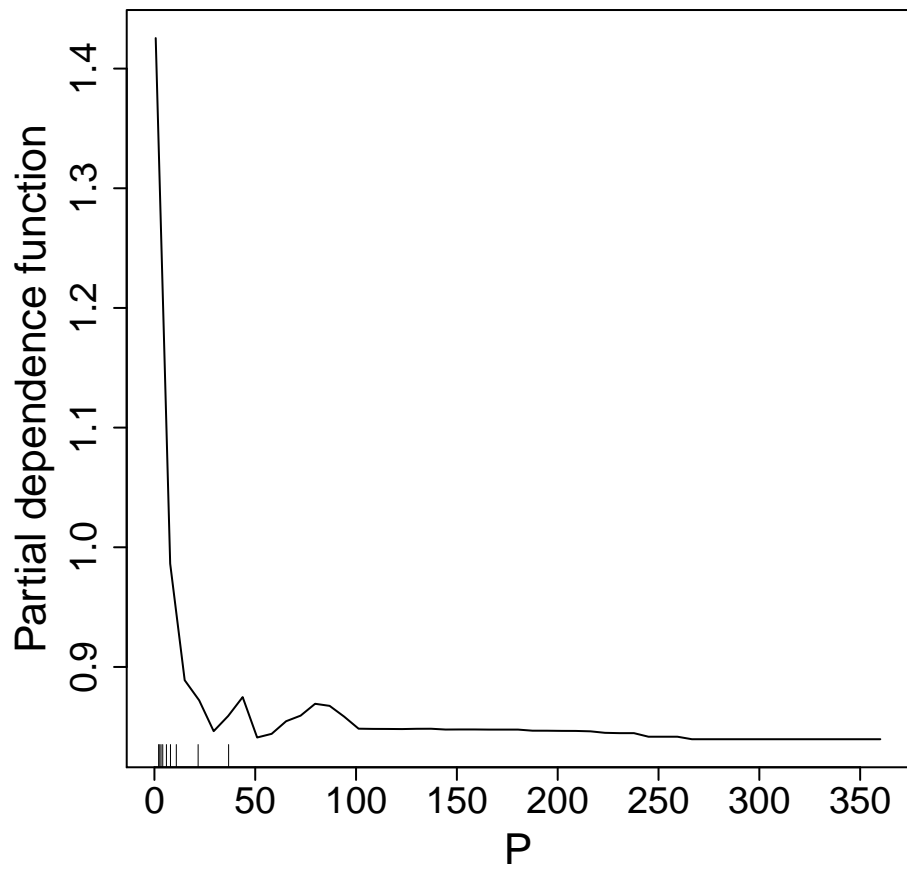**YRP**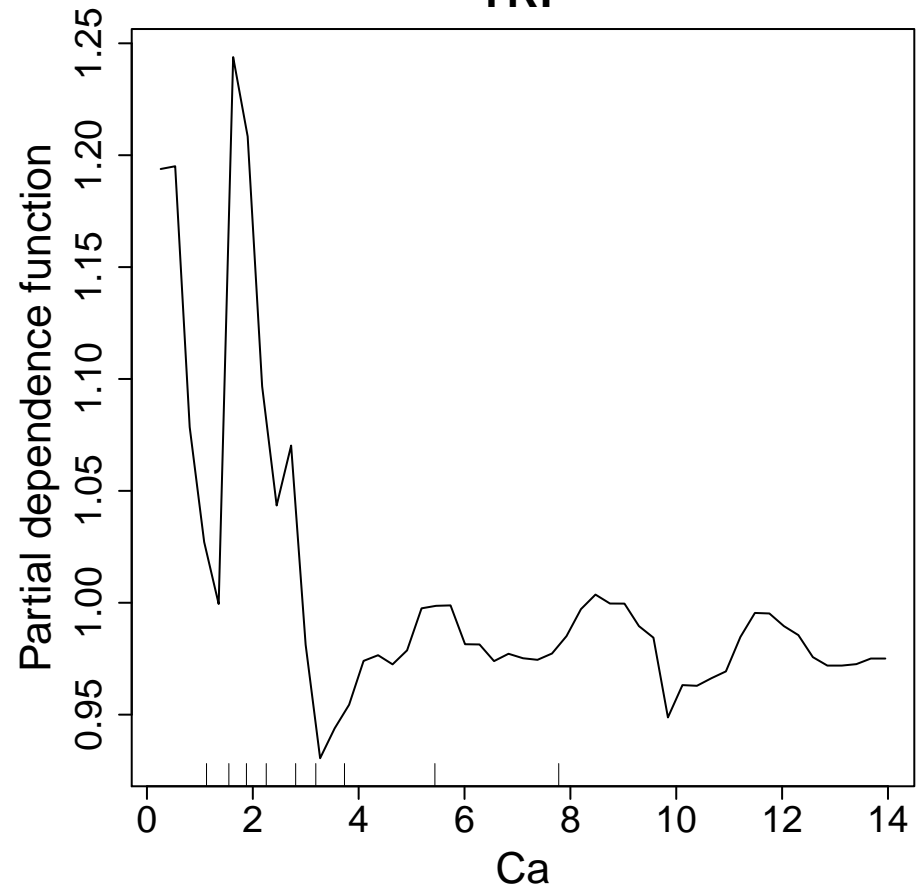**YRP**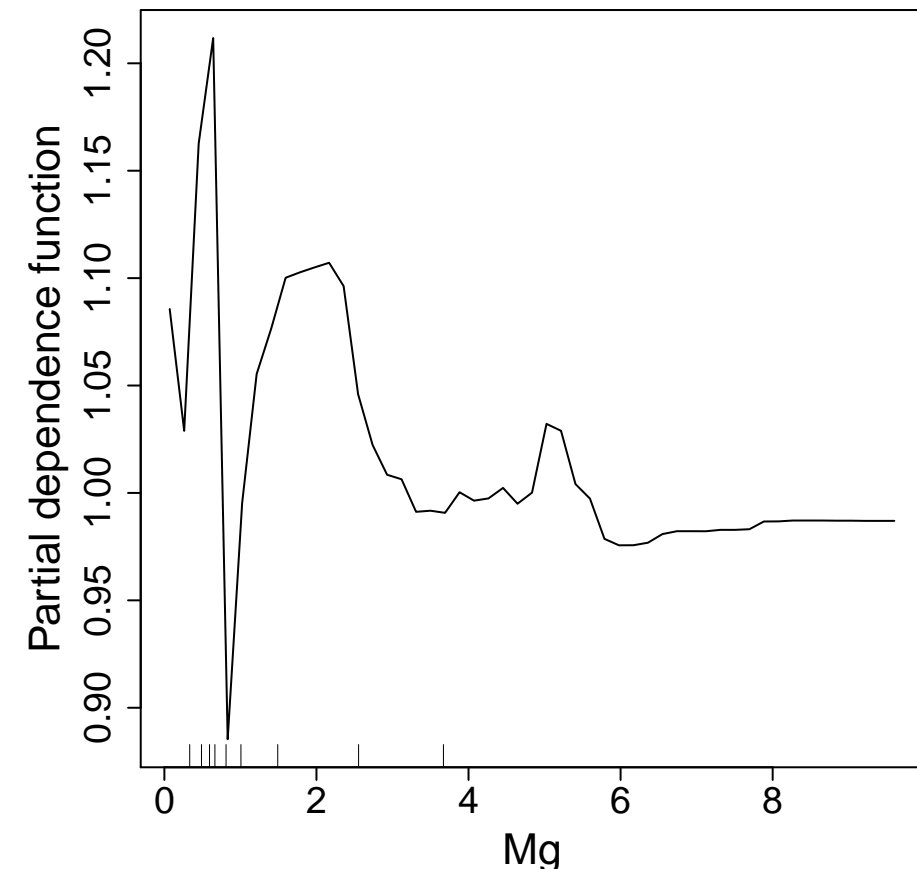**YRP**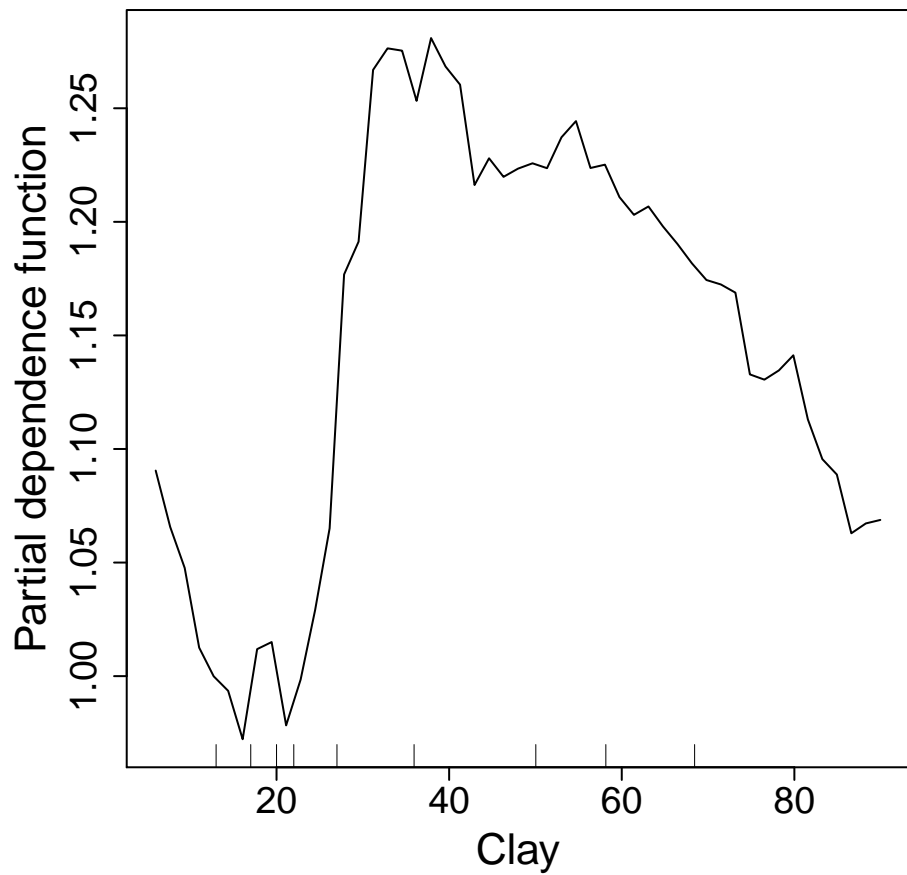**YRP**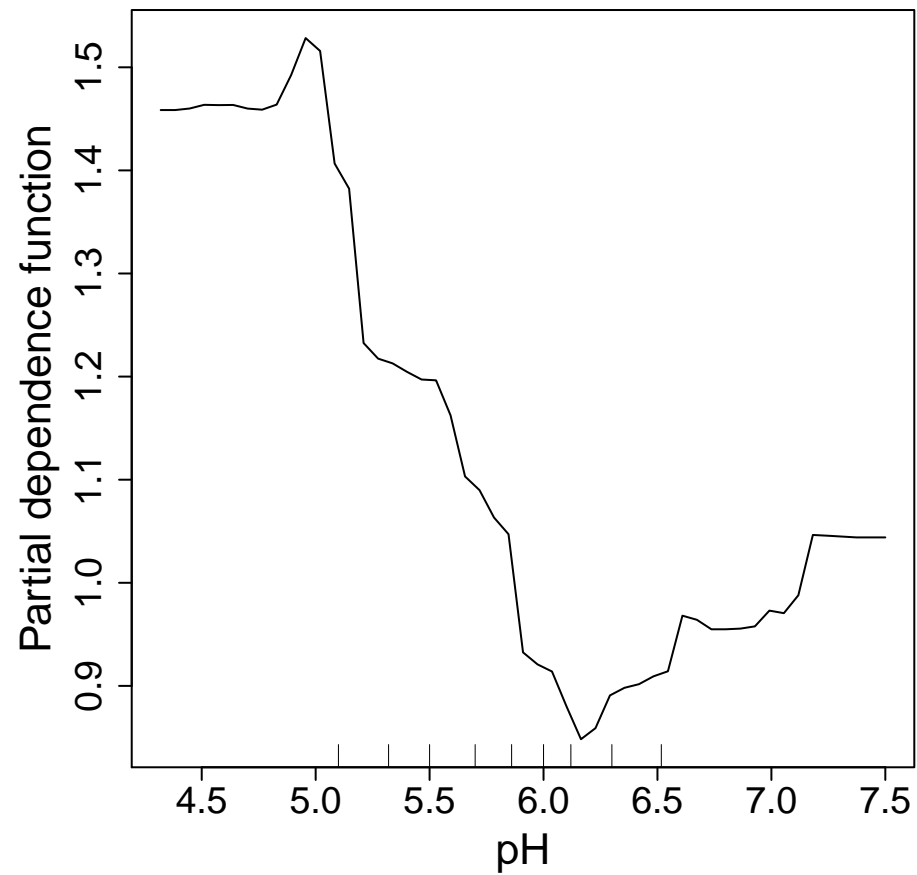

**YRK**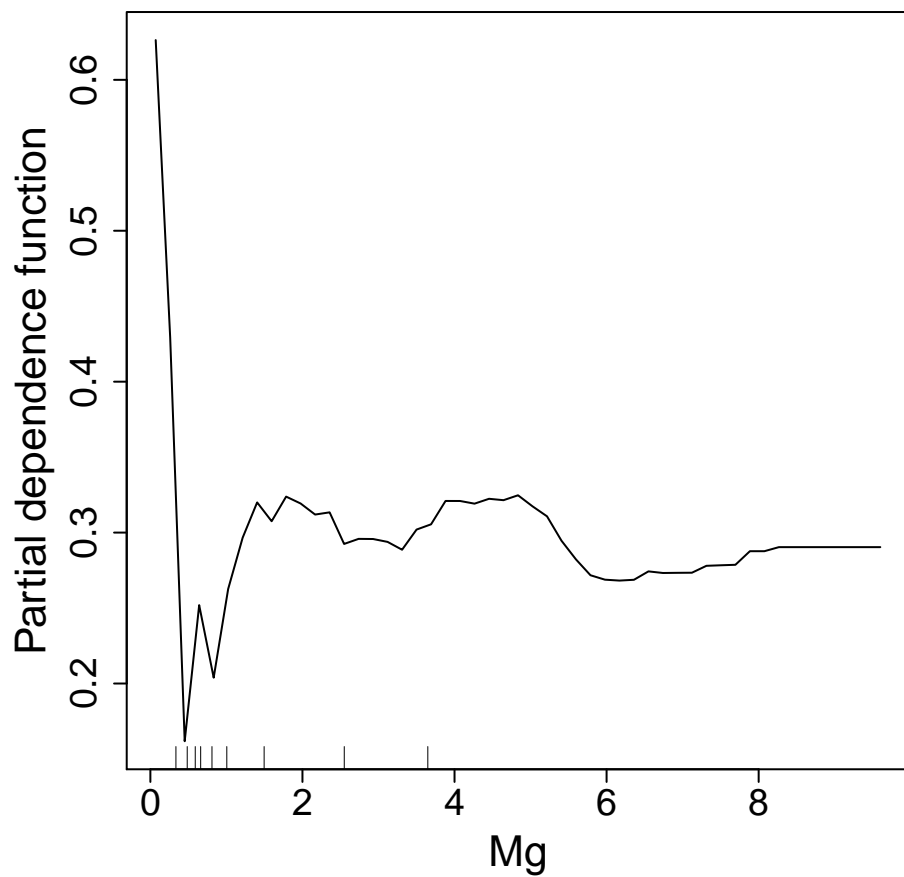**YRK**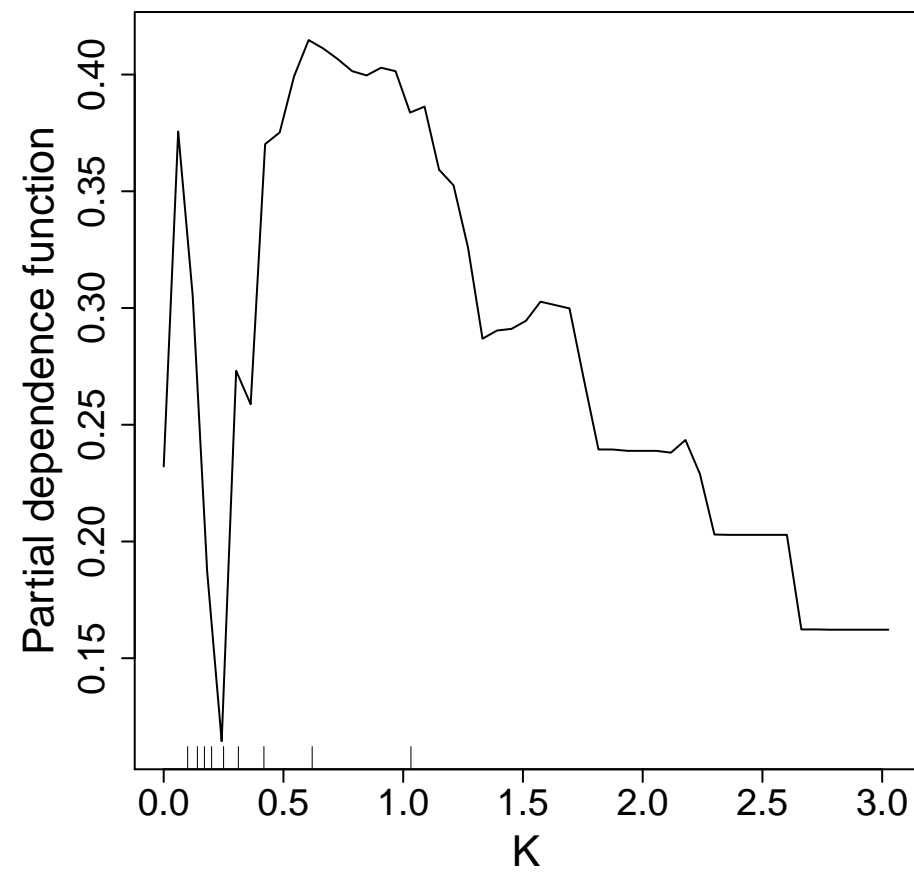**YRK**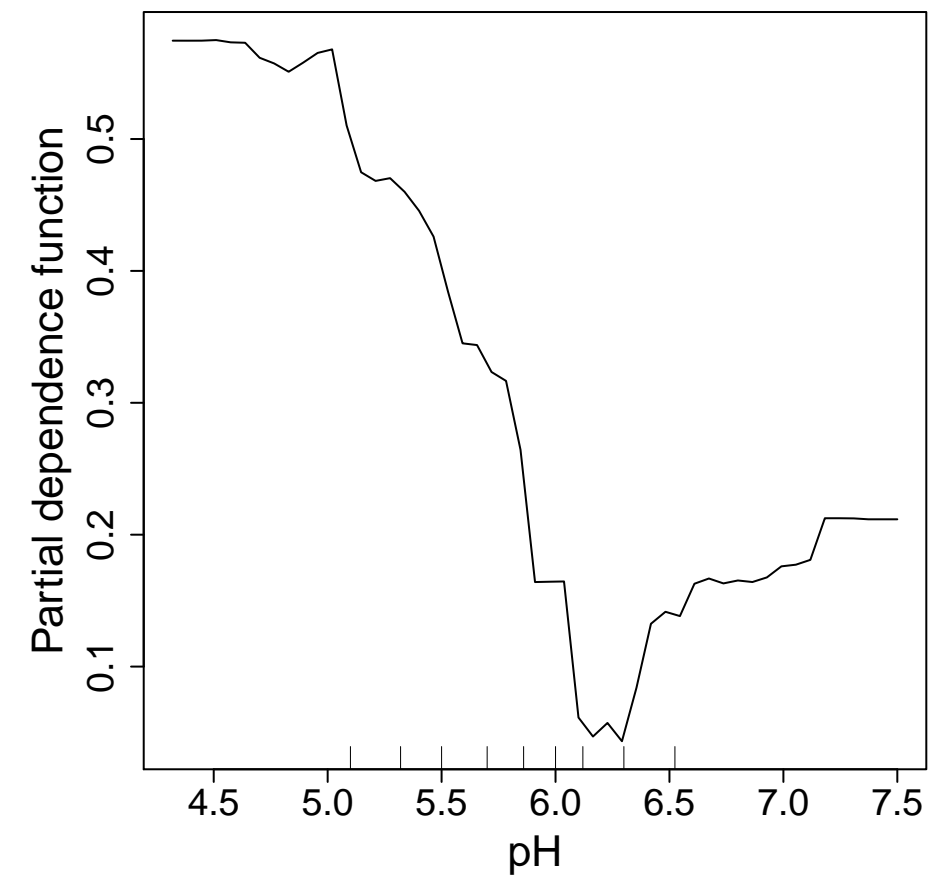**YRK**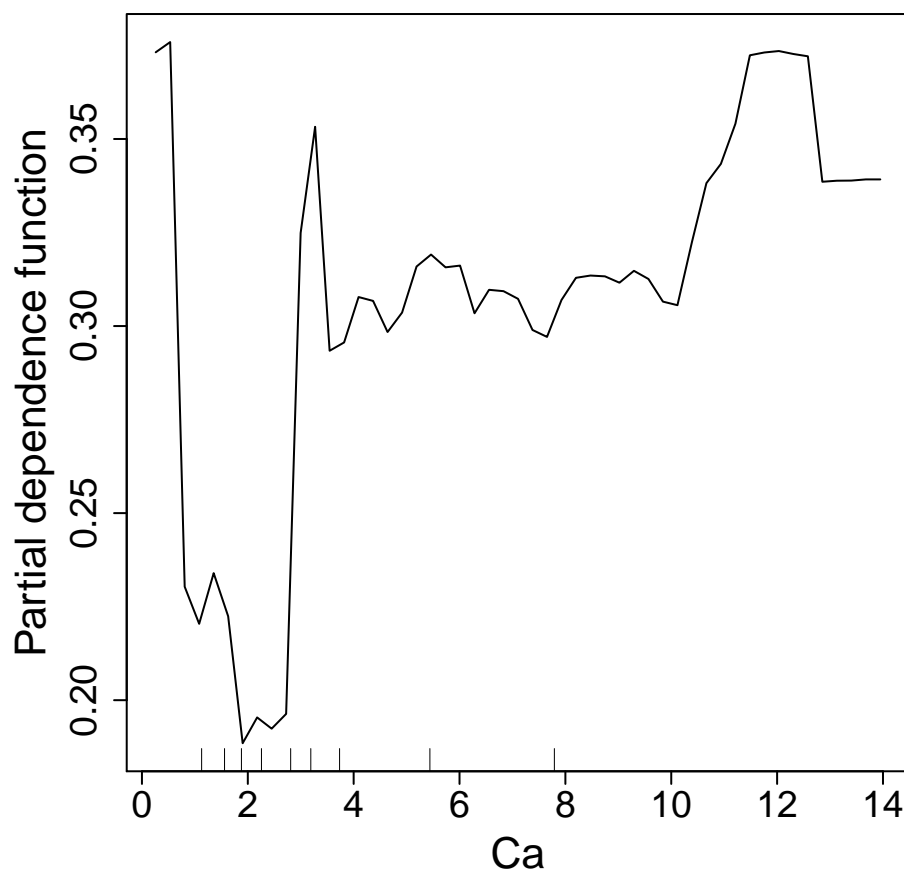**YRK**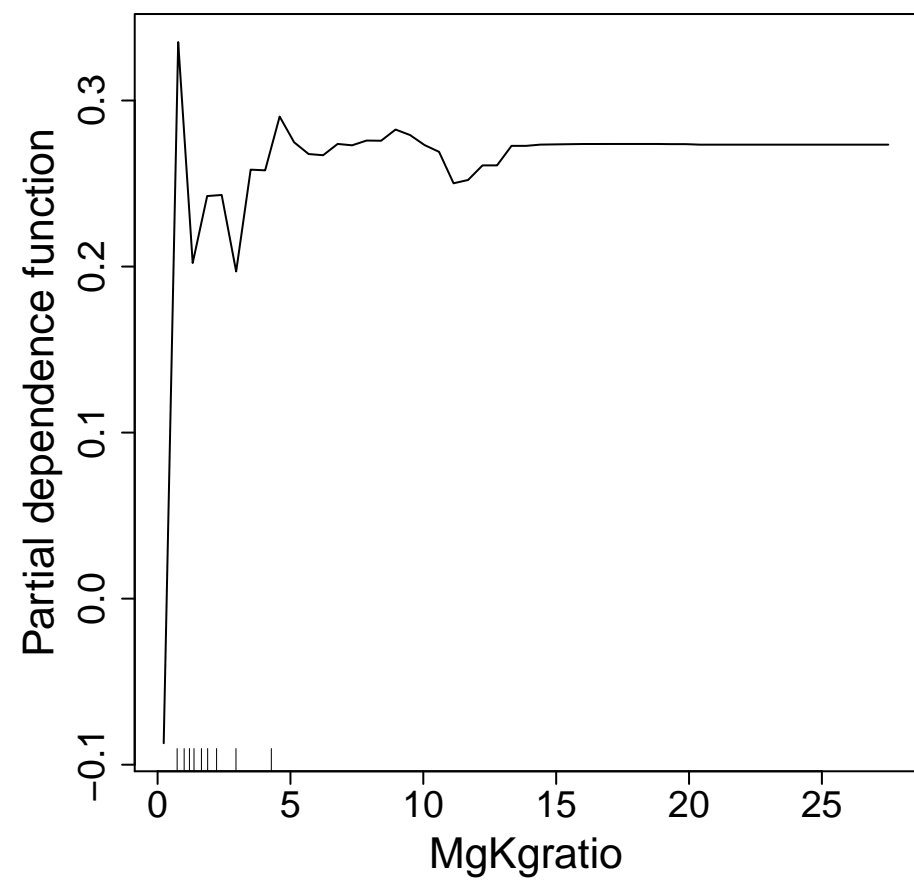

**AEN**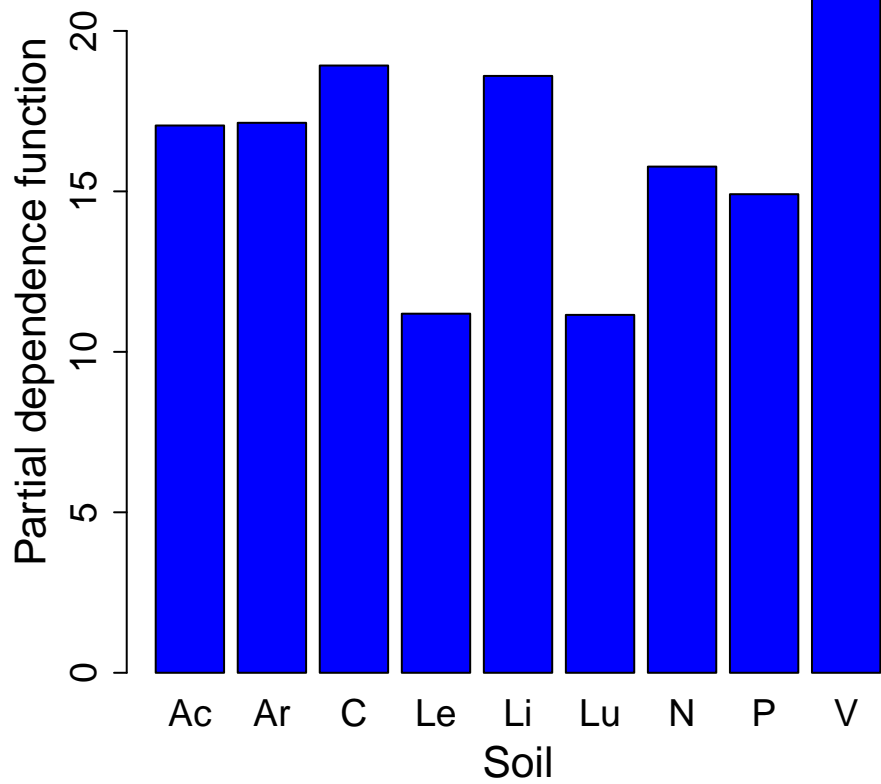**AEN**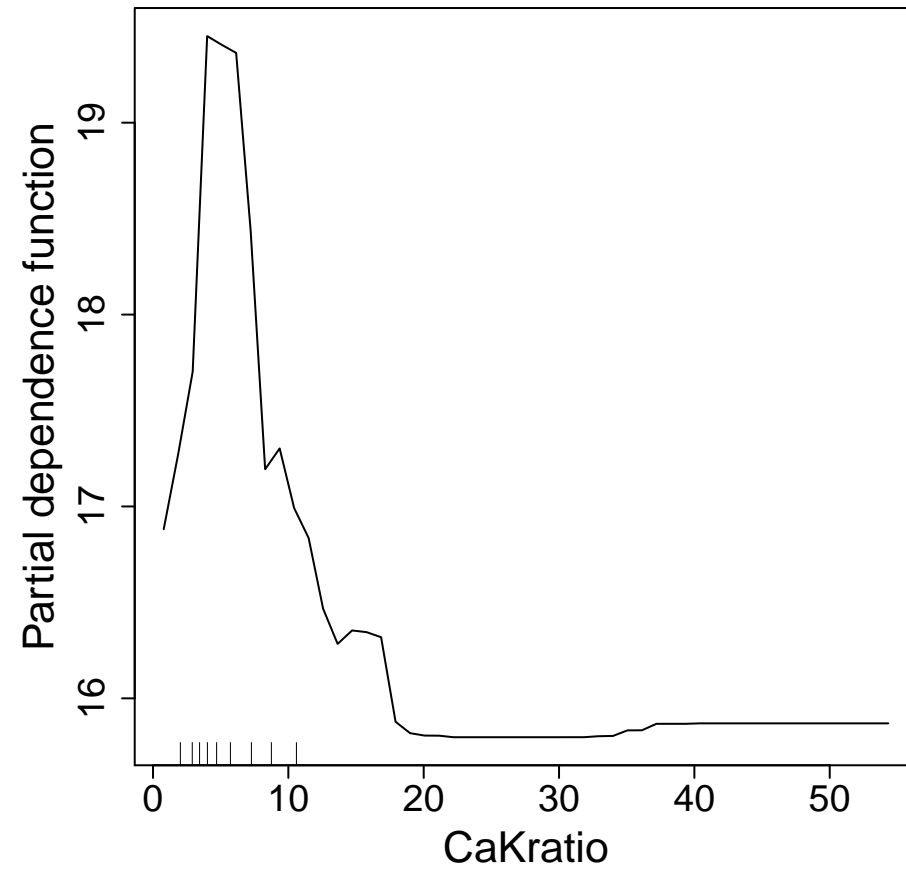**AEN**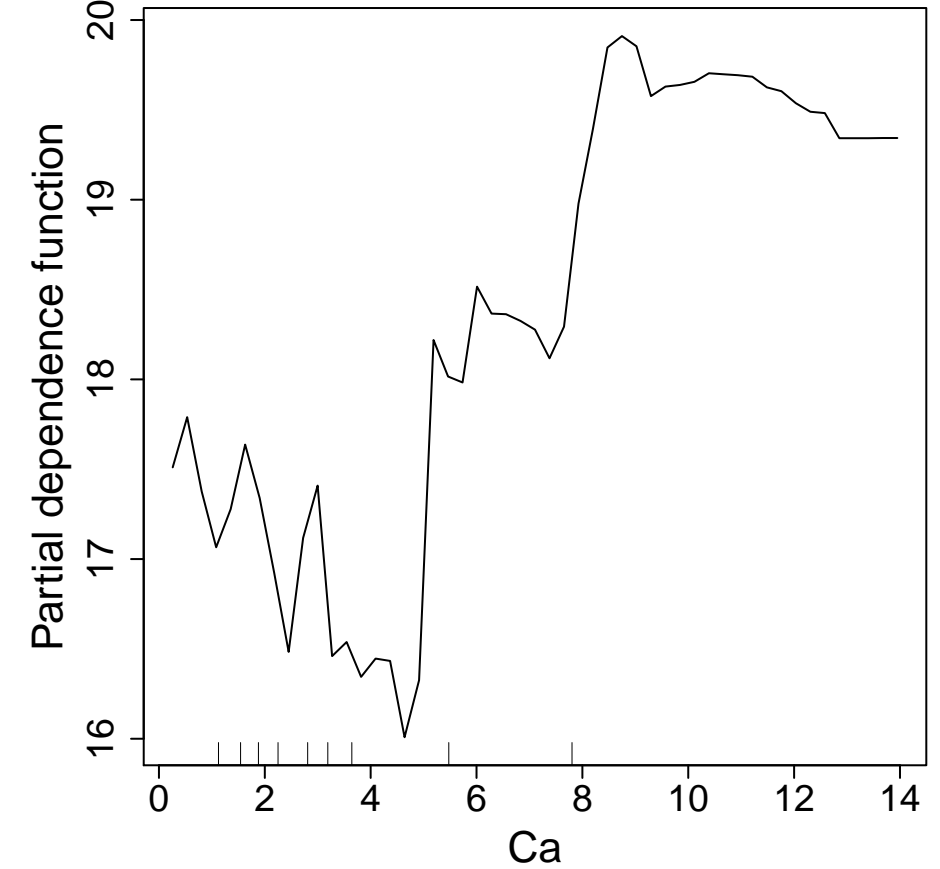**AEN**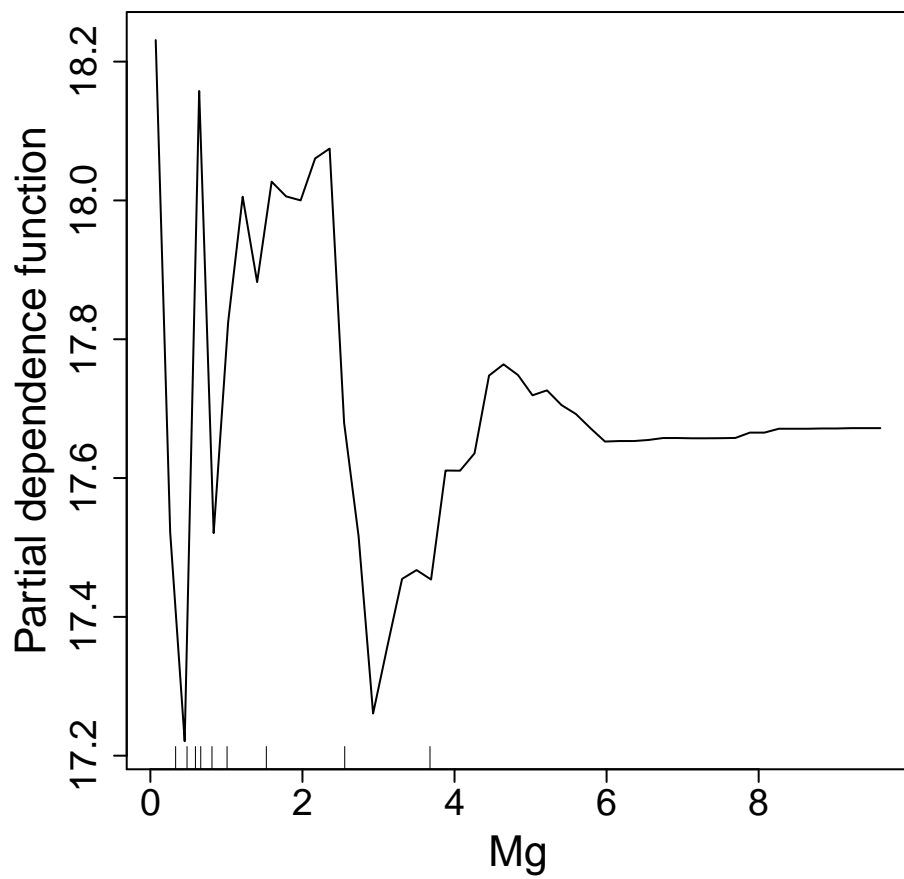**AEN**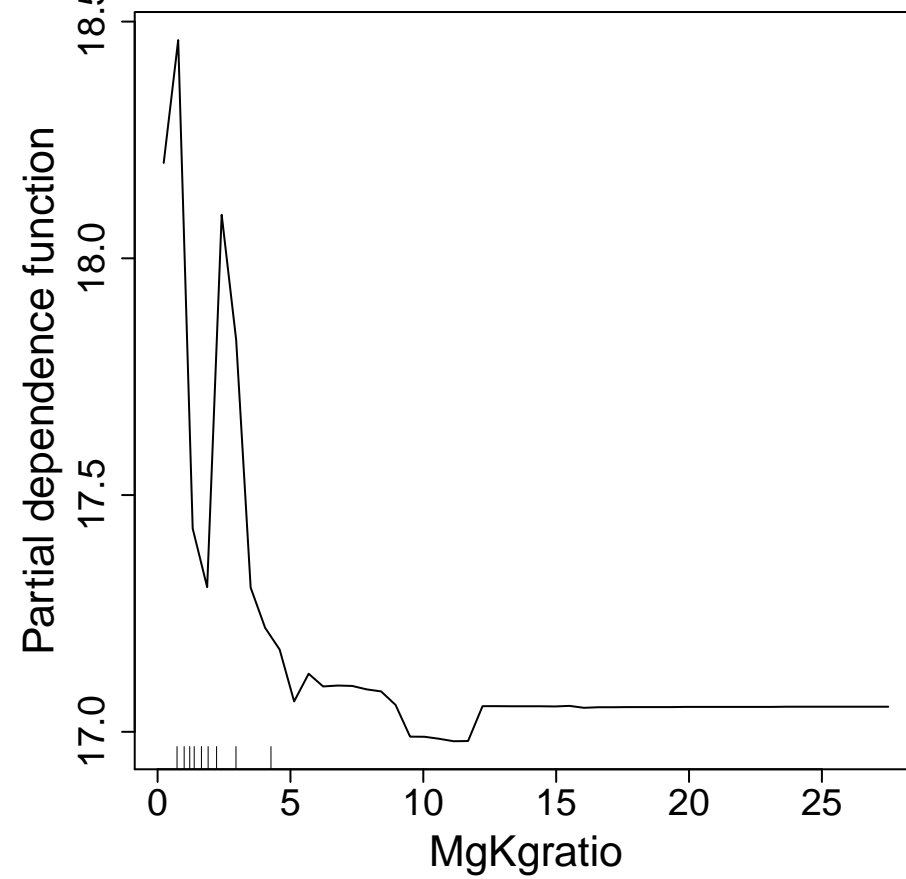

**AEP**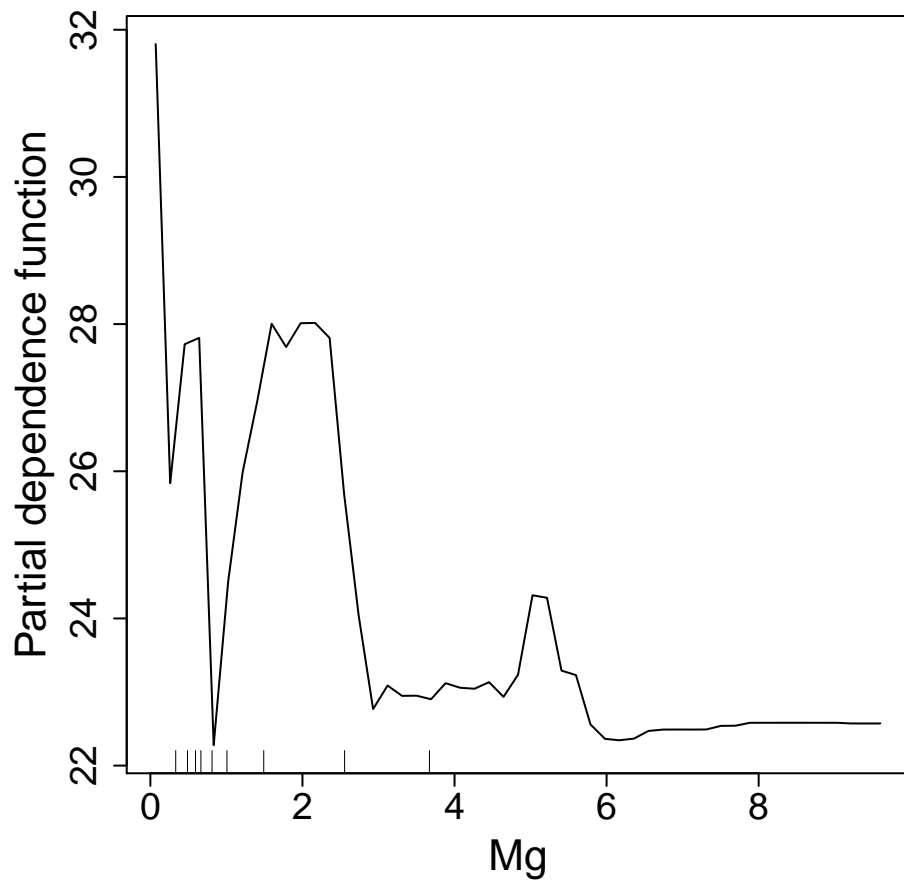**AEP**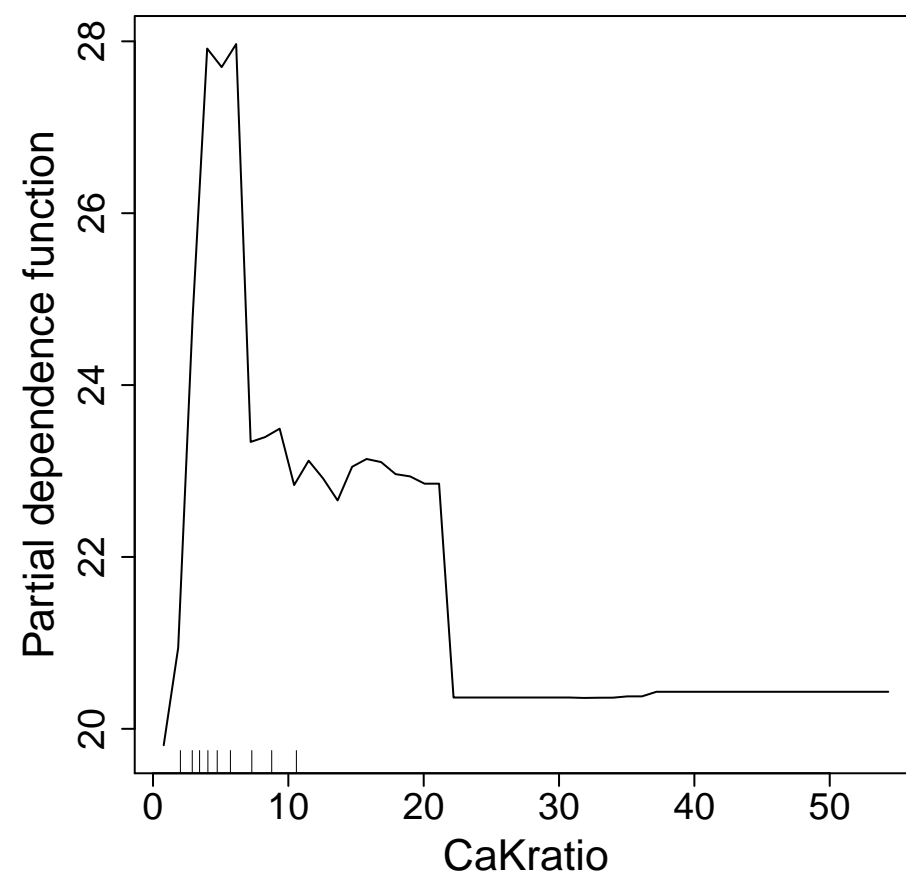**AEP**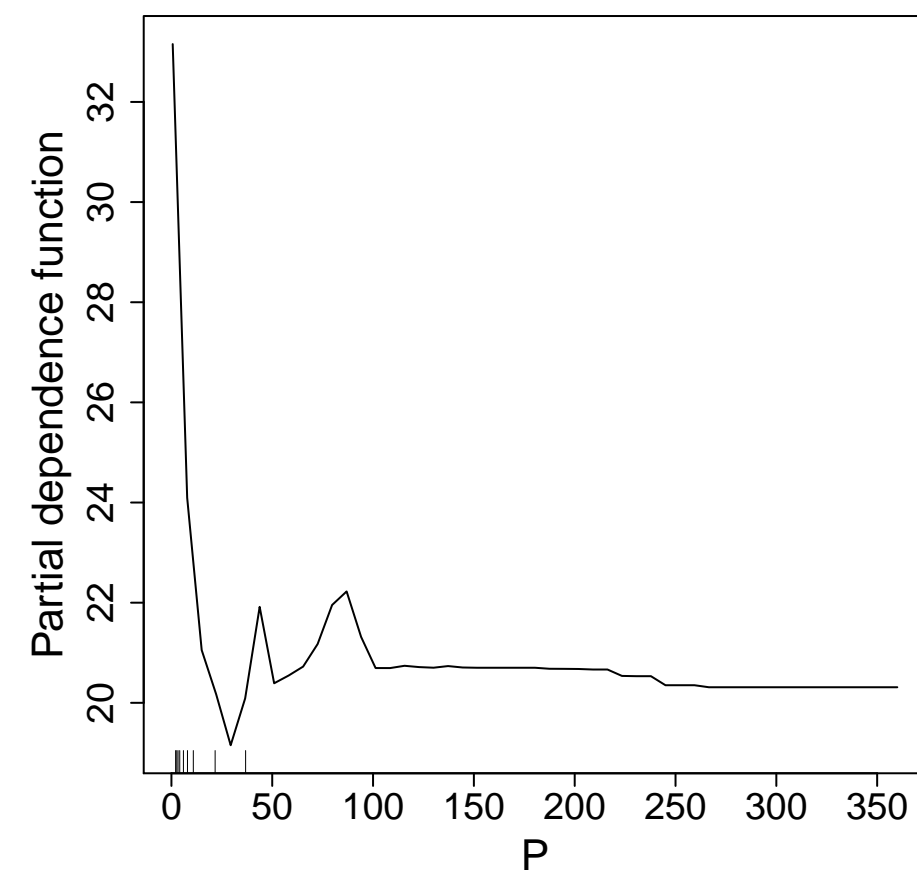**AEP**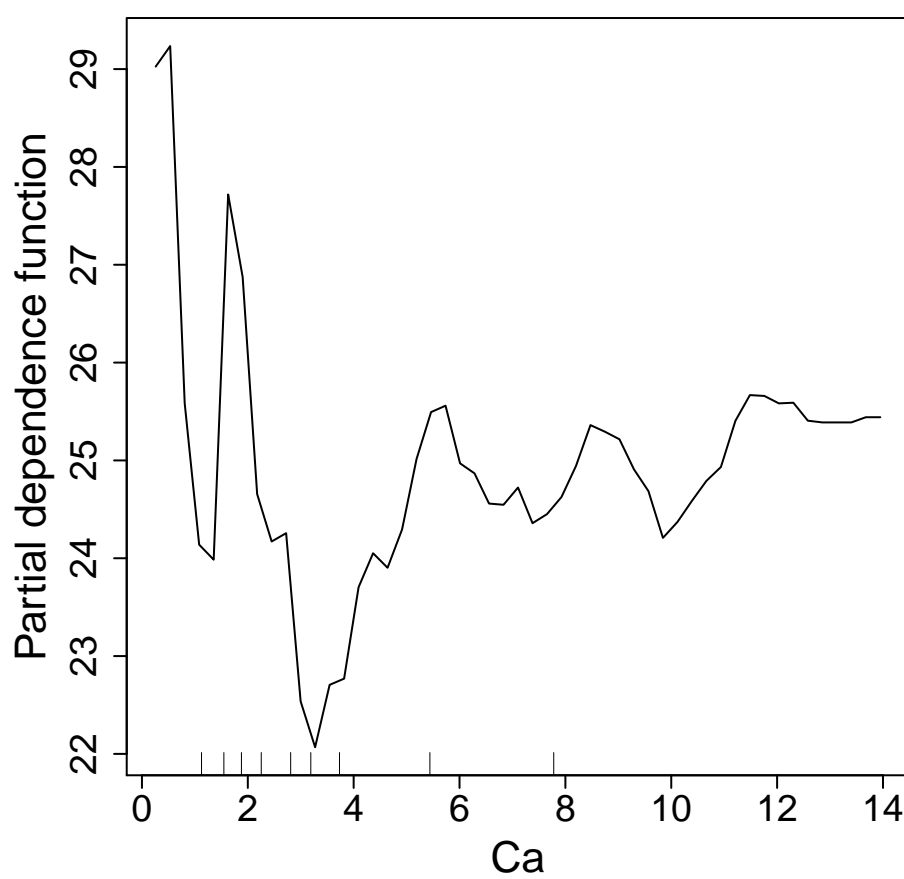**AEP**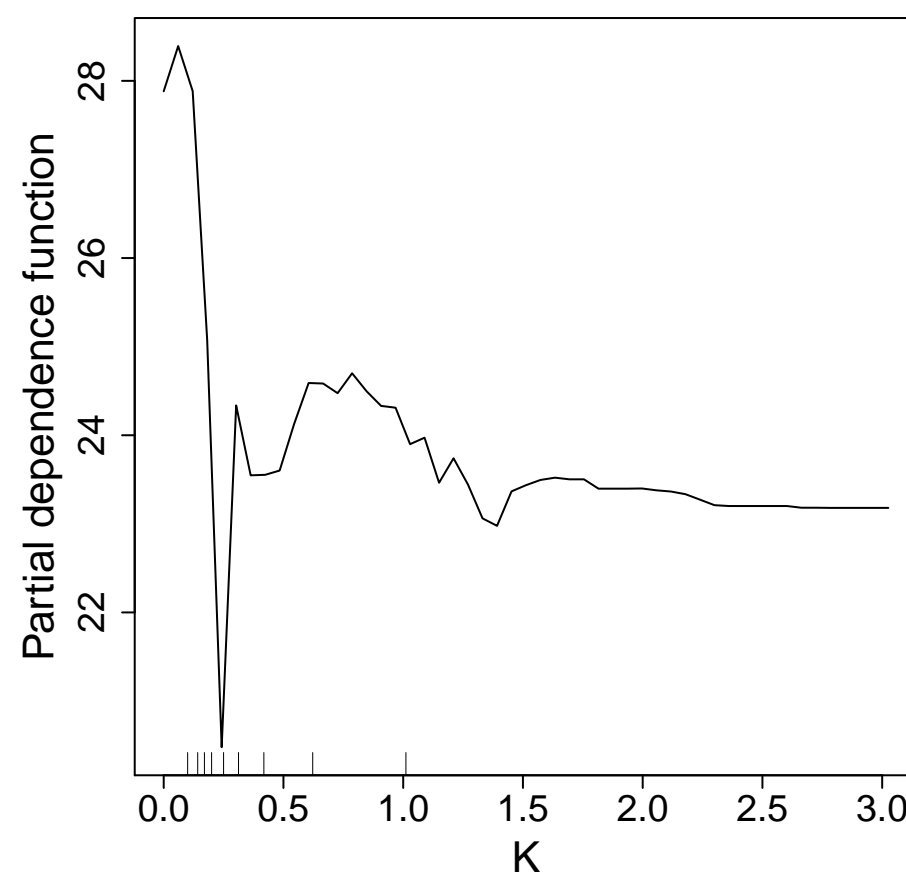

**AEK**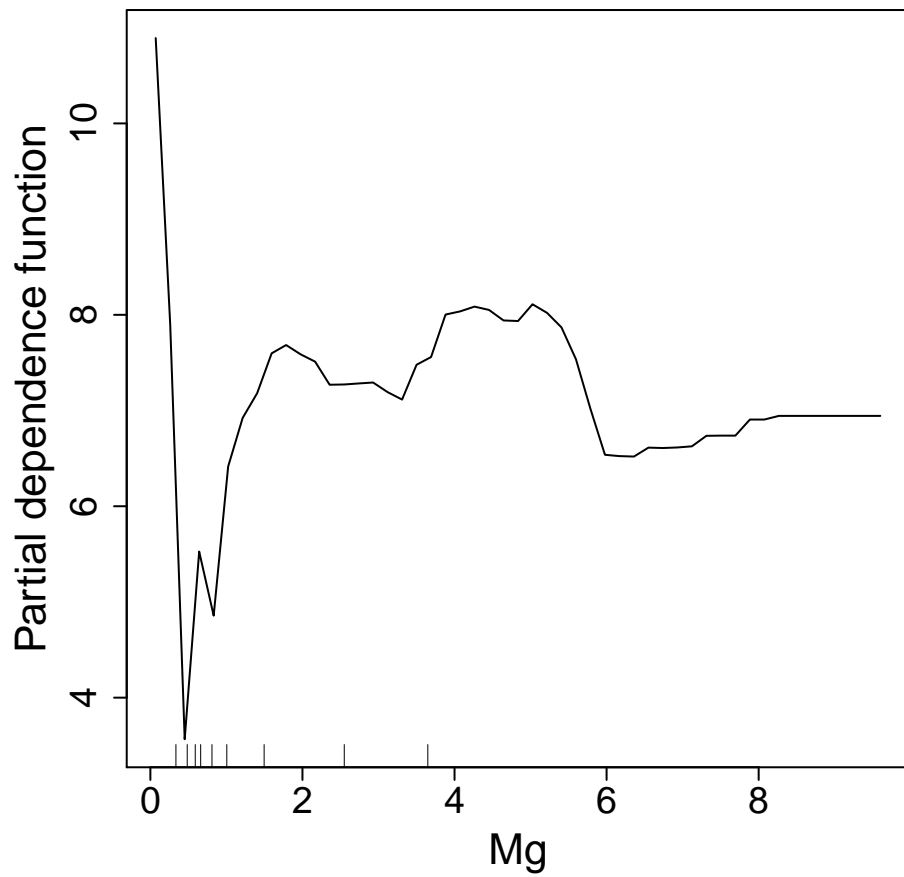**AEK**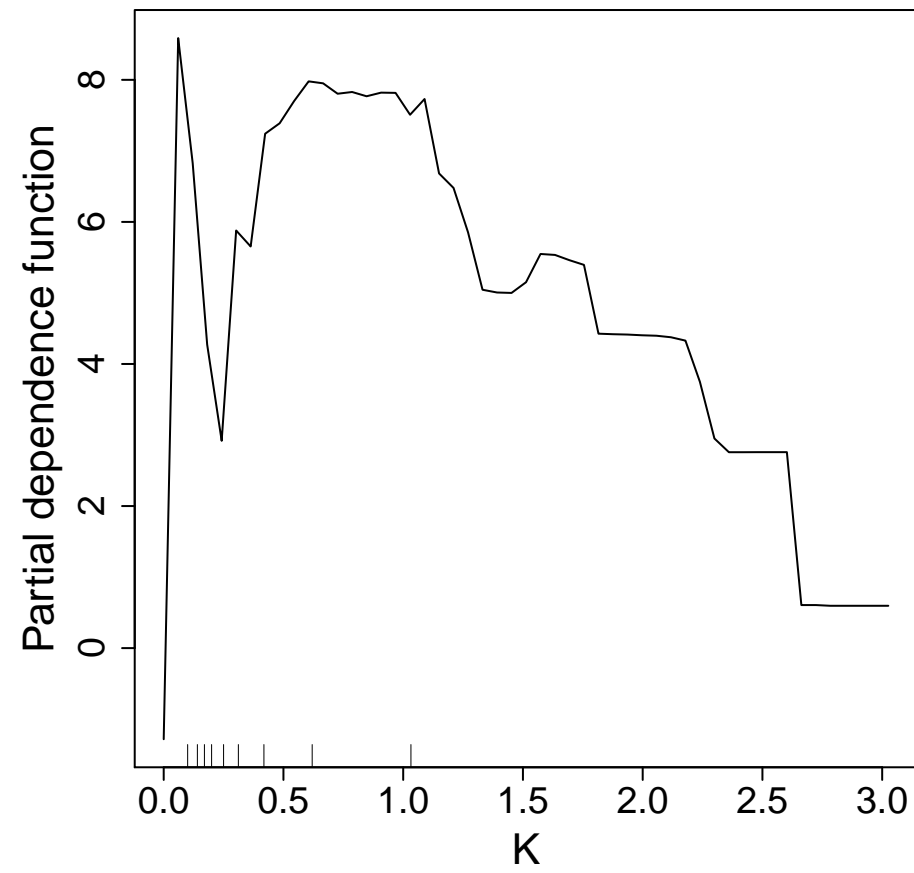**AEK**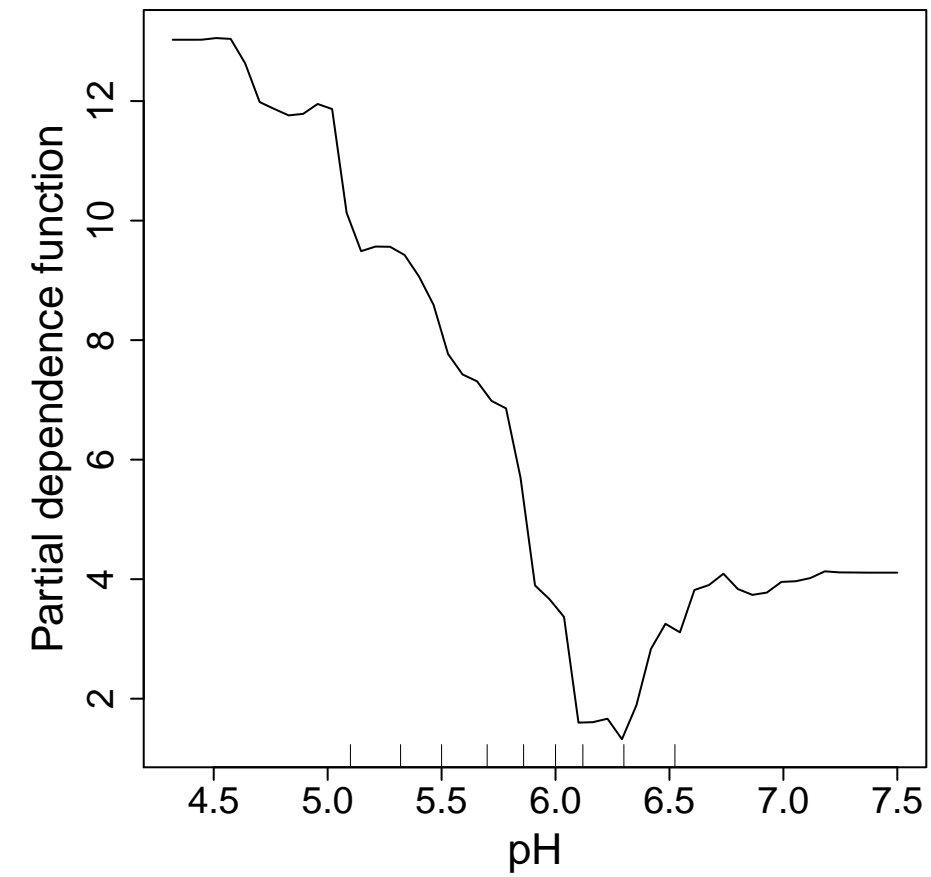**AEK**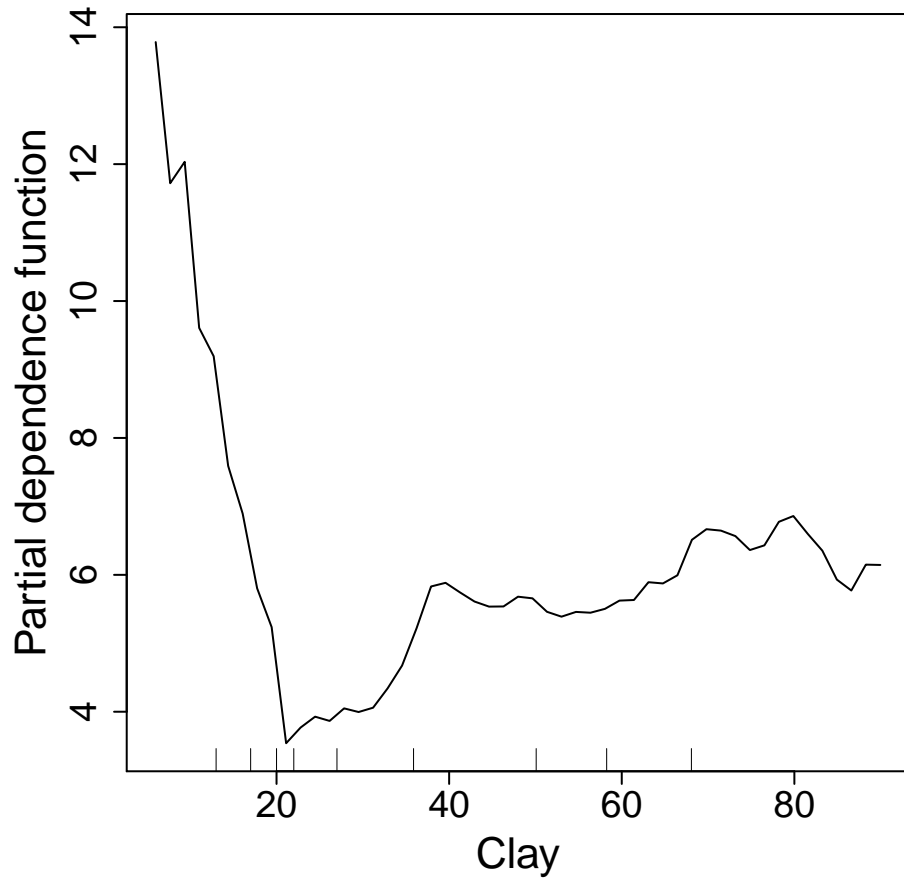**AEK**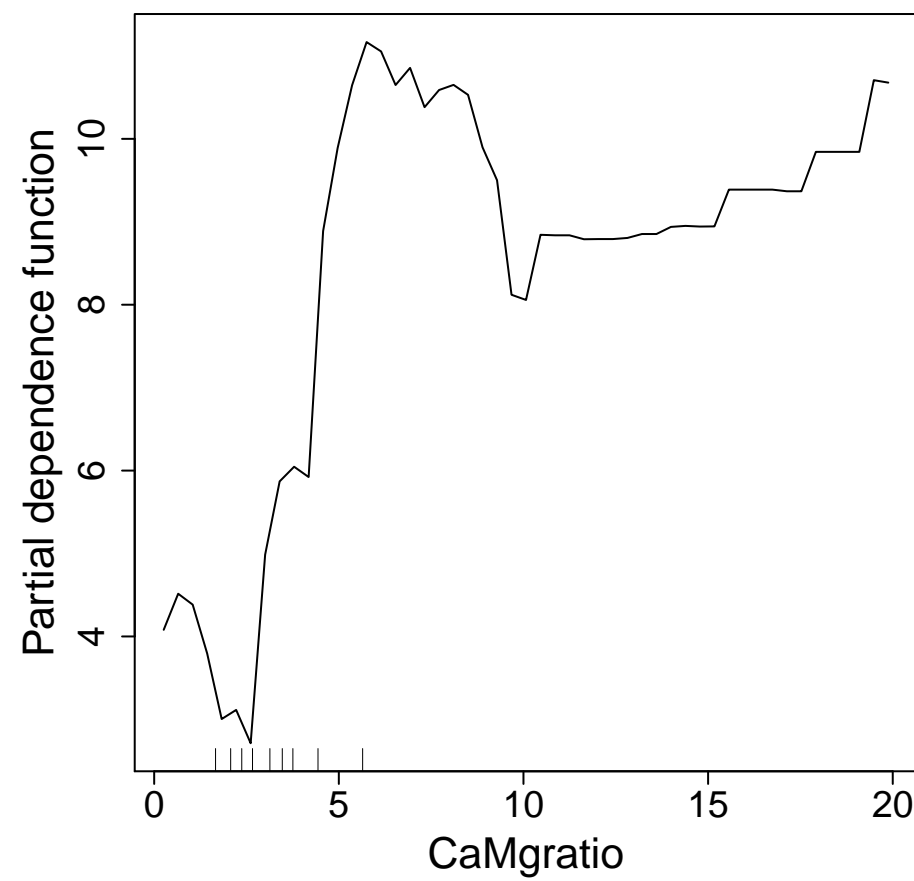

Supplement: MOESM4 [file 13593_2022_821_MOESM4_ESM.pdf]
