# Supplementary material for: Novel insights into factors associated with yield response and nutrient use efficiency of maize and rice in sub-Saharan Africa. A review
Source: Springer Nature journal article supplement (doi:10.1007/s13593-022-00821-4), 2022-08-22

**Yield\_IL**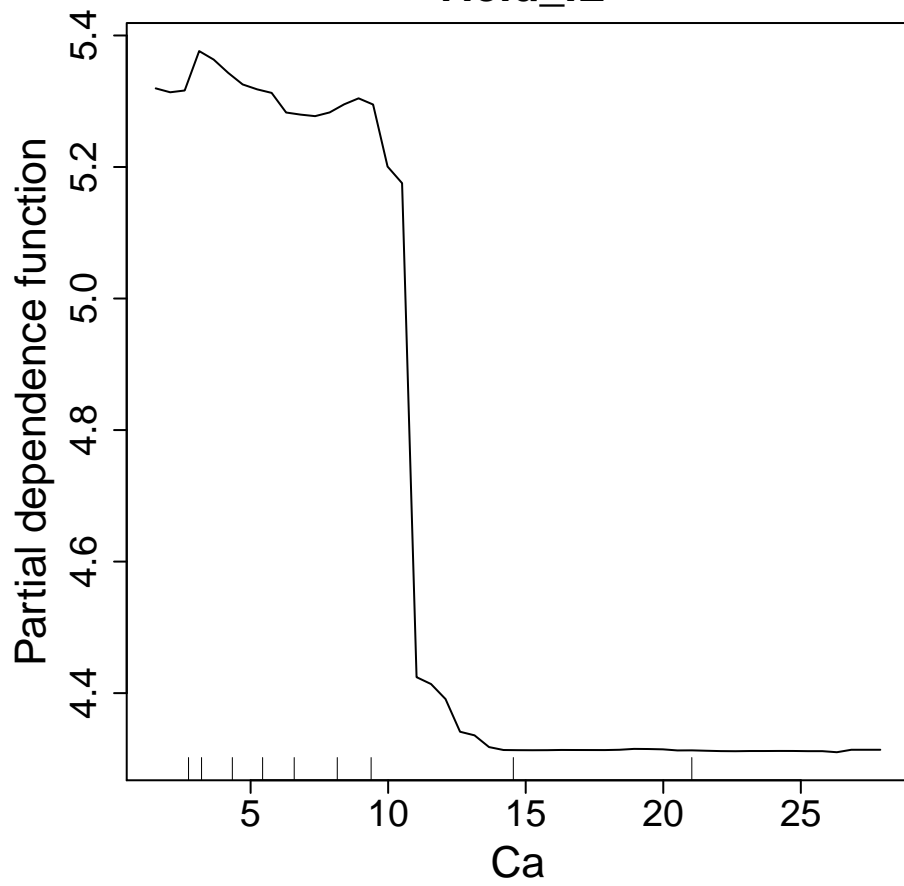**Yield\_IL**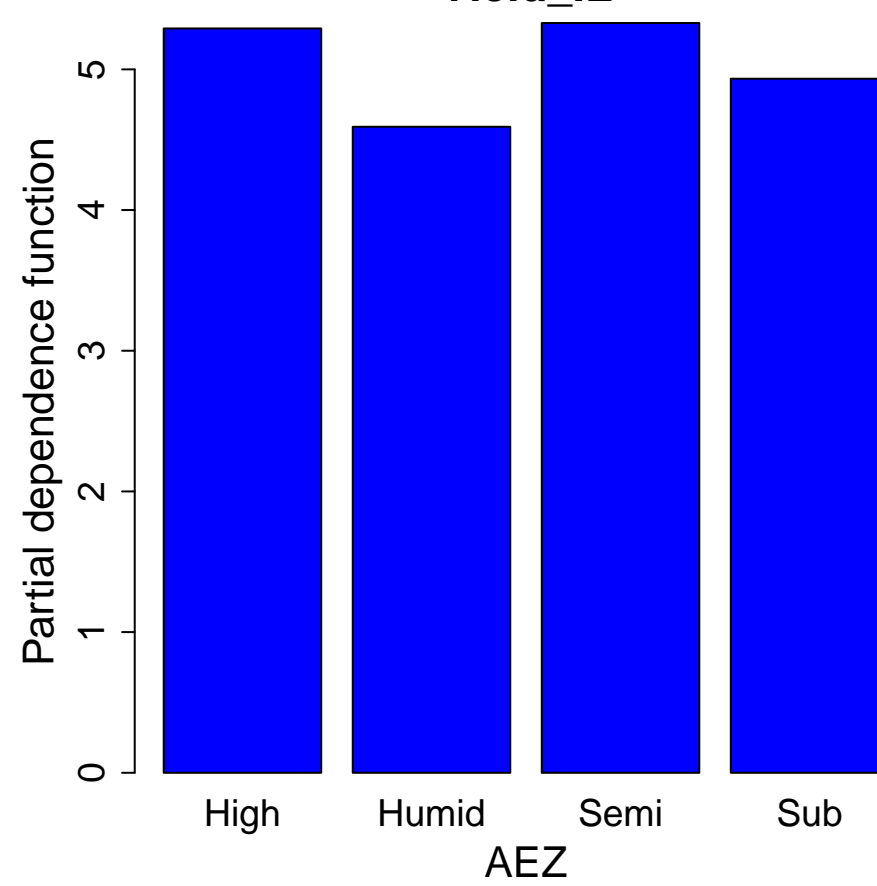**Yield\_IL**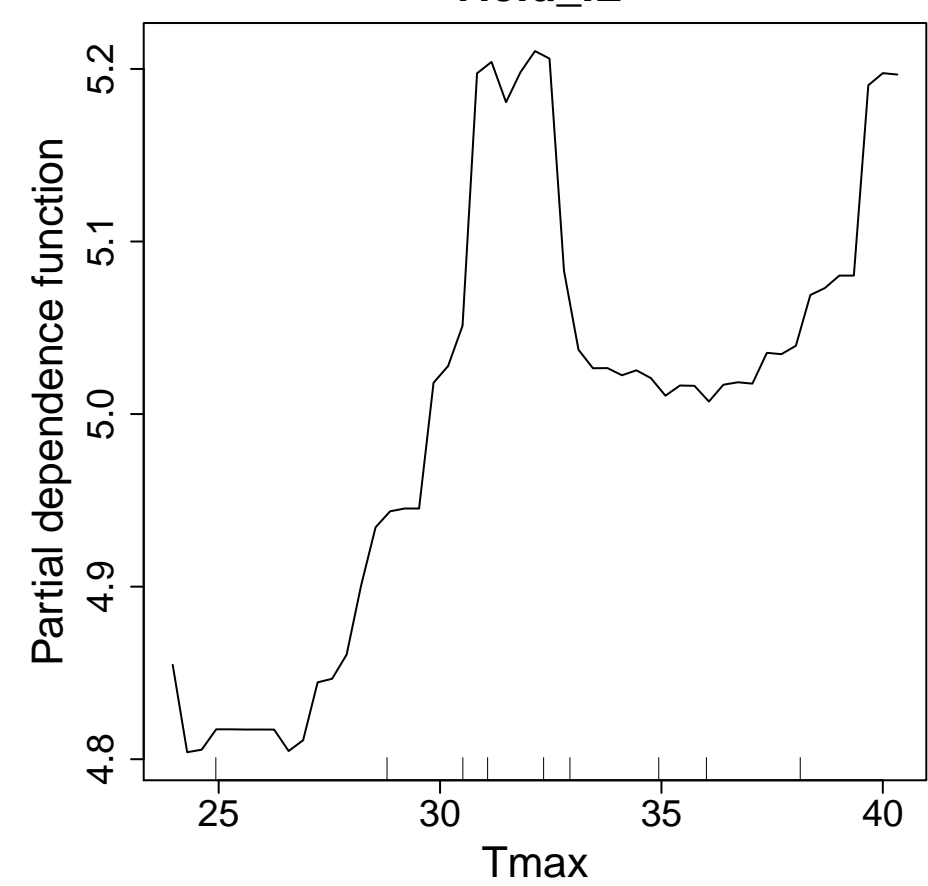**Yield\_IL**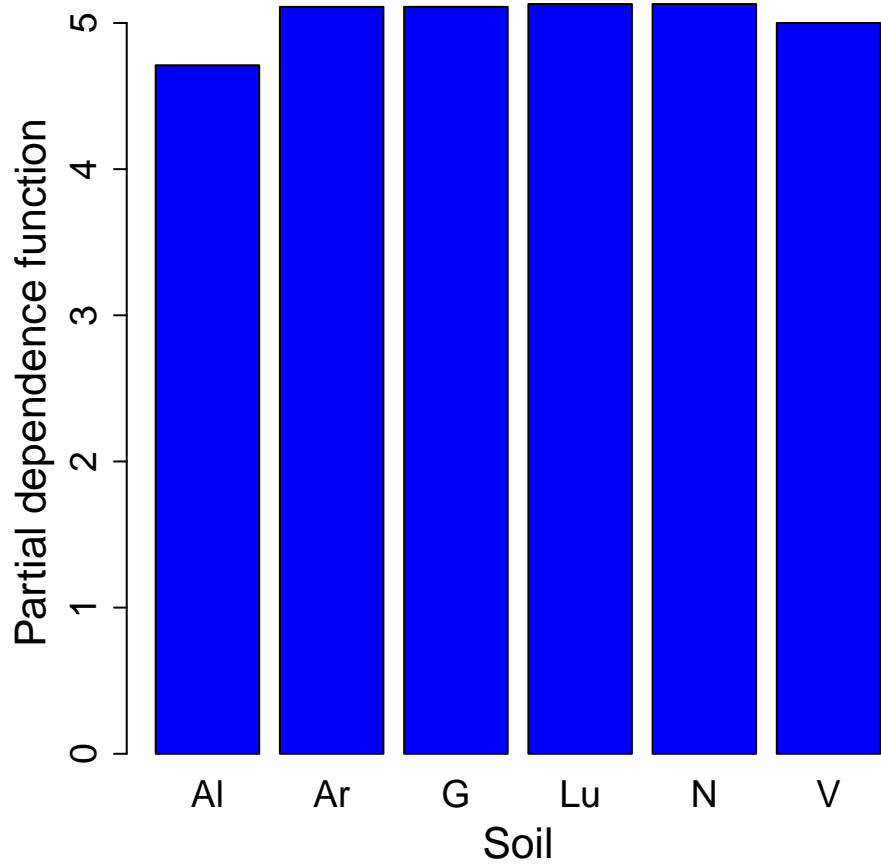**Yield\_IL**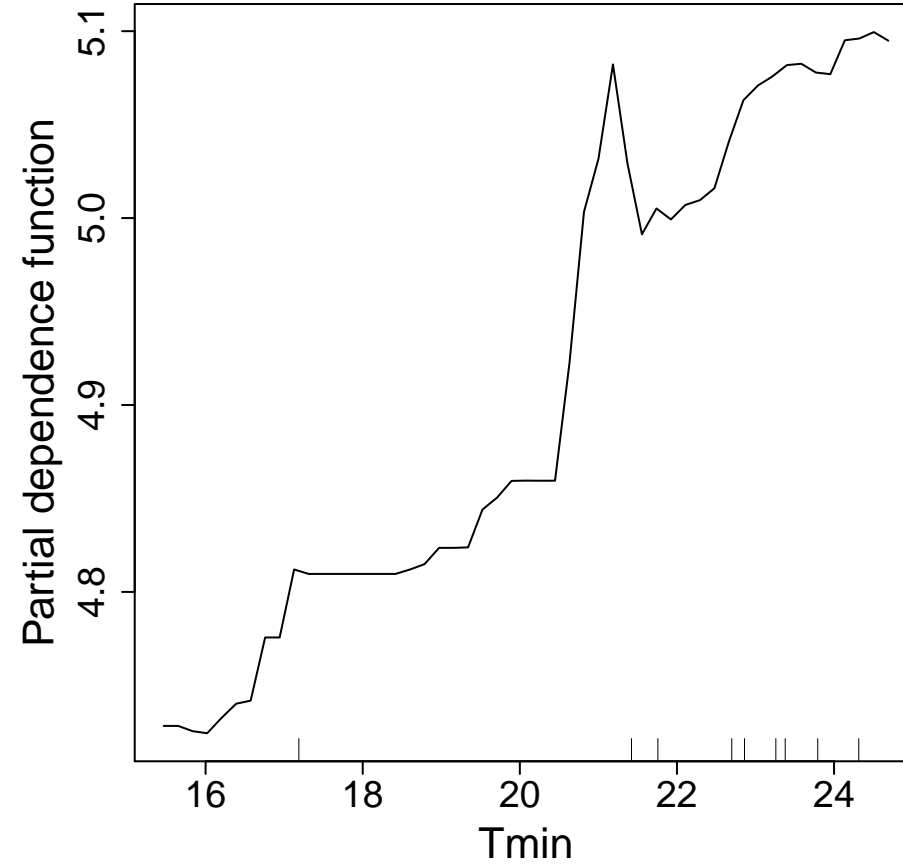

Yield\_RL

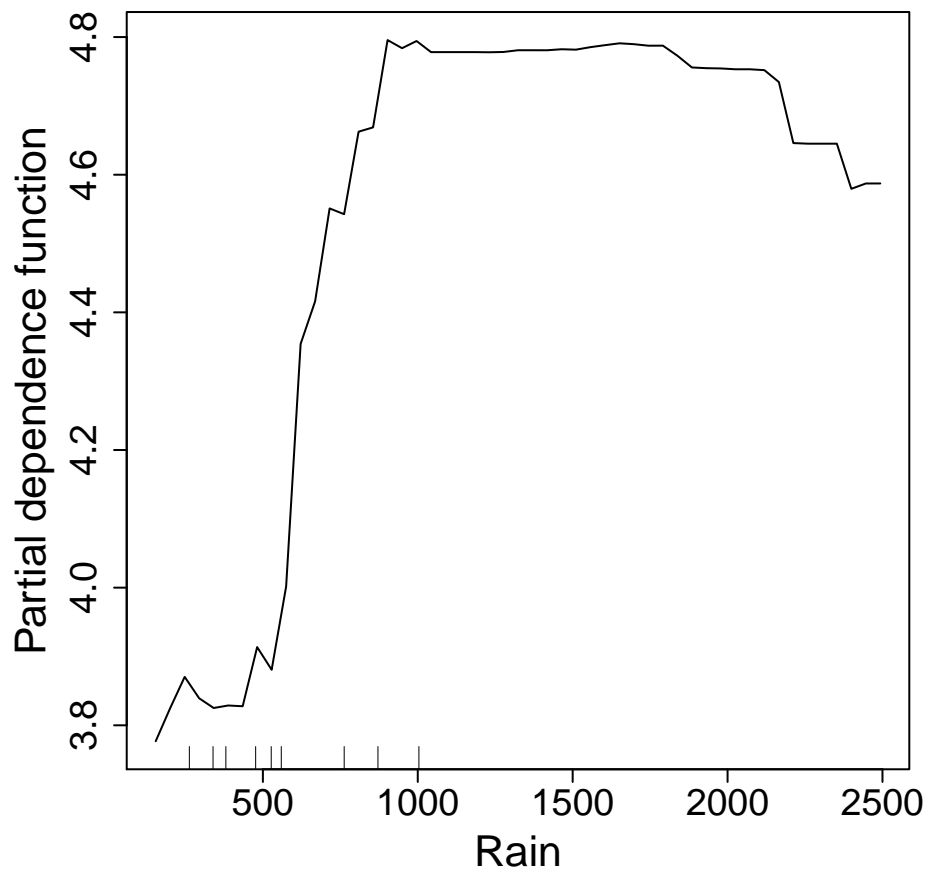

Yield\_RL

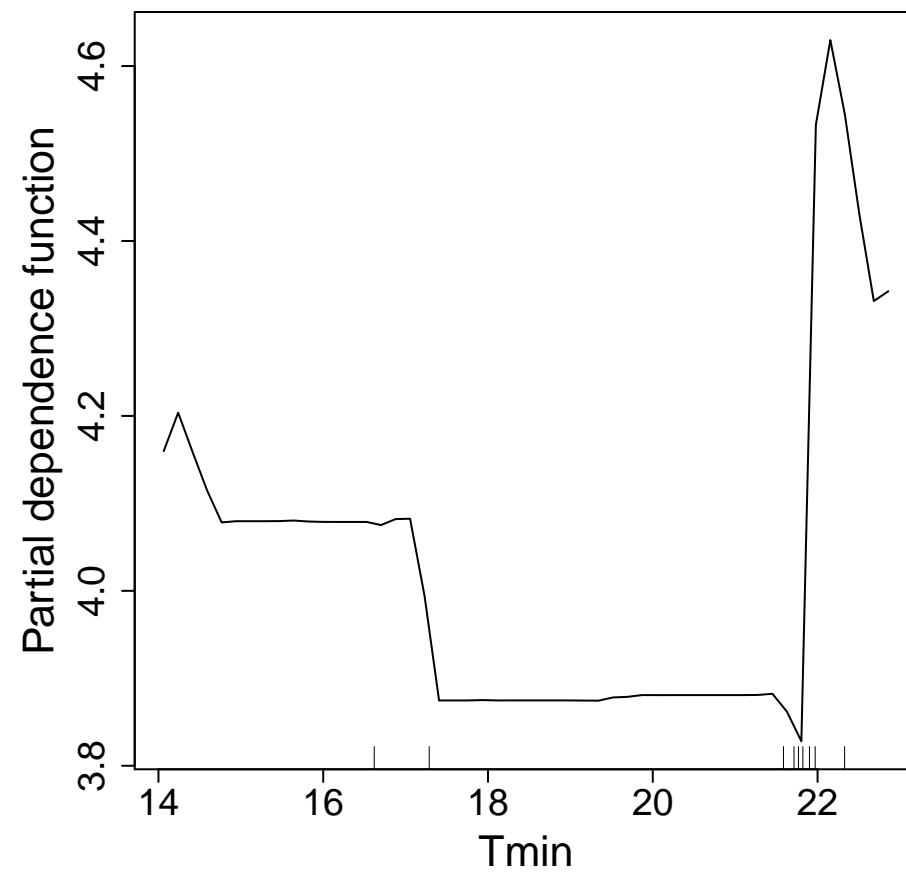

Yield\_RL

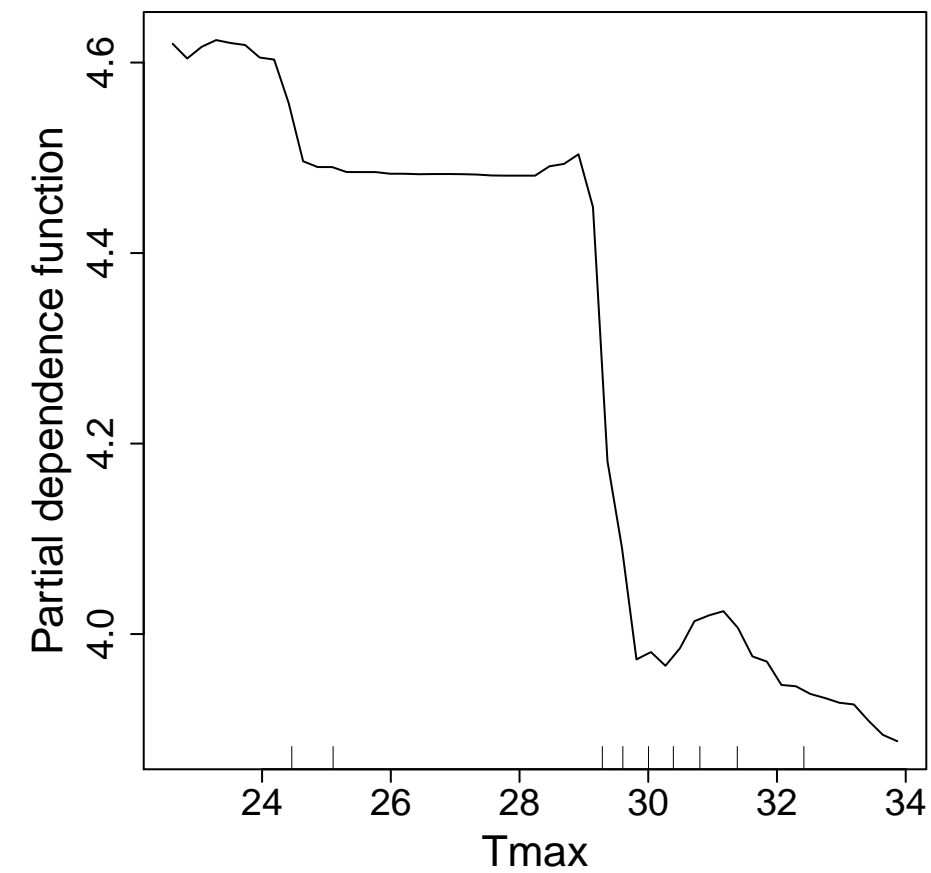

Yield\_RL

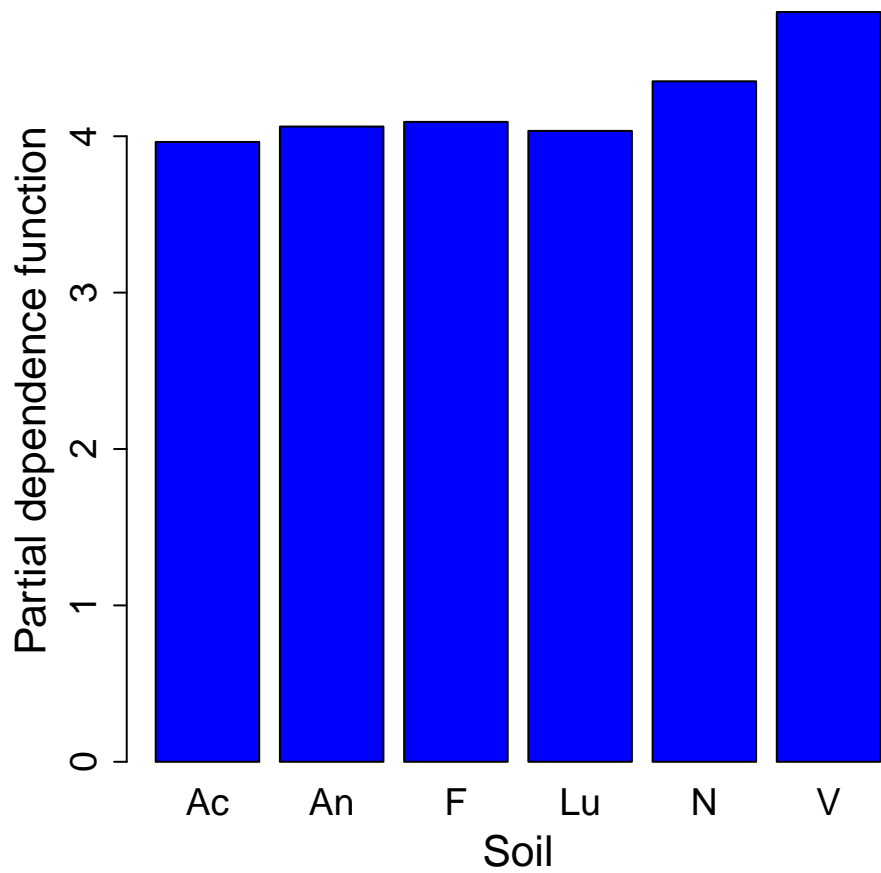

Yield\_RL

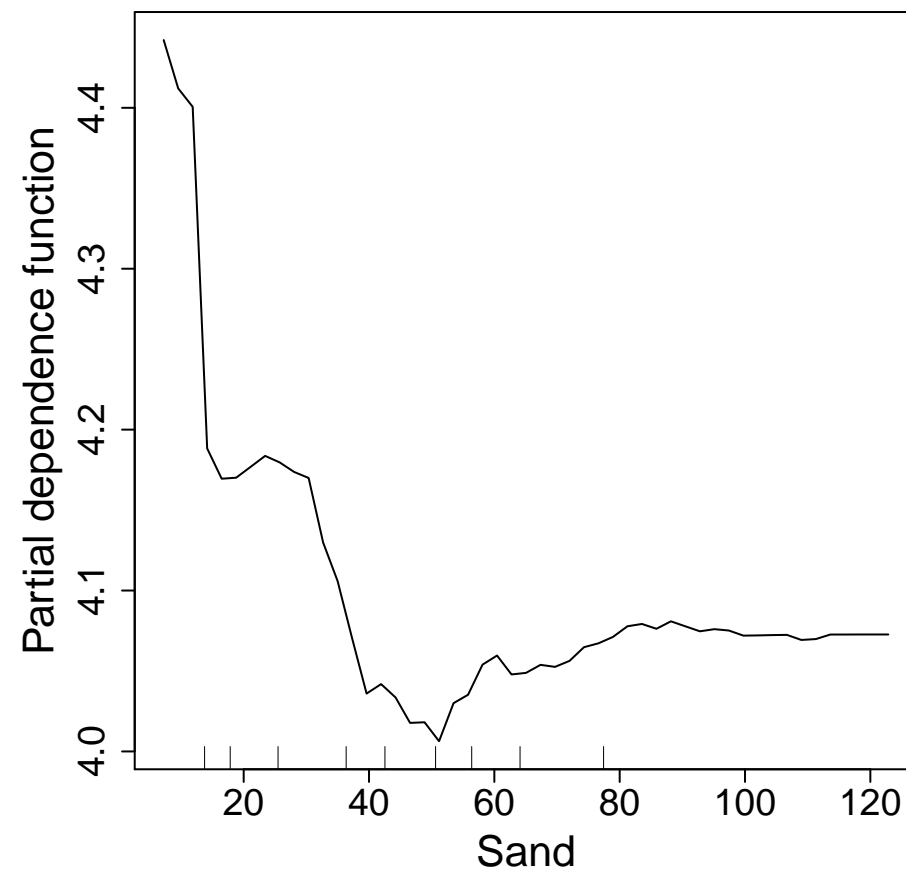

**Yield\_RU**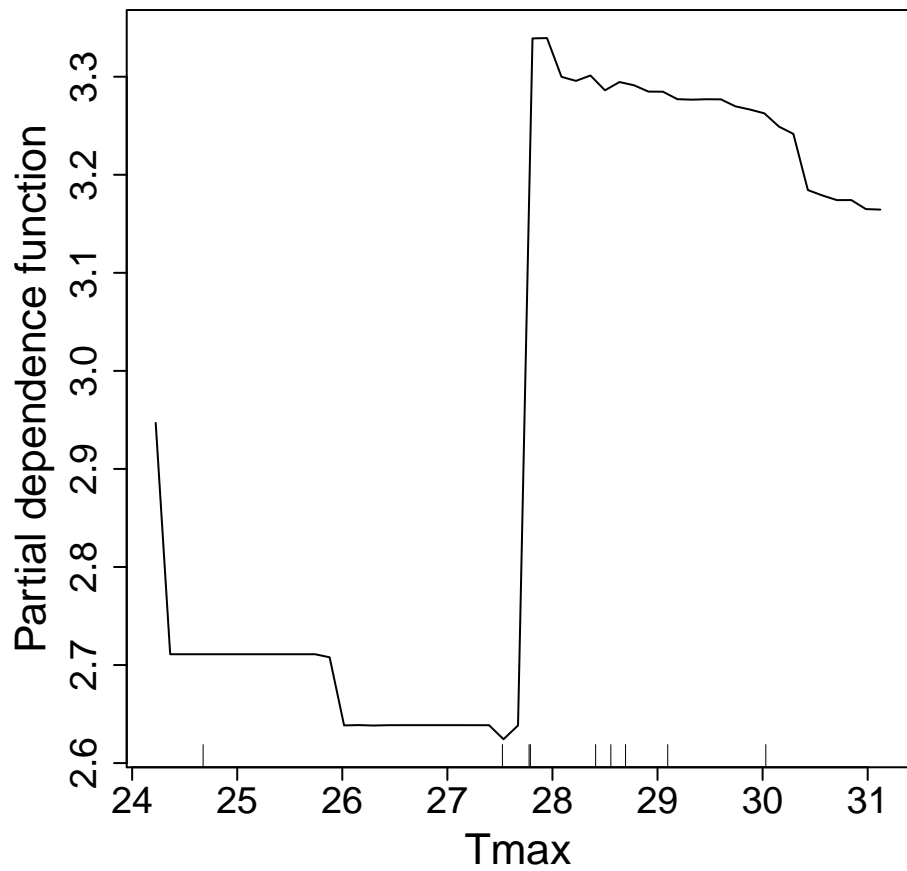**Yield\_RU**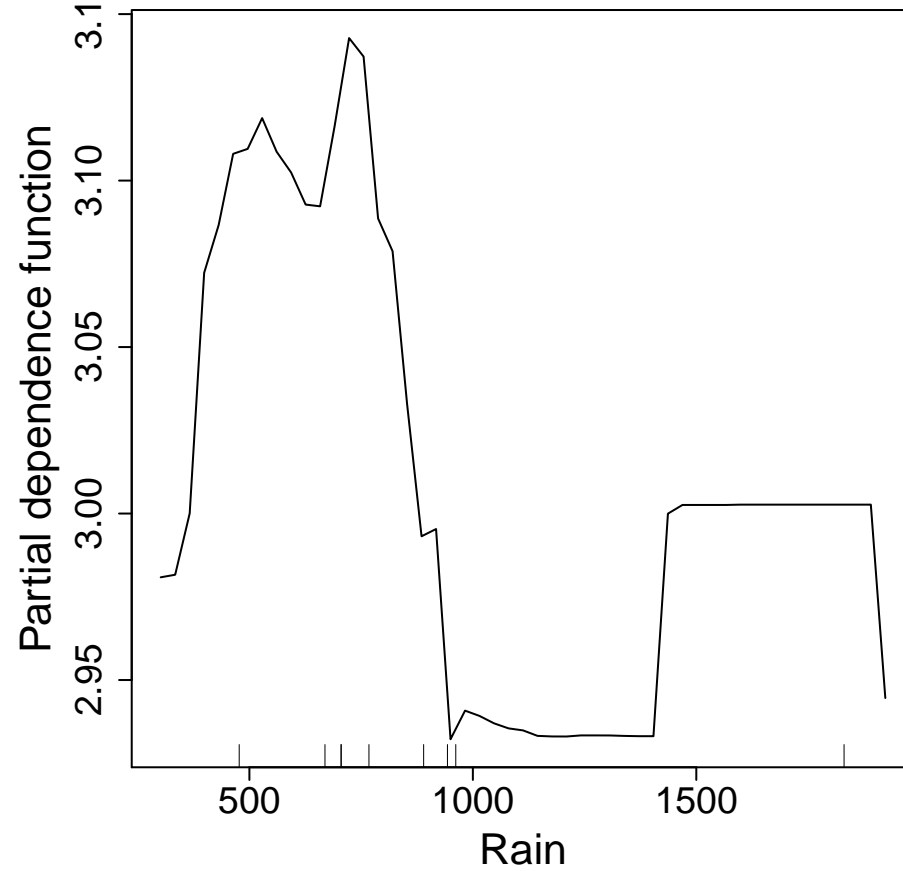**Yield\_RU**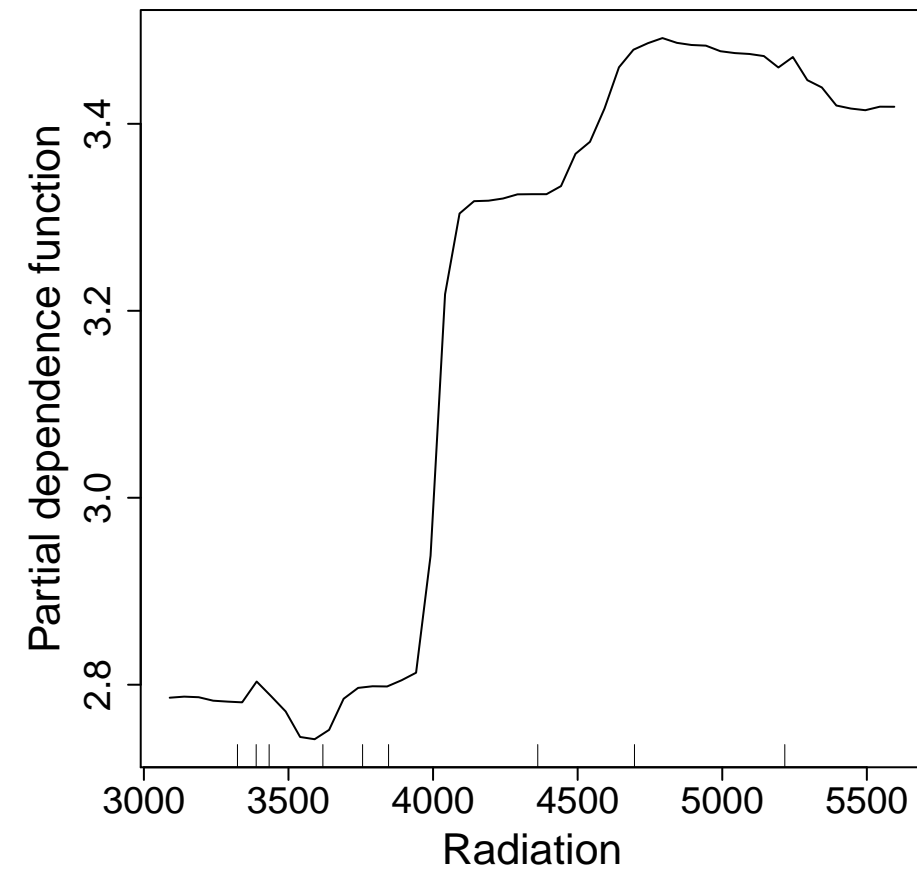**Yield\_RU**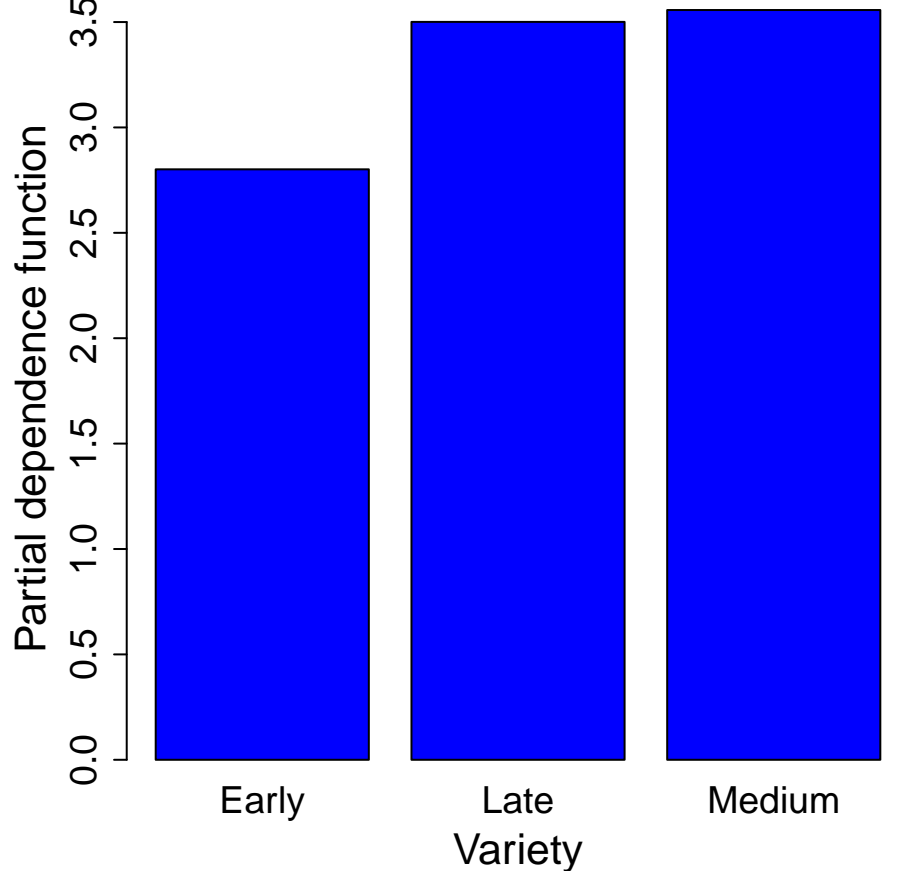**Yield\_RU**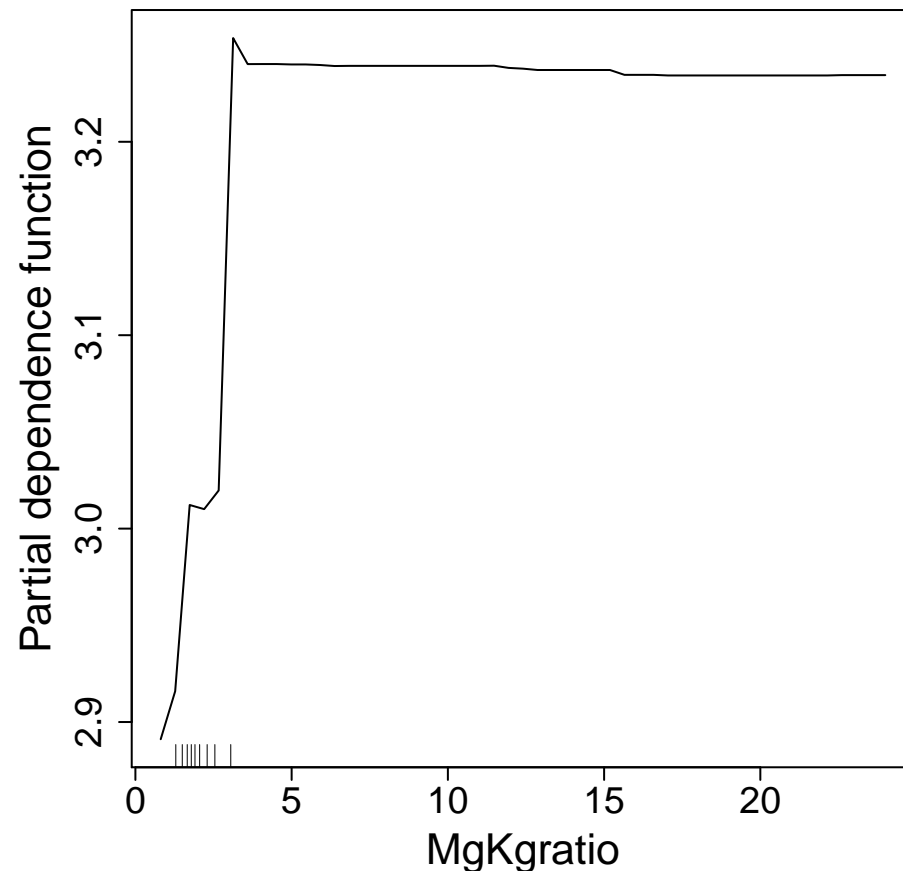

YRN\_IL

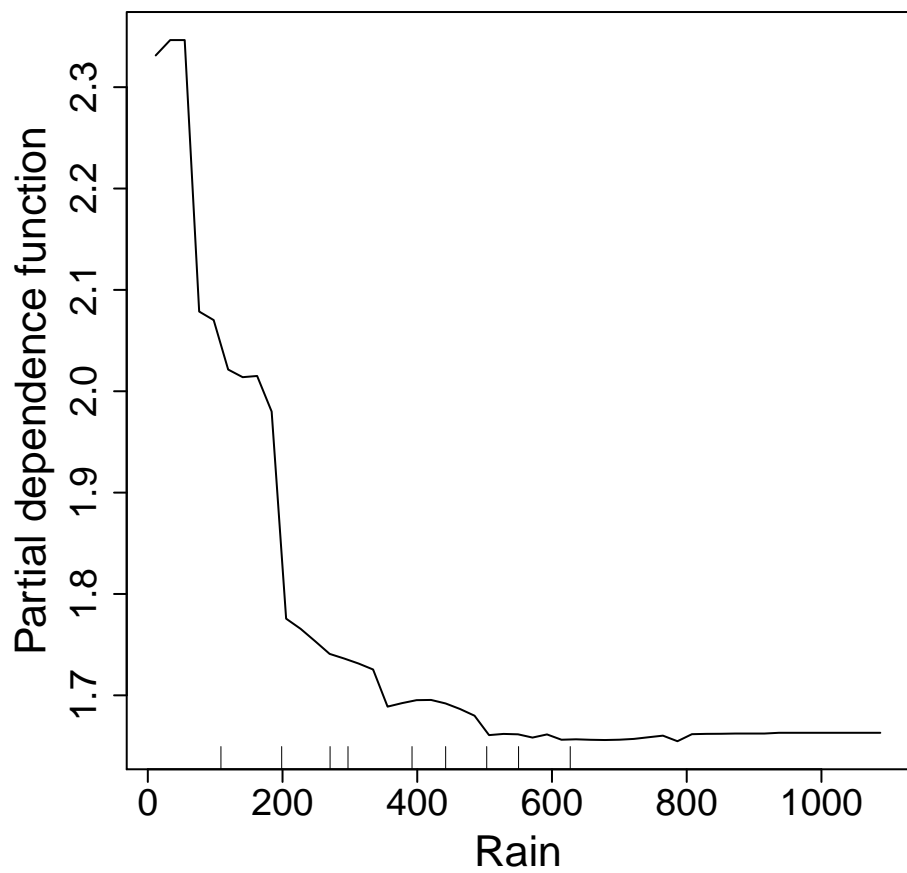

YRN\_IL

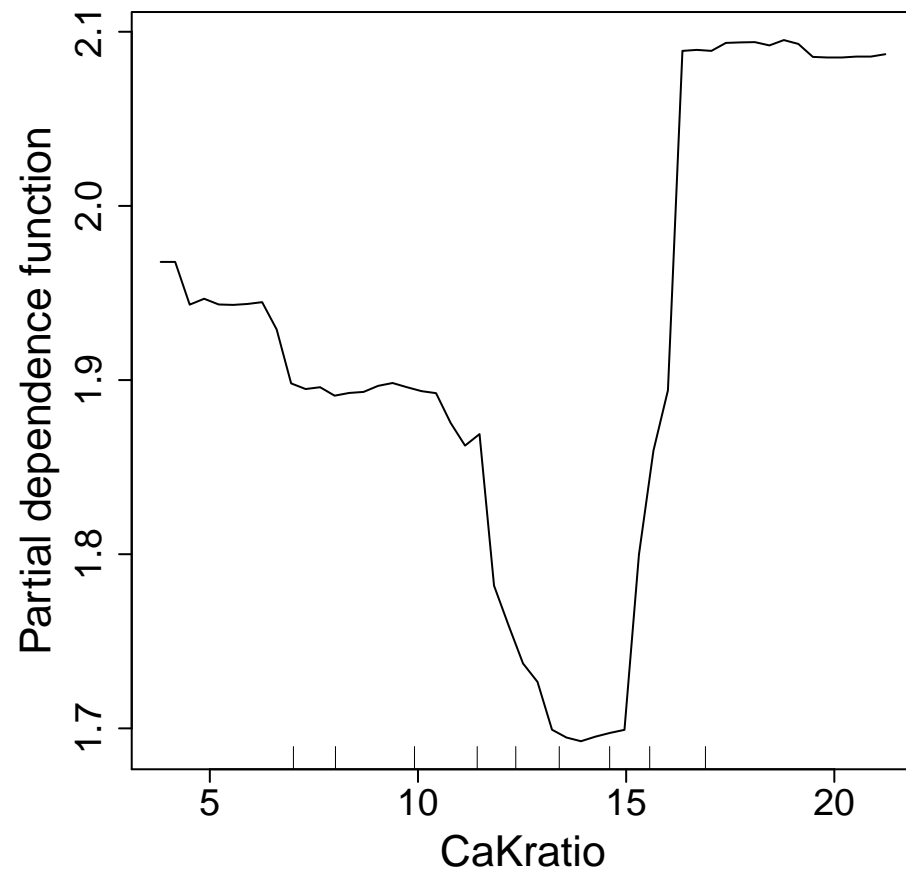

YRN\_IL

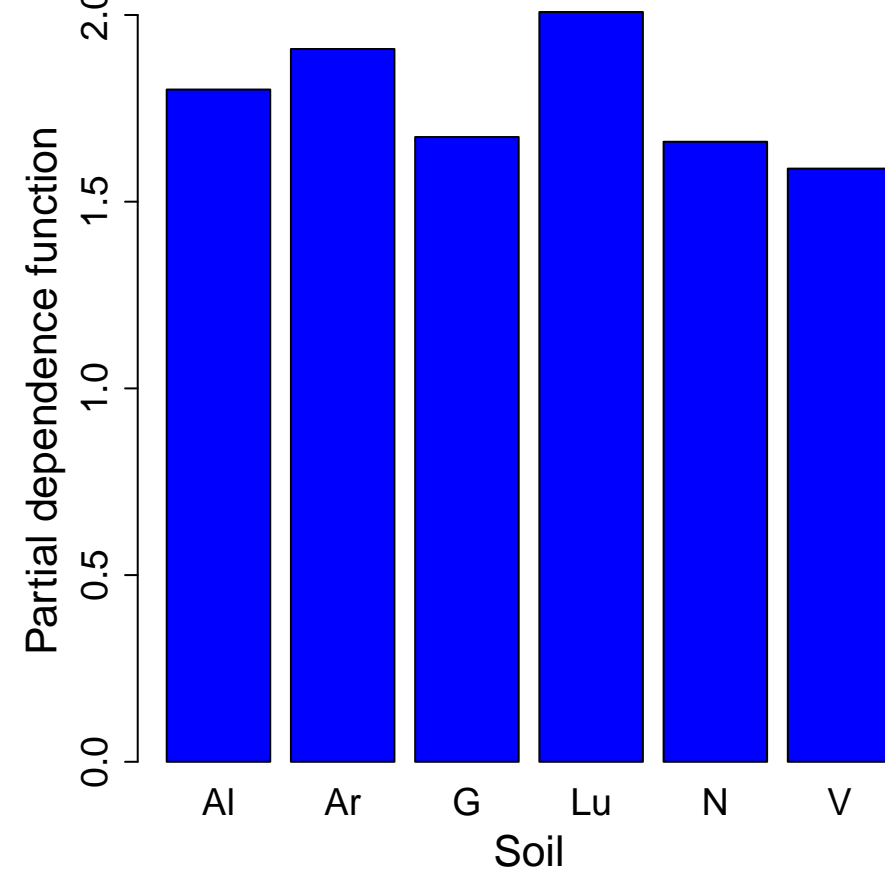

YRN\_IL

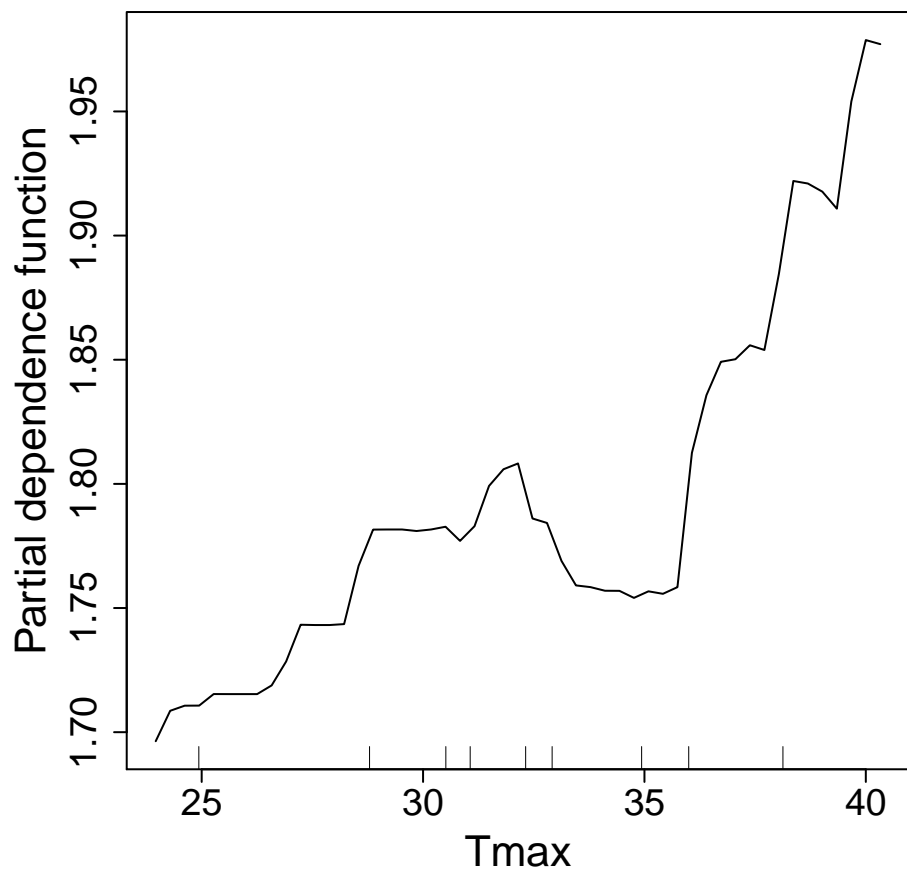

YRN\_IL

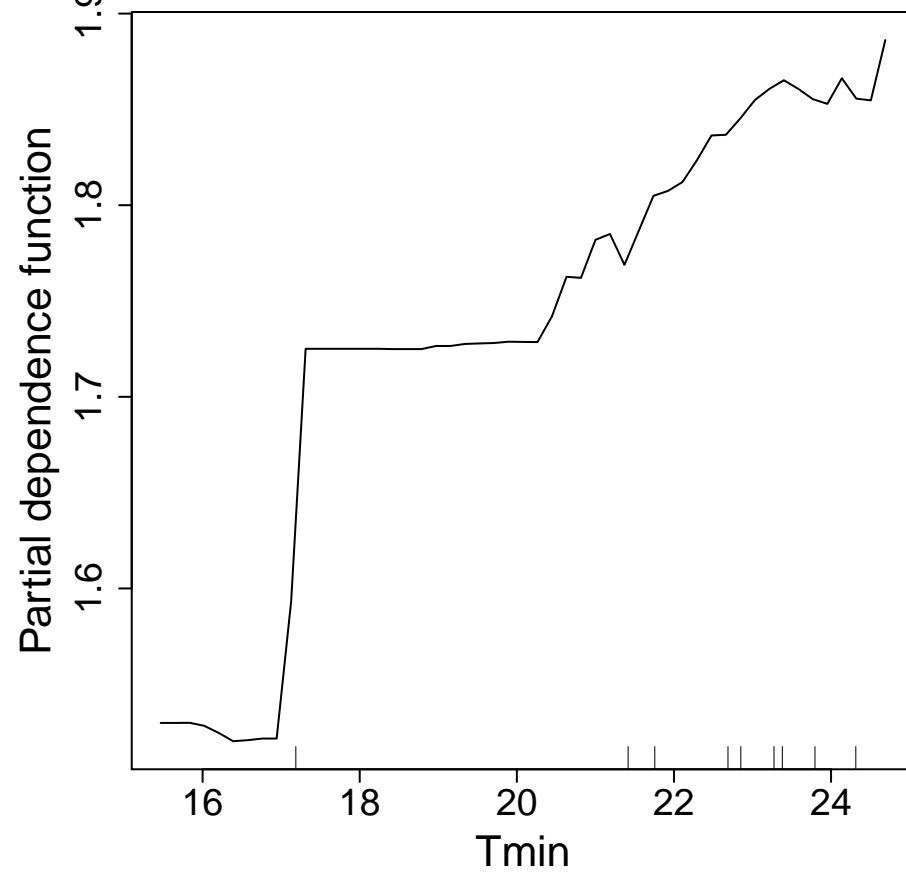

**YRN\_RL**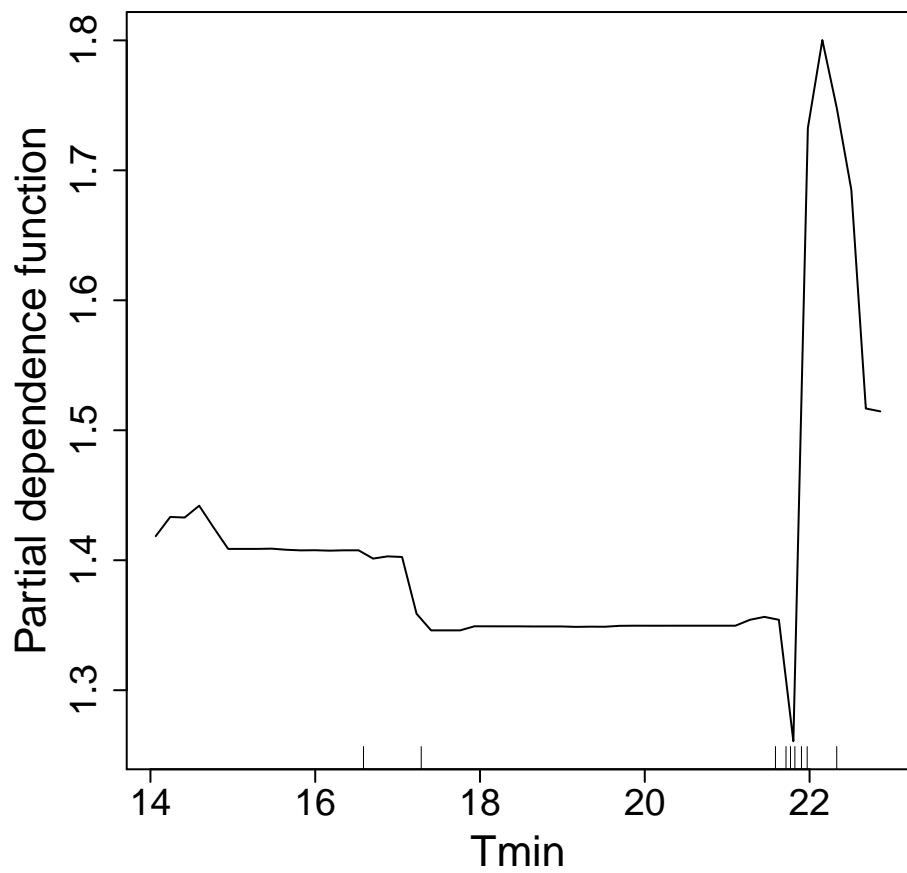**YRN\_RL**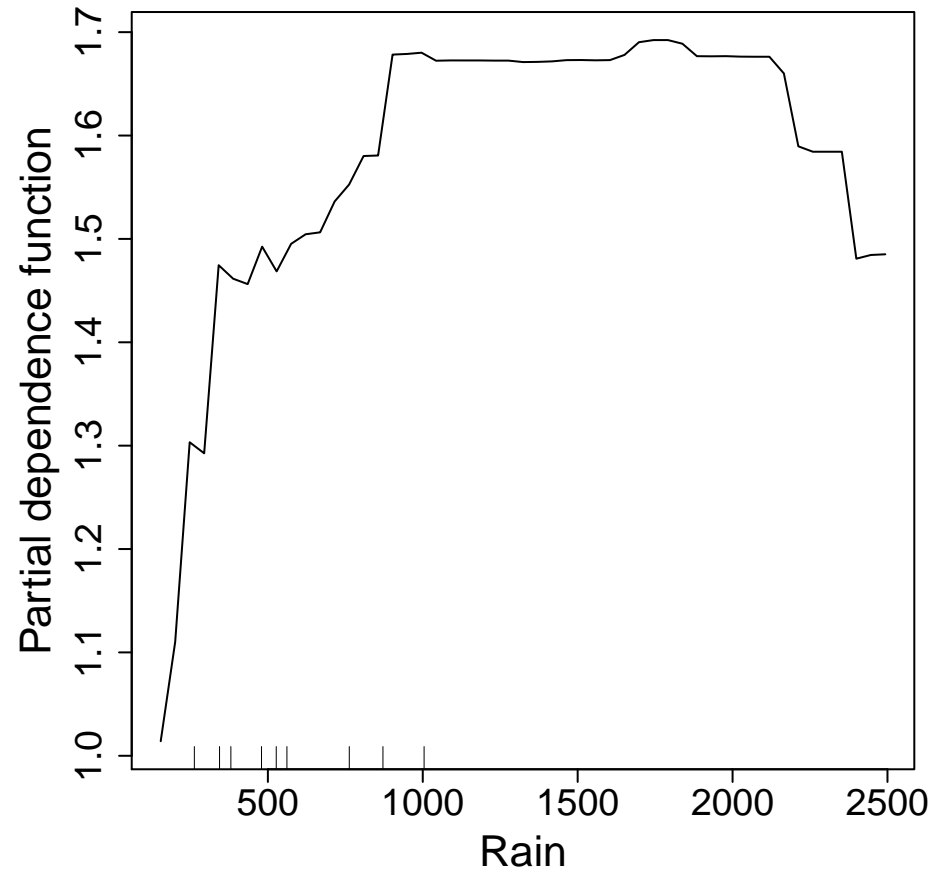**YRN\_RL**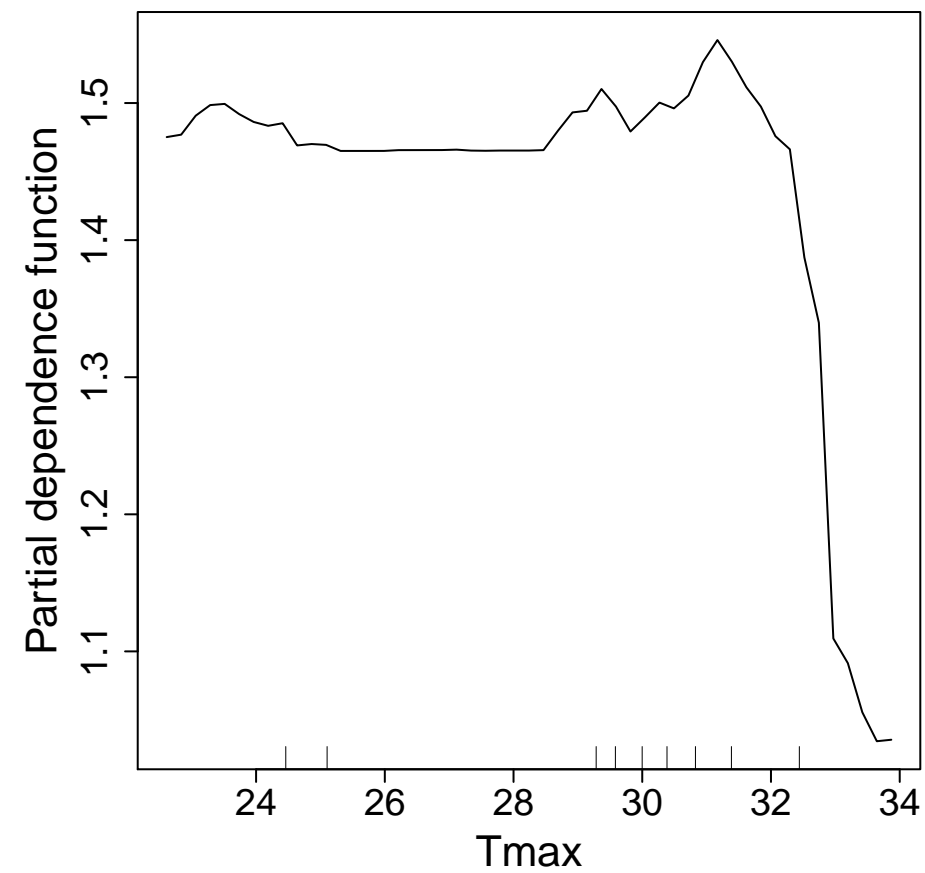**YRN\_RL**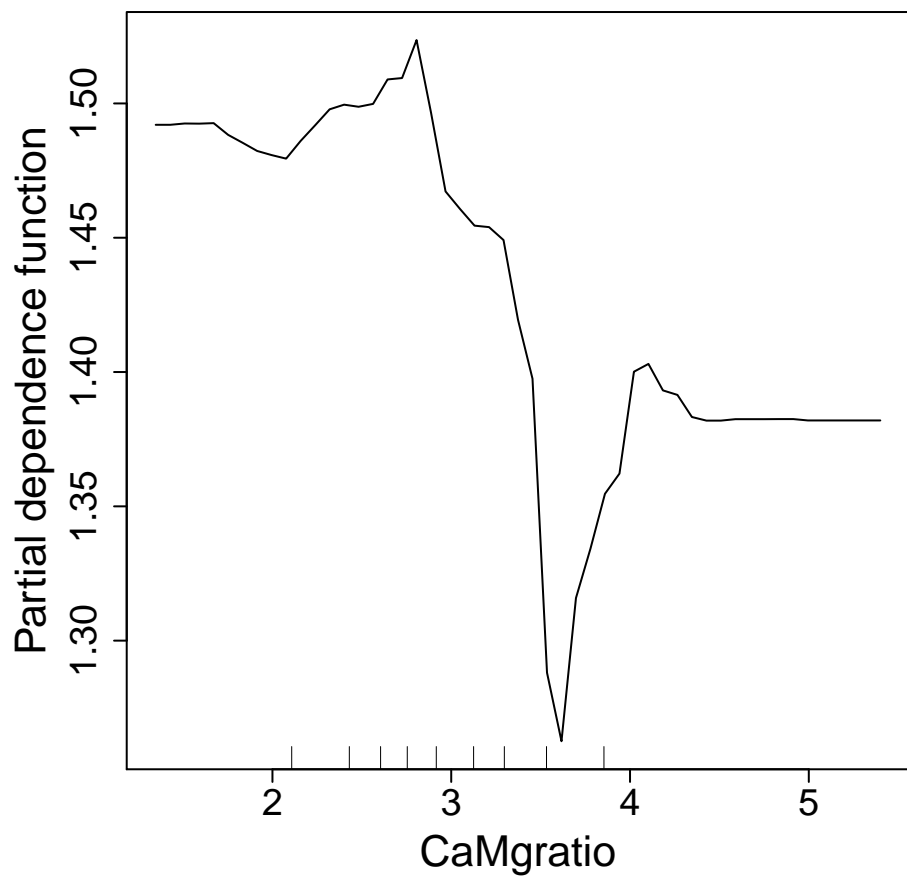**YRN\_RL**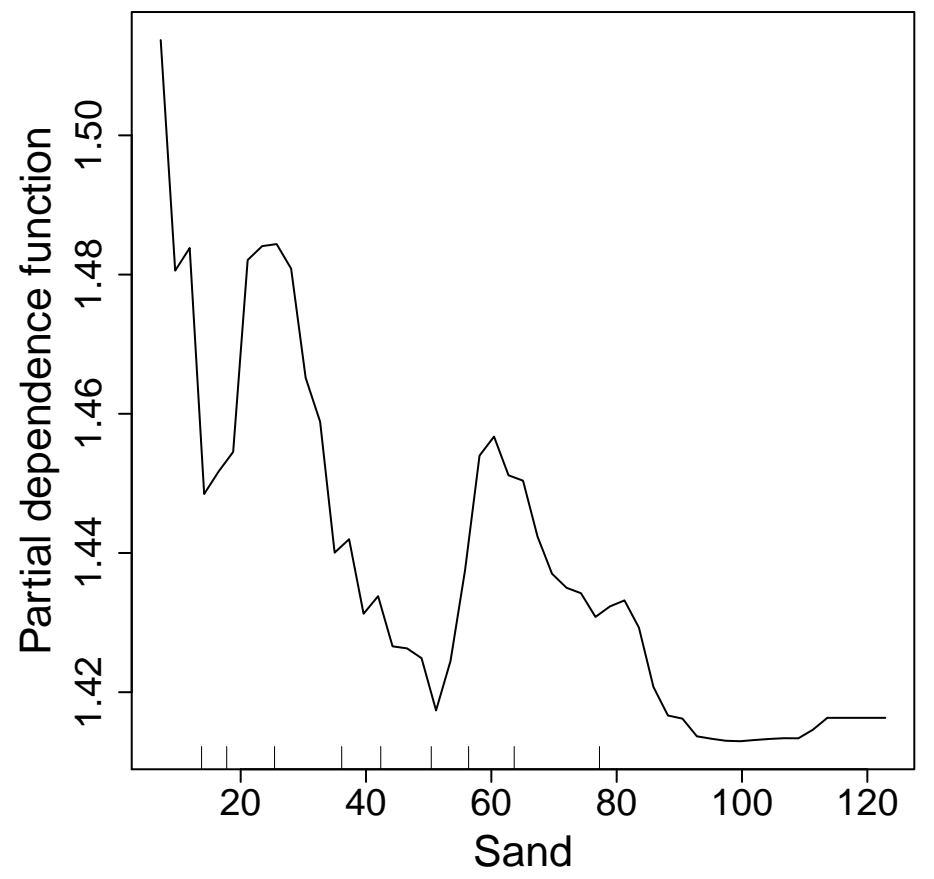

**YRN\_RU**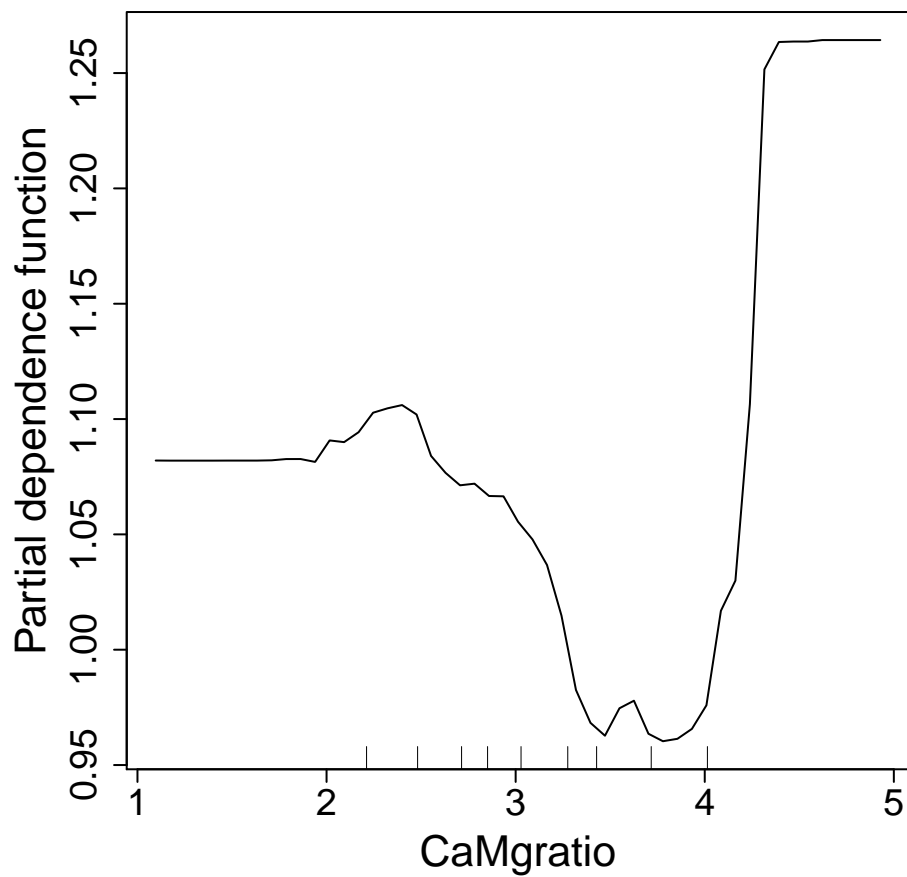**YRN\_RU**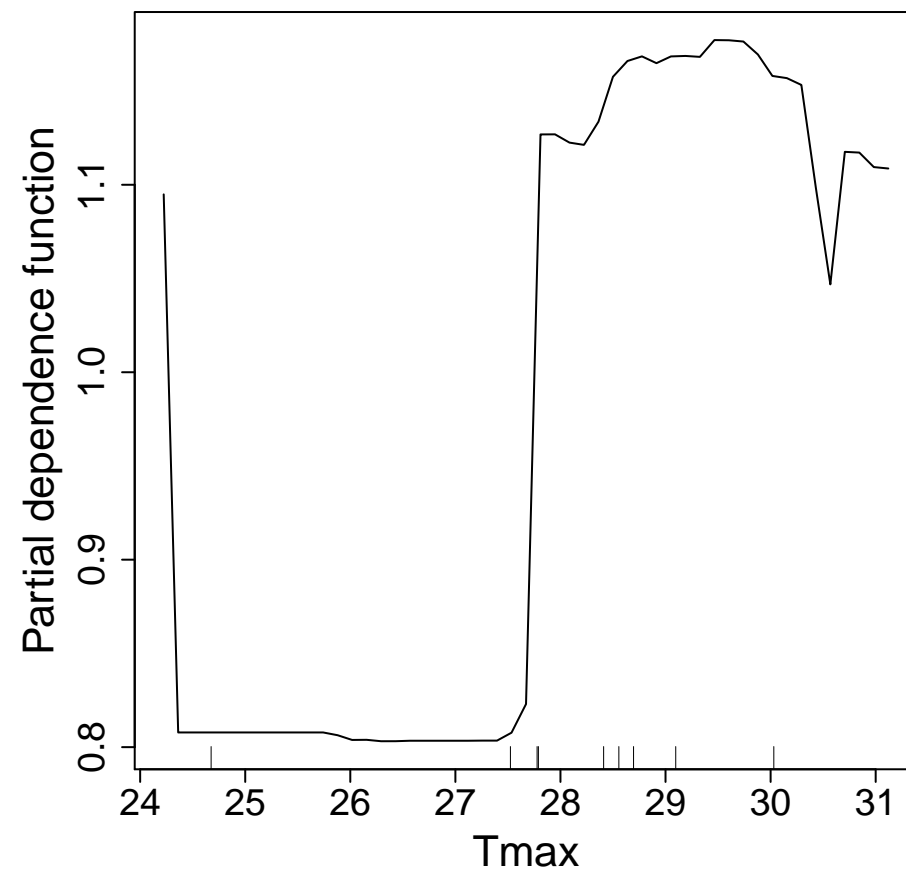**YRN\_RU**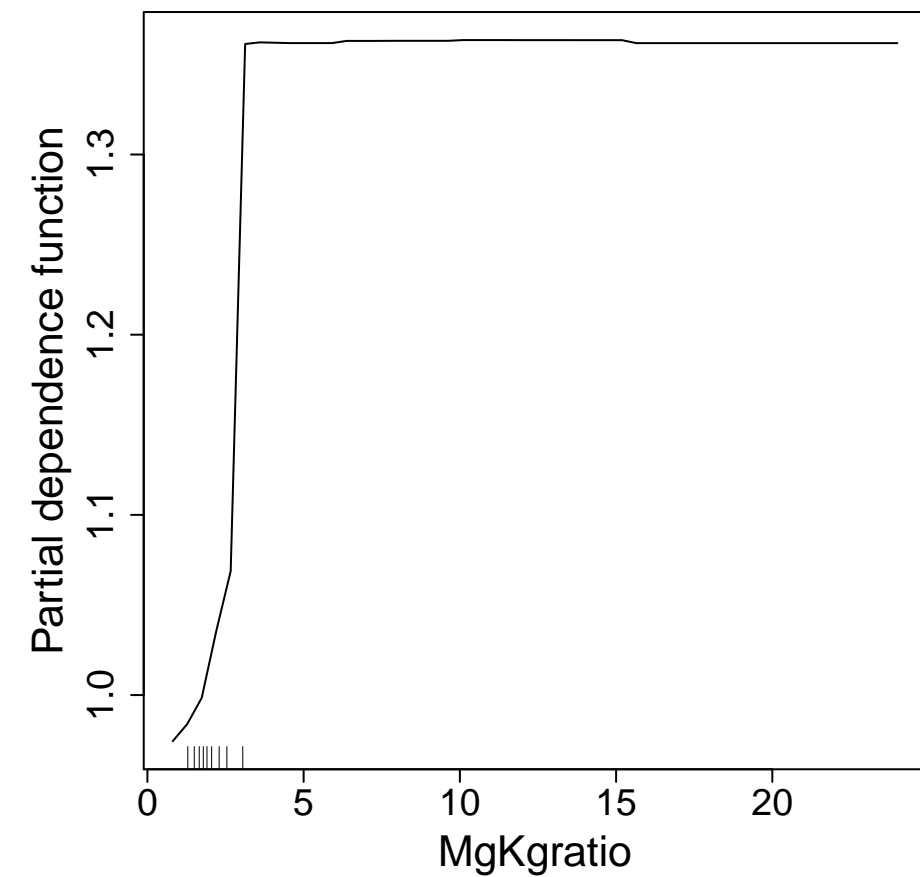**YRN\_RU**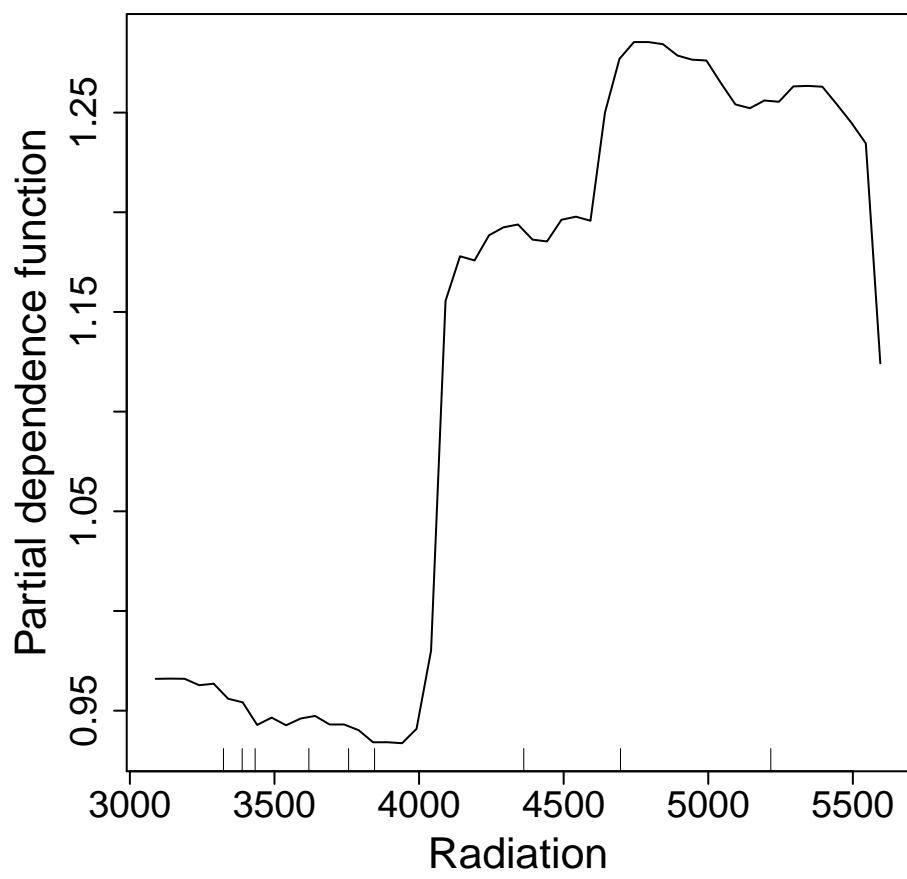**YRN\_RU**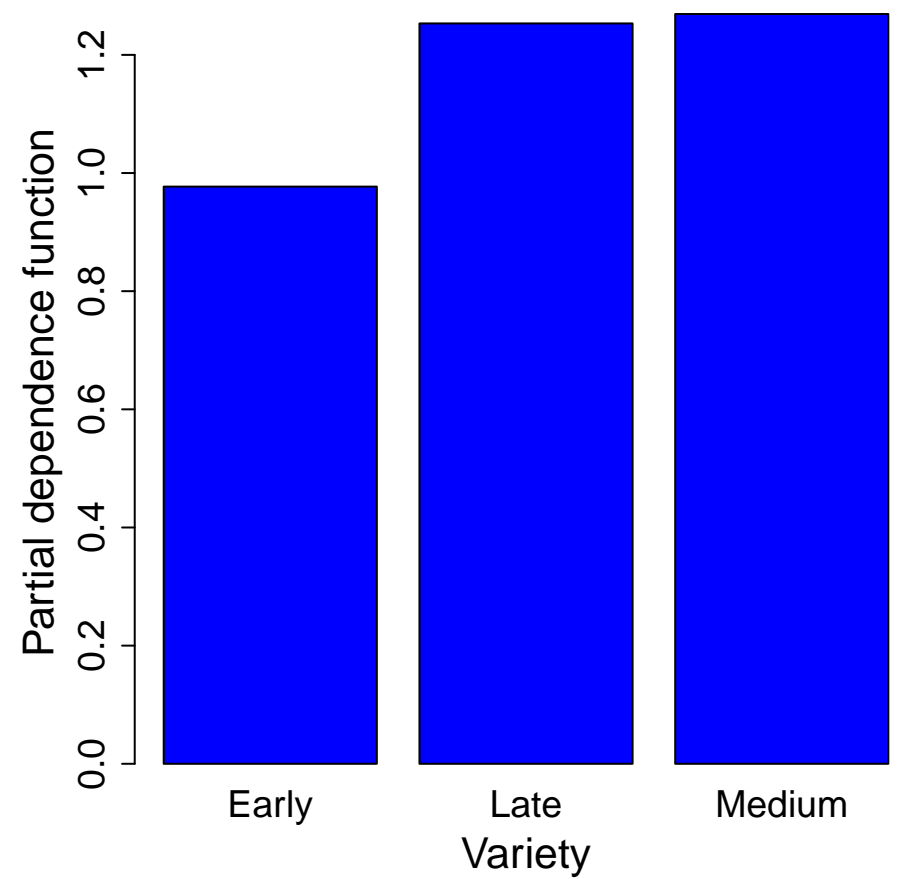

YRP\_IL

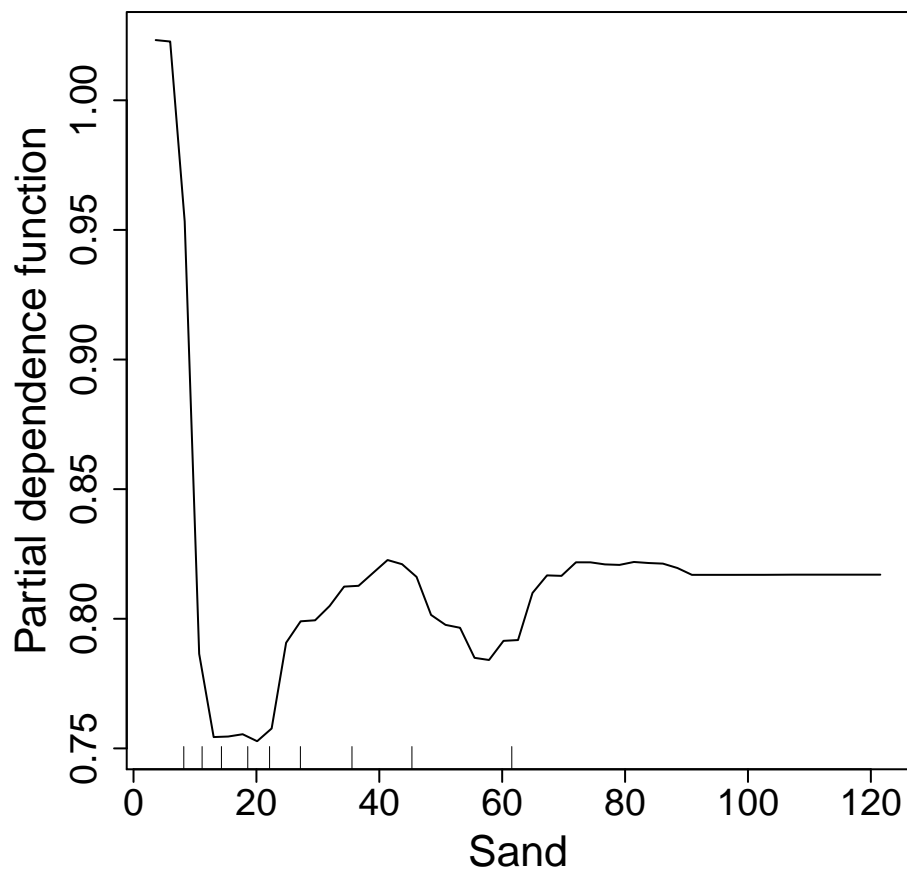

YRP\_IL

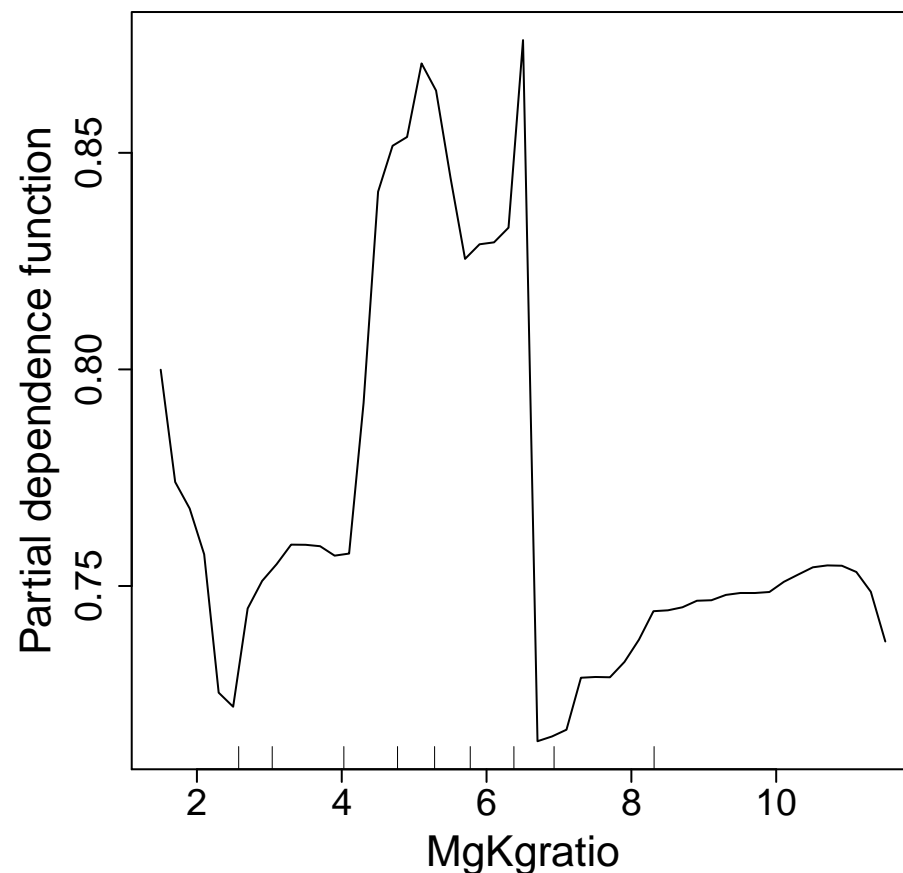

YRP\_IL

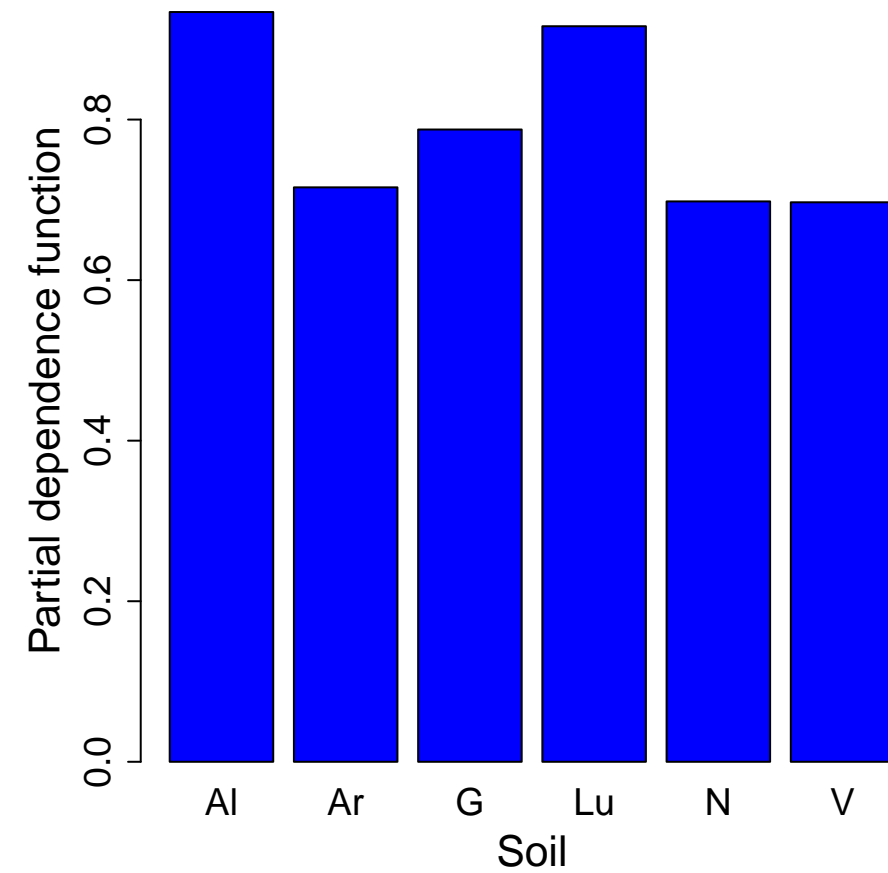

YRP\_IL

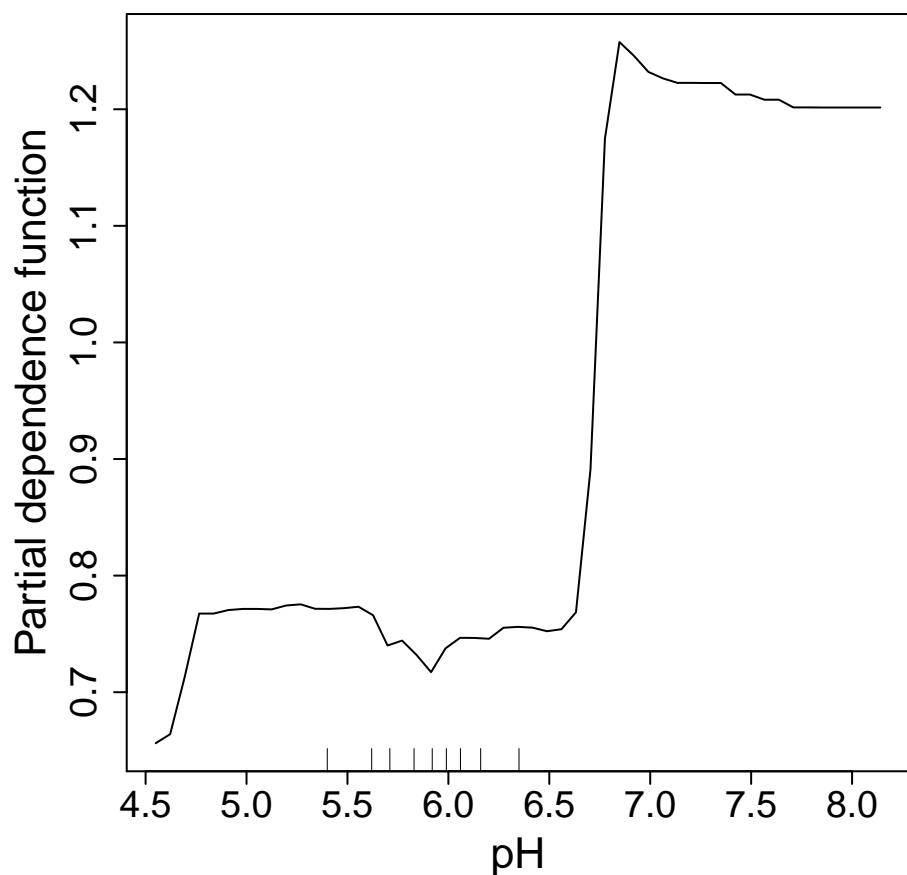

YRP\_IL

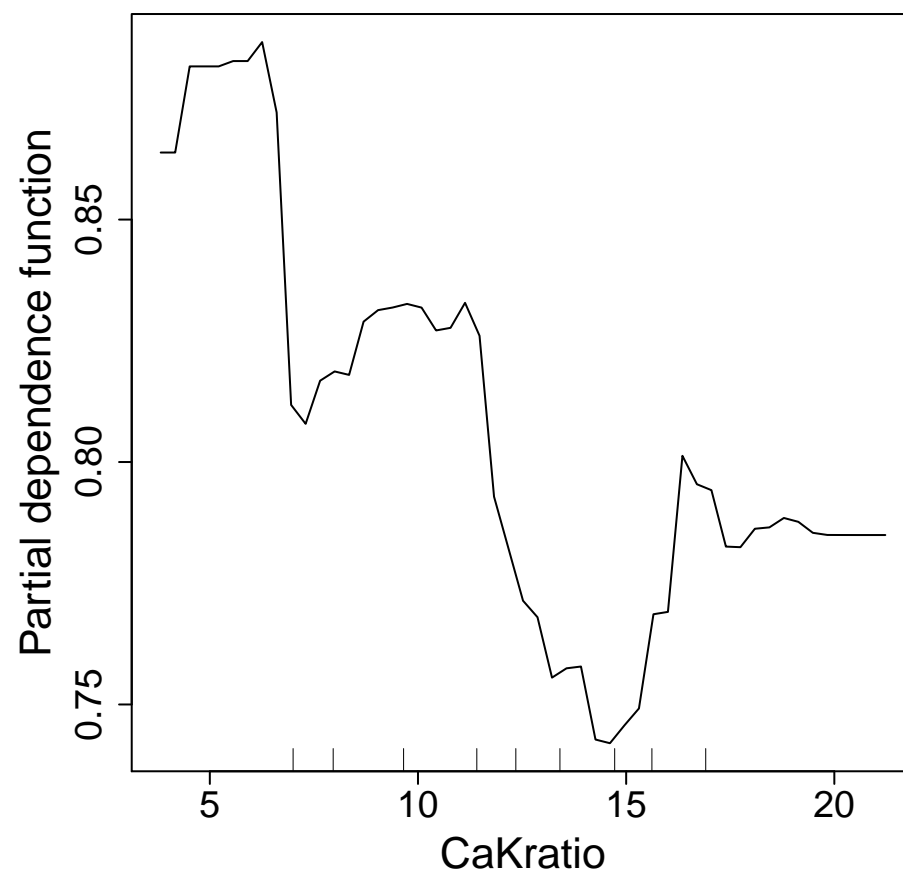

YRP\_RL

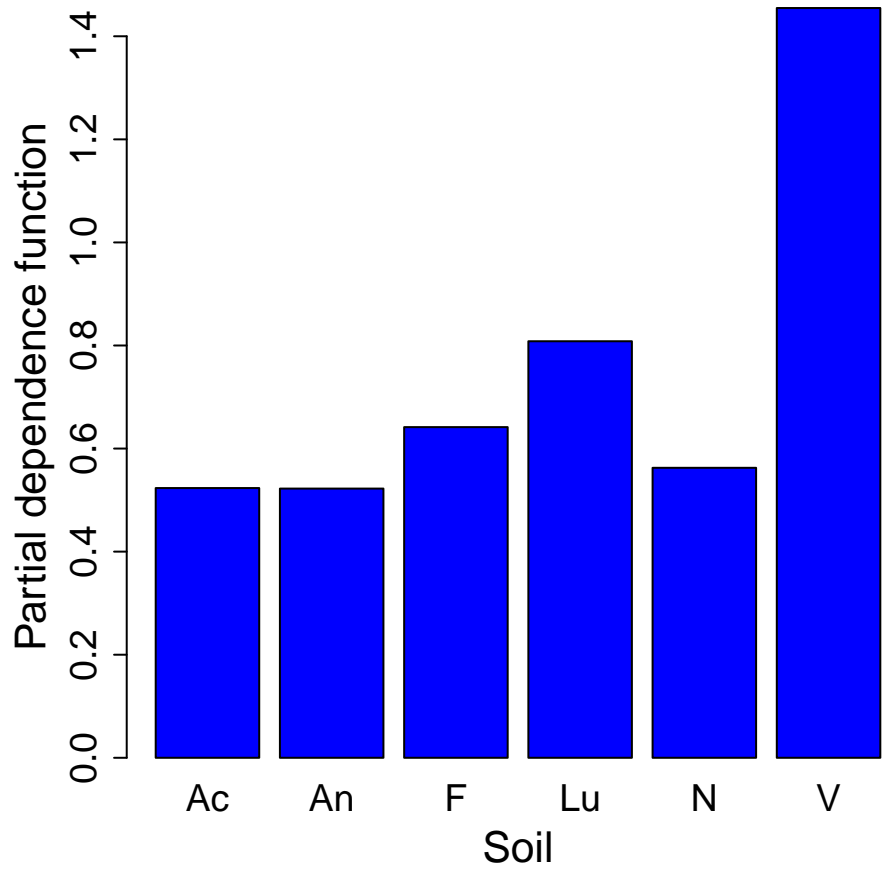

YRP\_RL

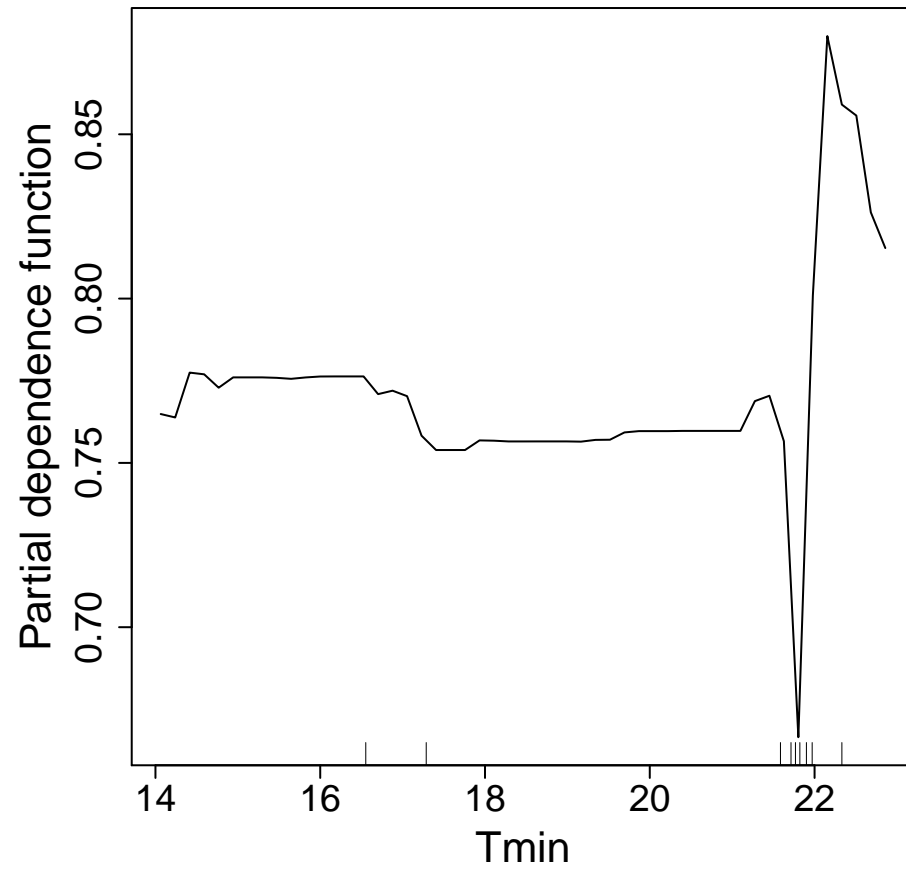

YRP\_RL

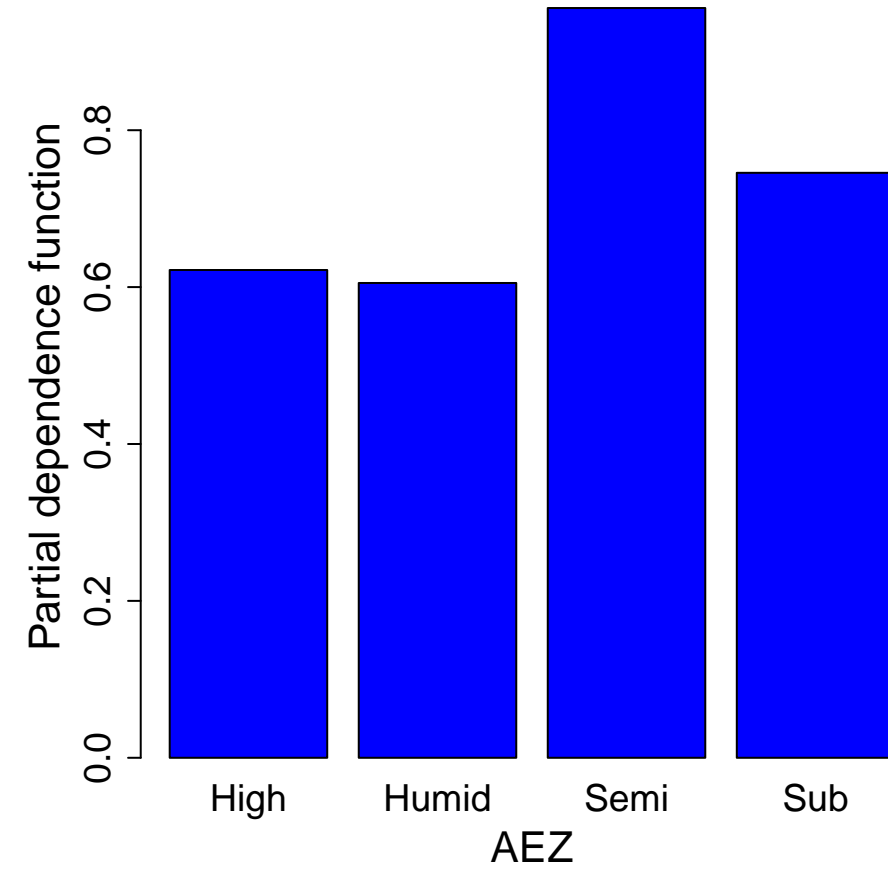

YRP\_RL

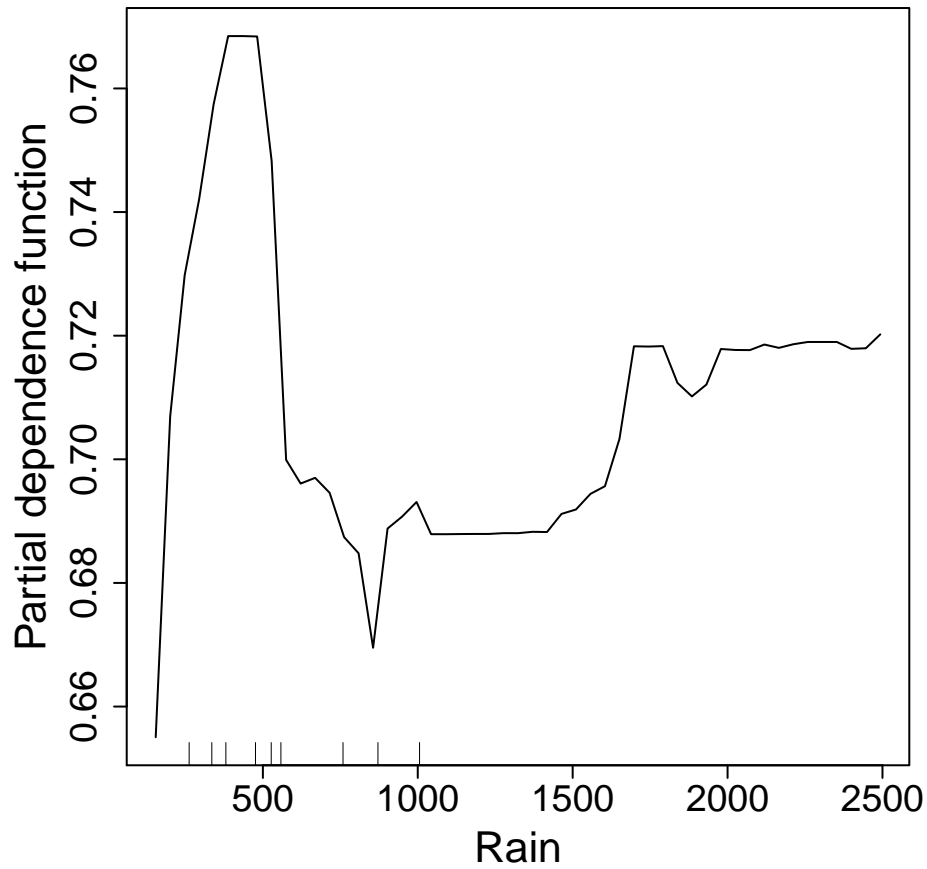

YRP\_RL

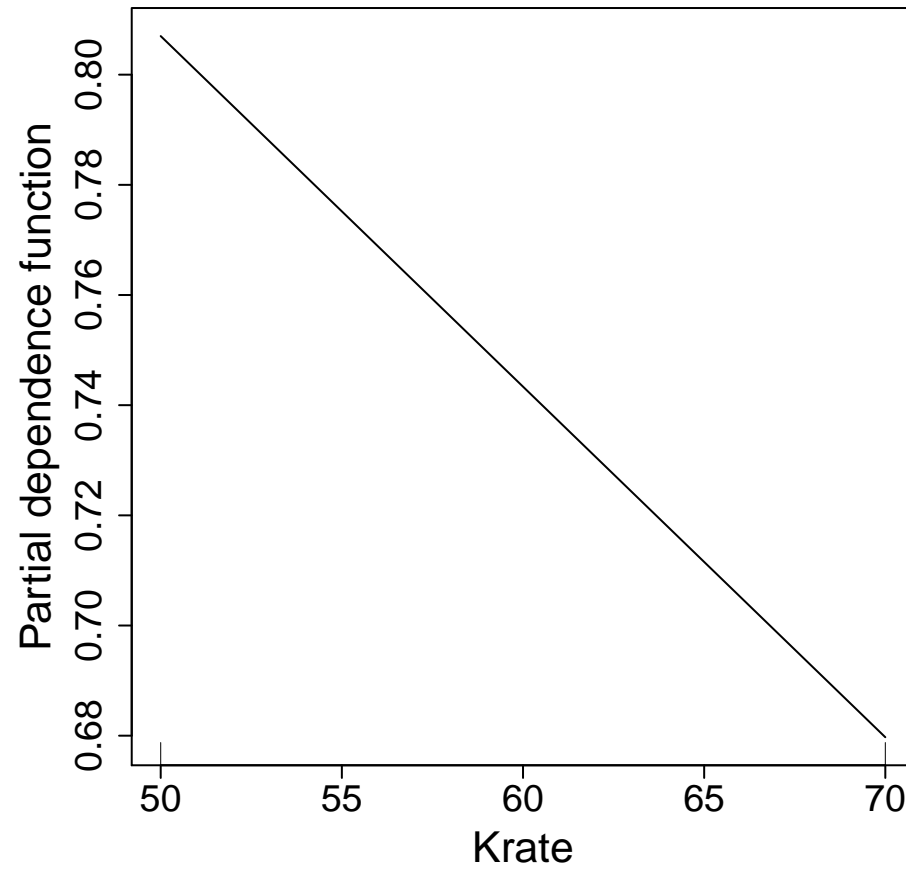



**YRP\_RU**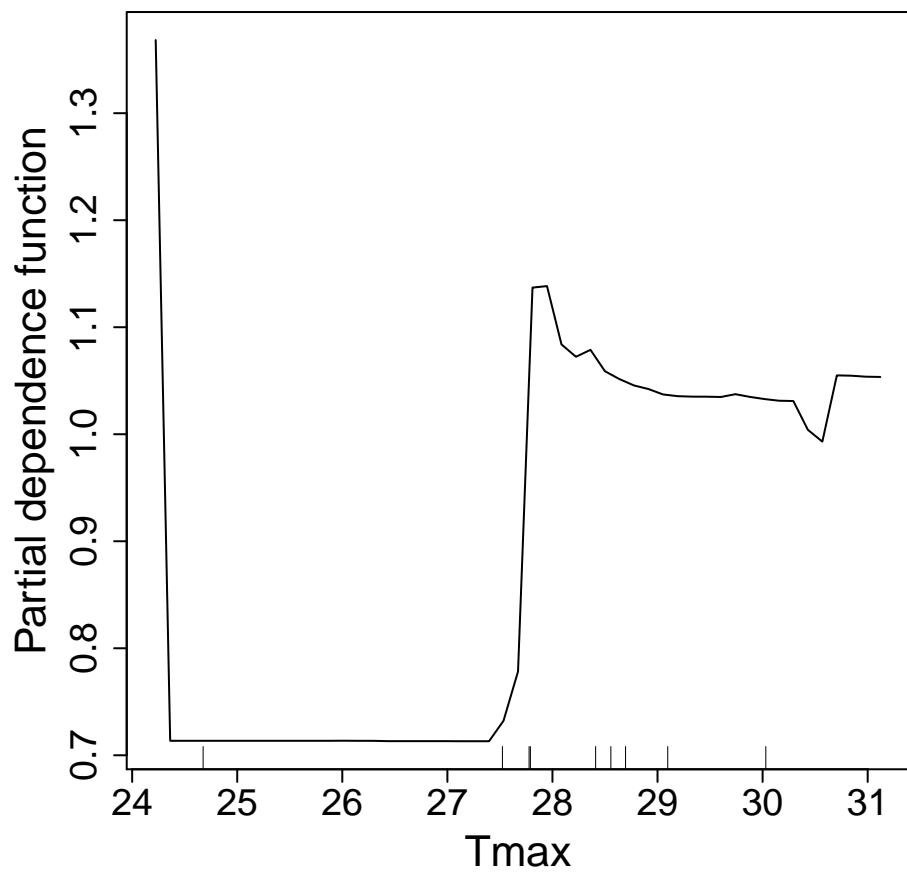**YRP\_RU**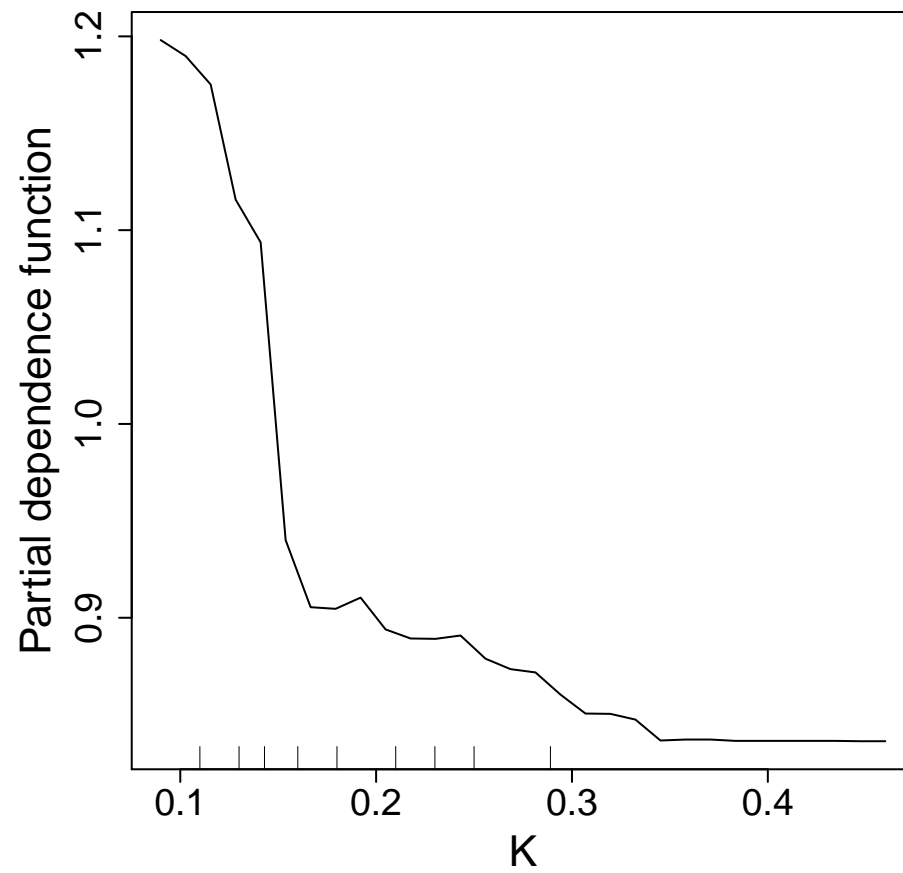**YRP\_RU**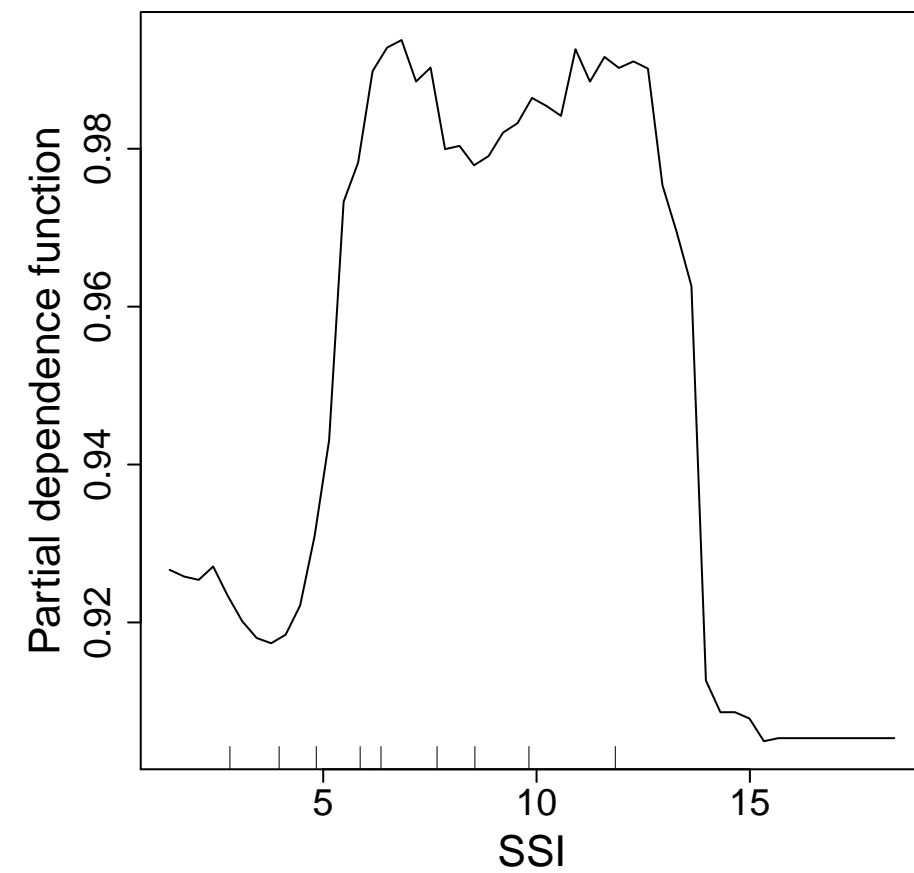**YRP\_RU**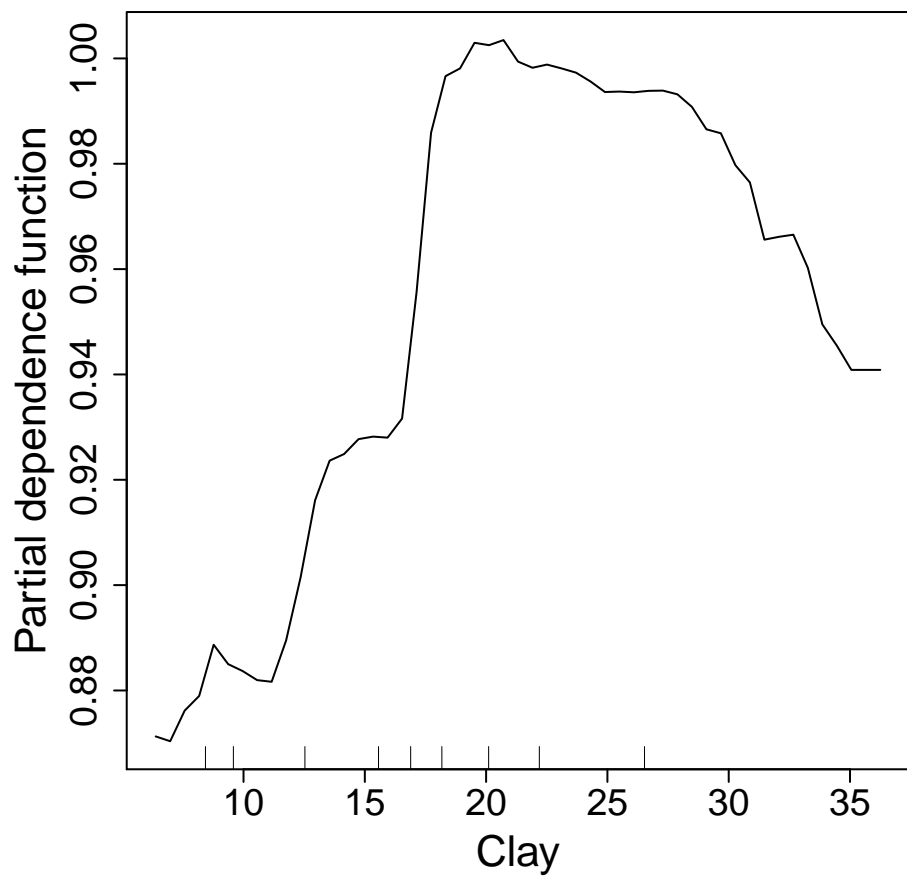**YRP\_RU**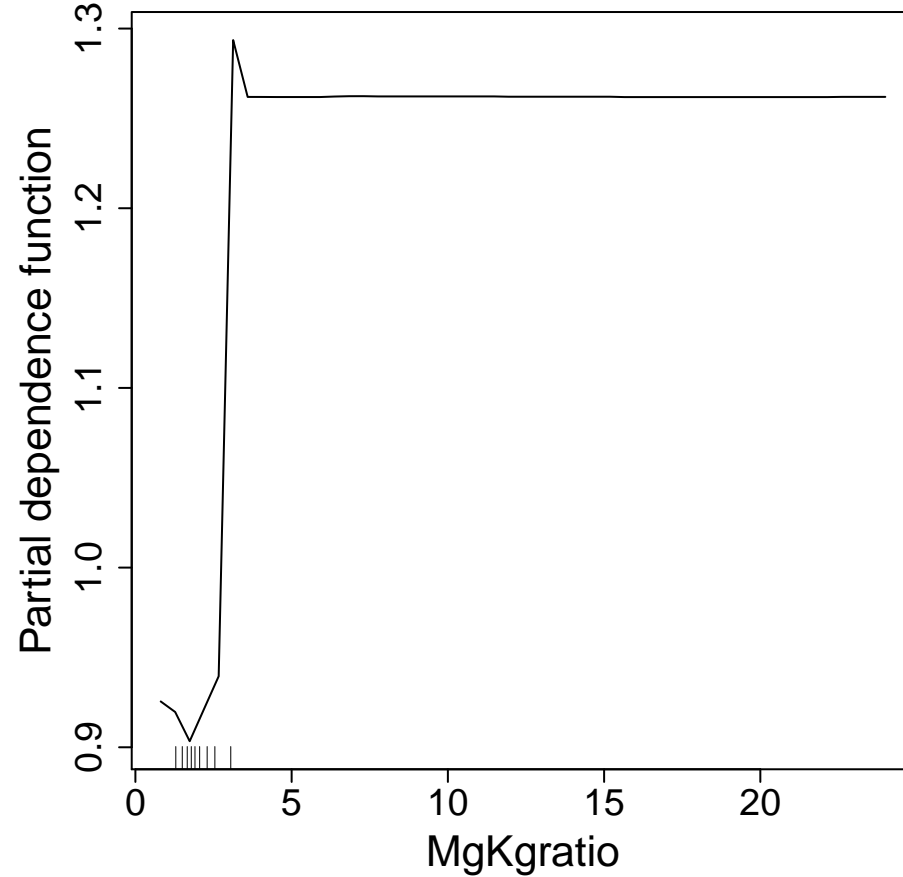

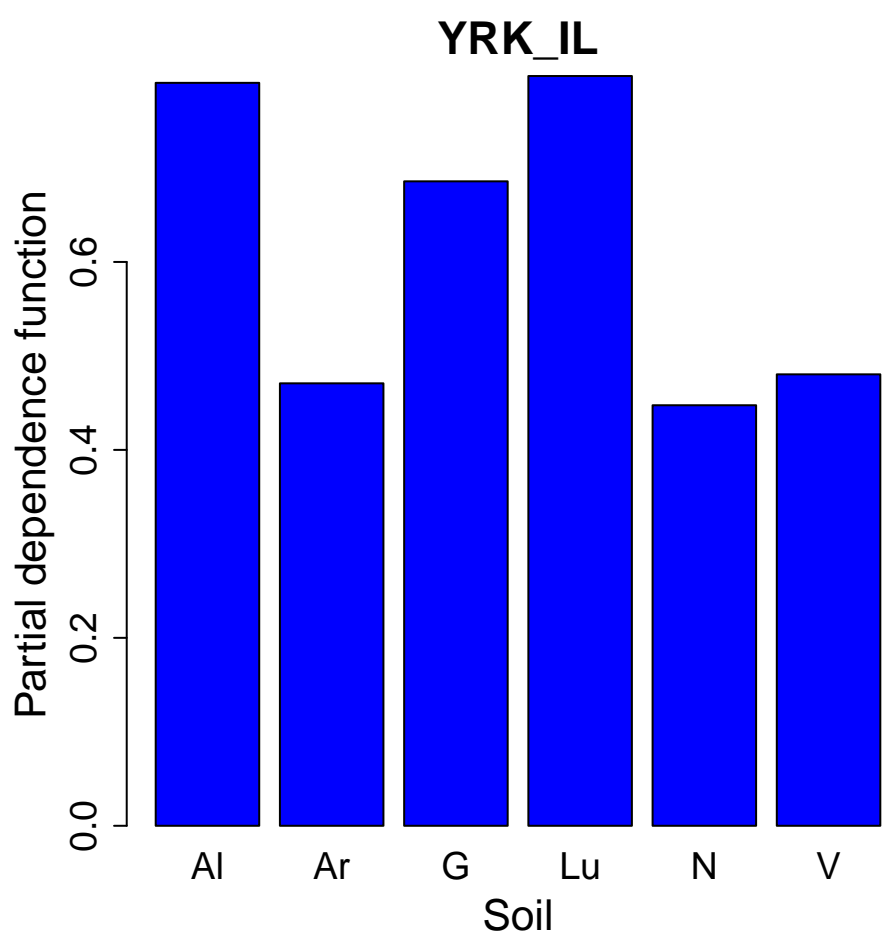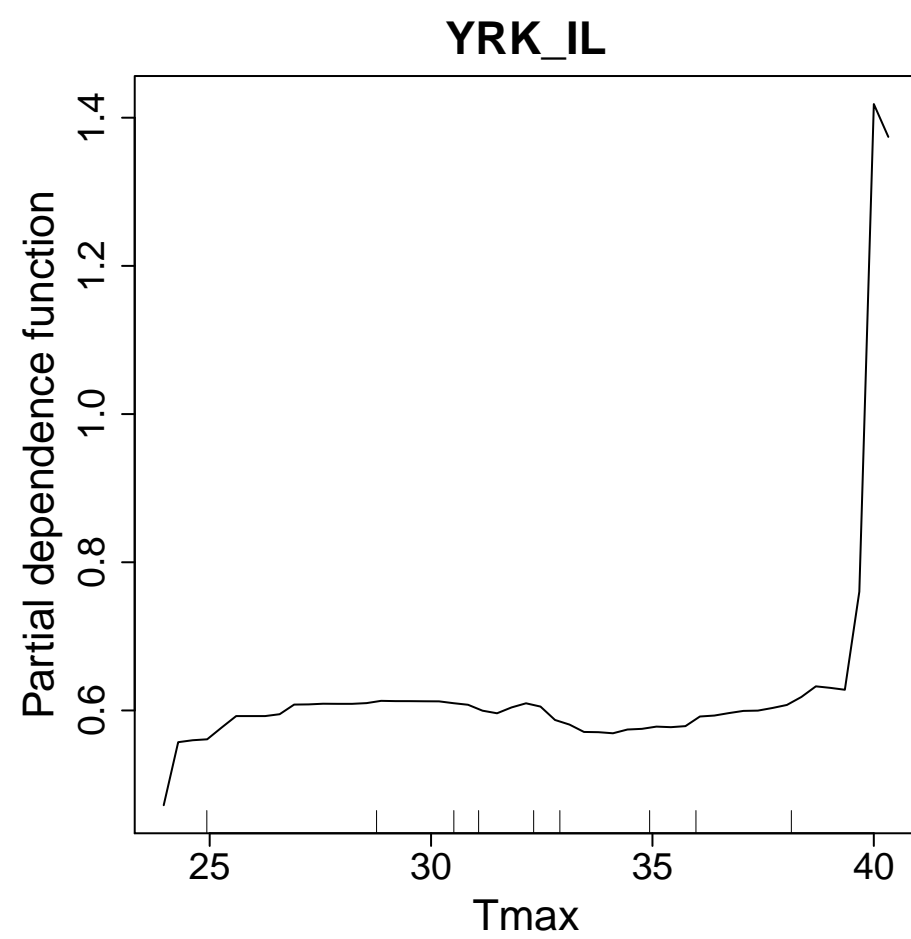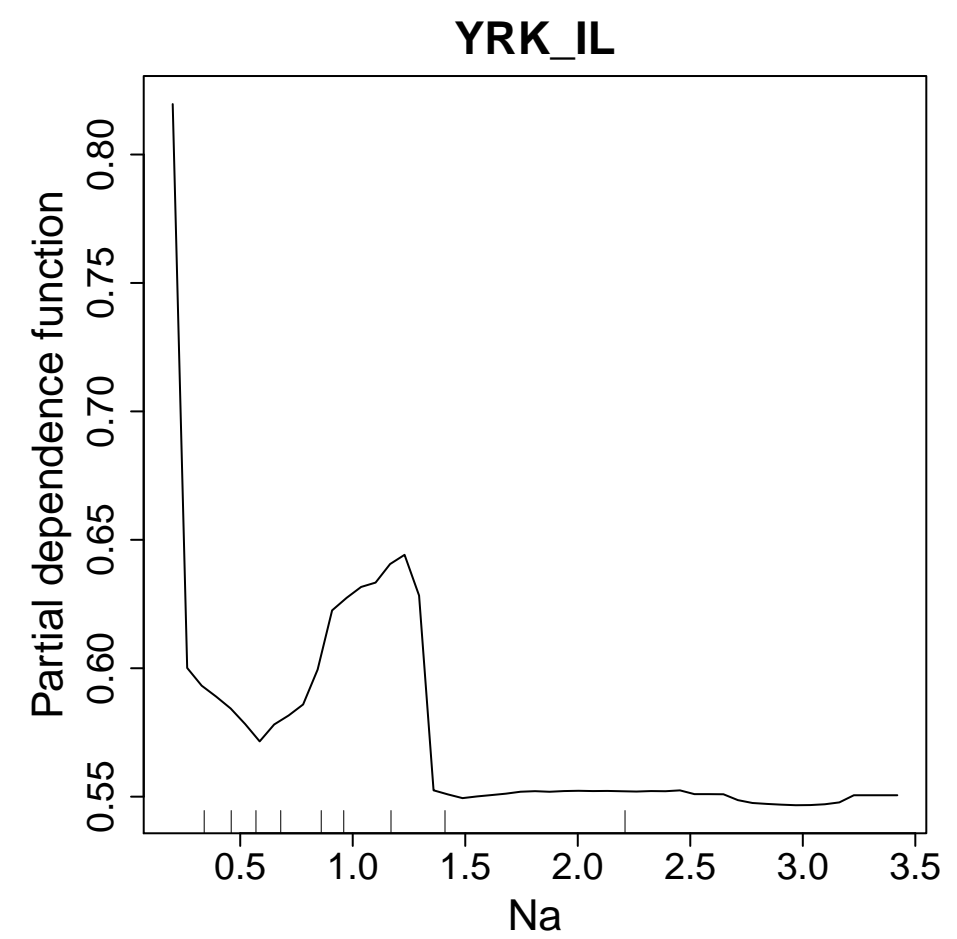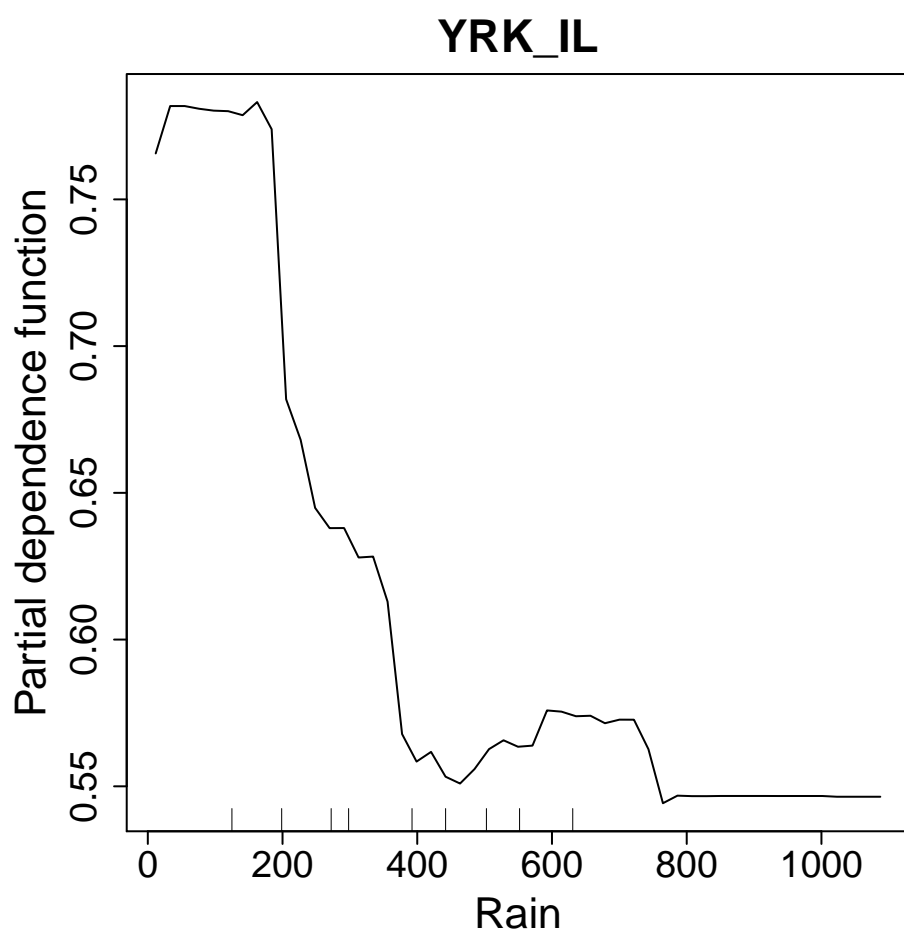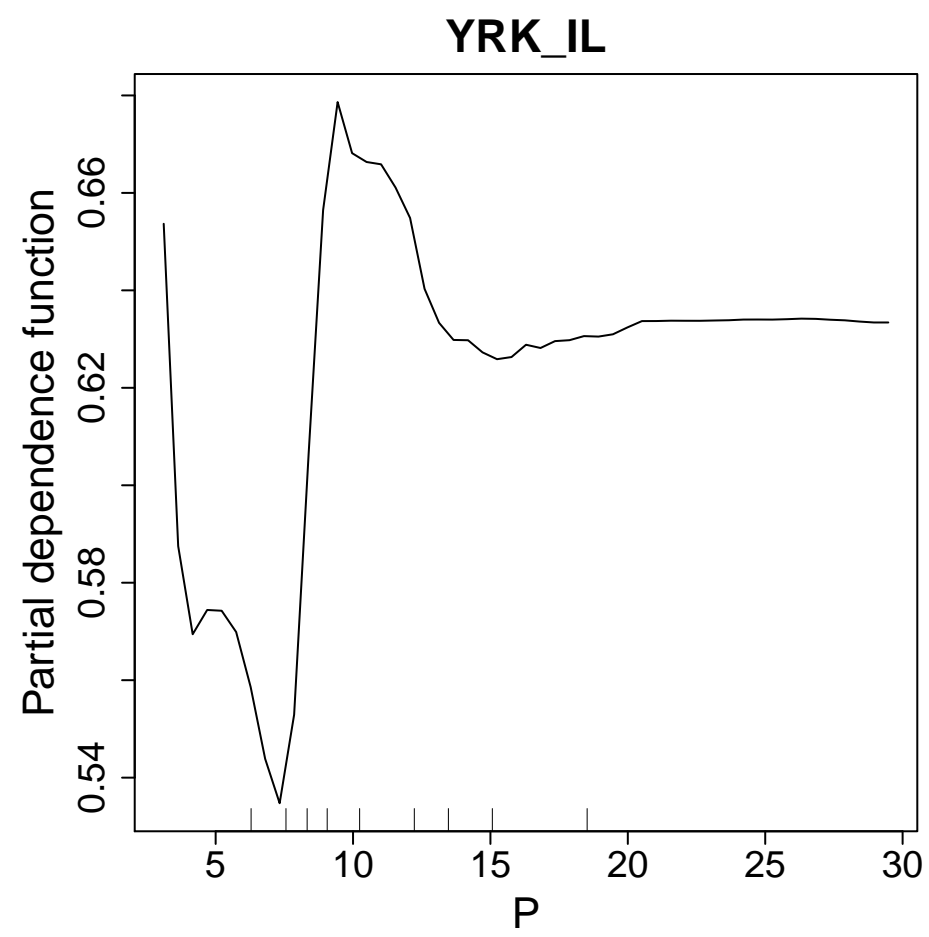

YRK\_RL

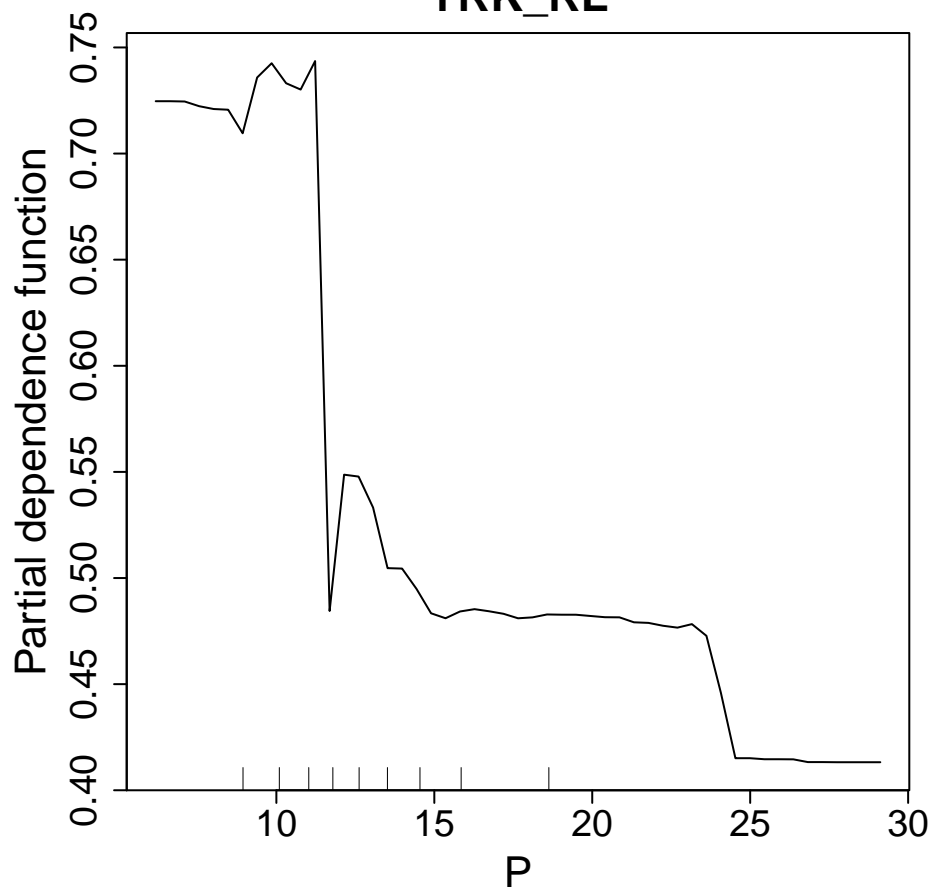

YRK\_RL

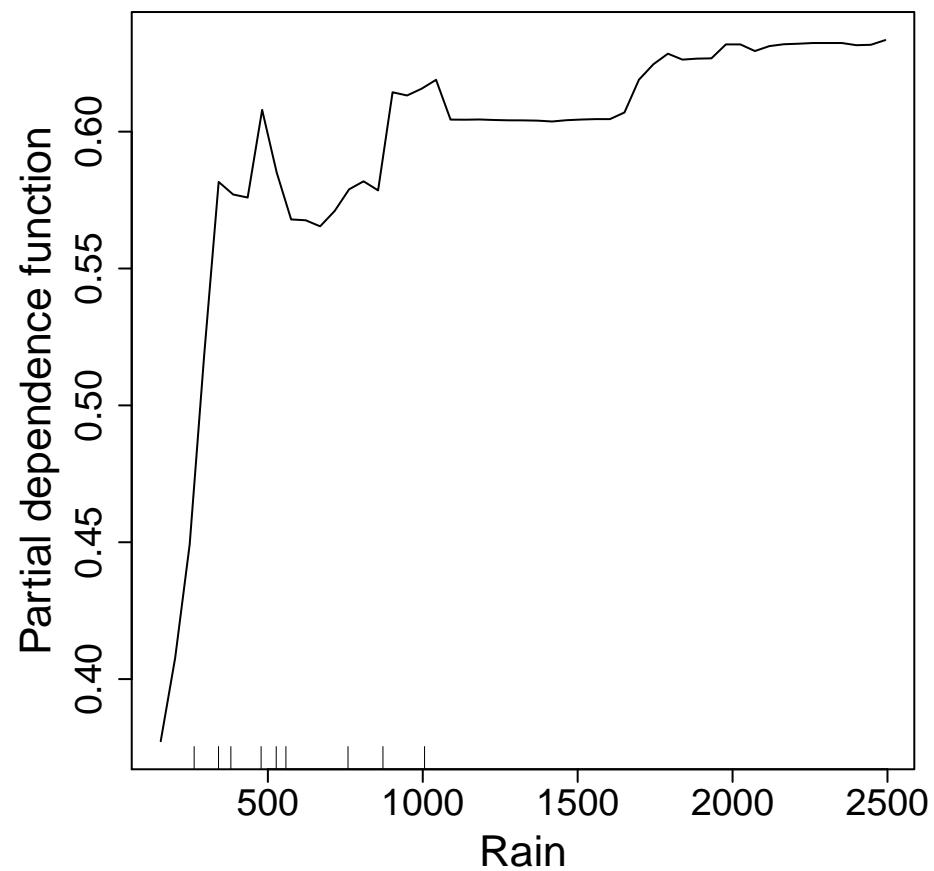

YRK\_RL

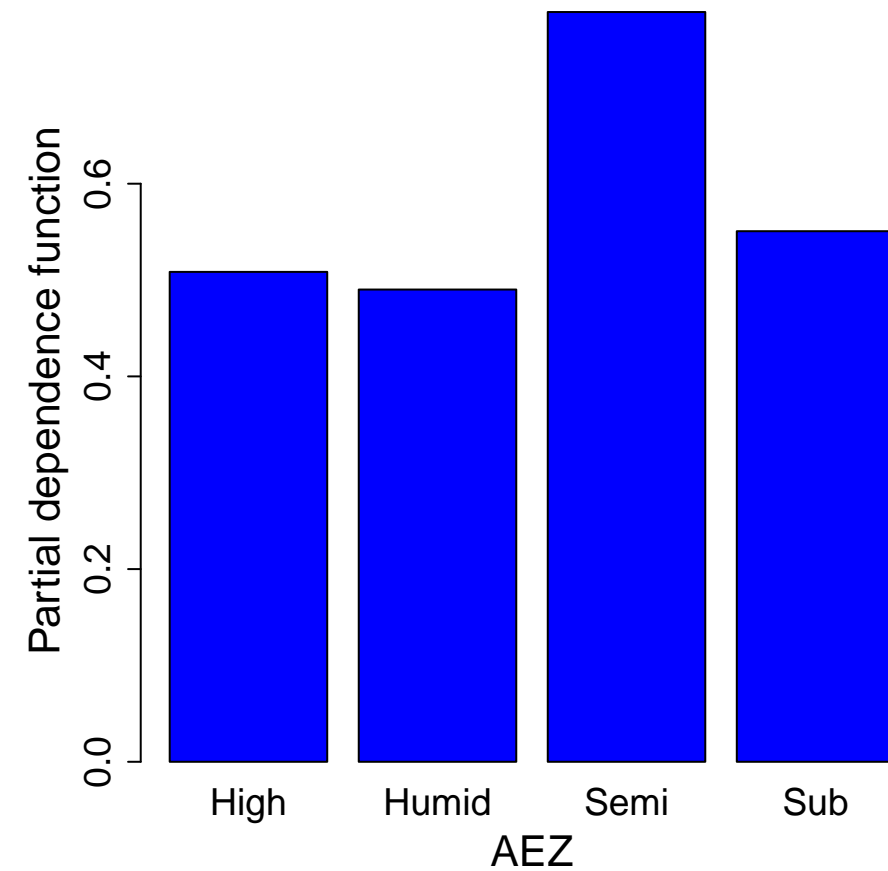

YRK\_RL

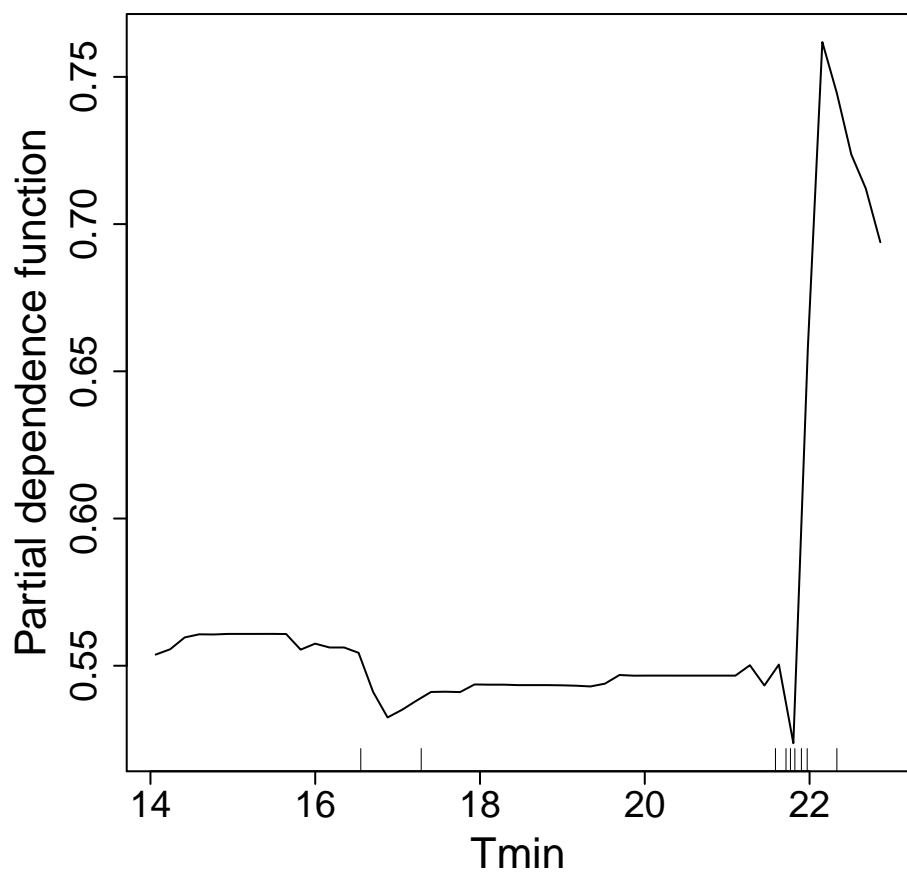

YRK\_RL

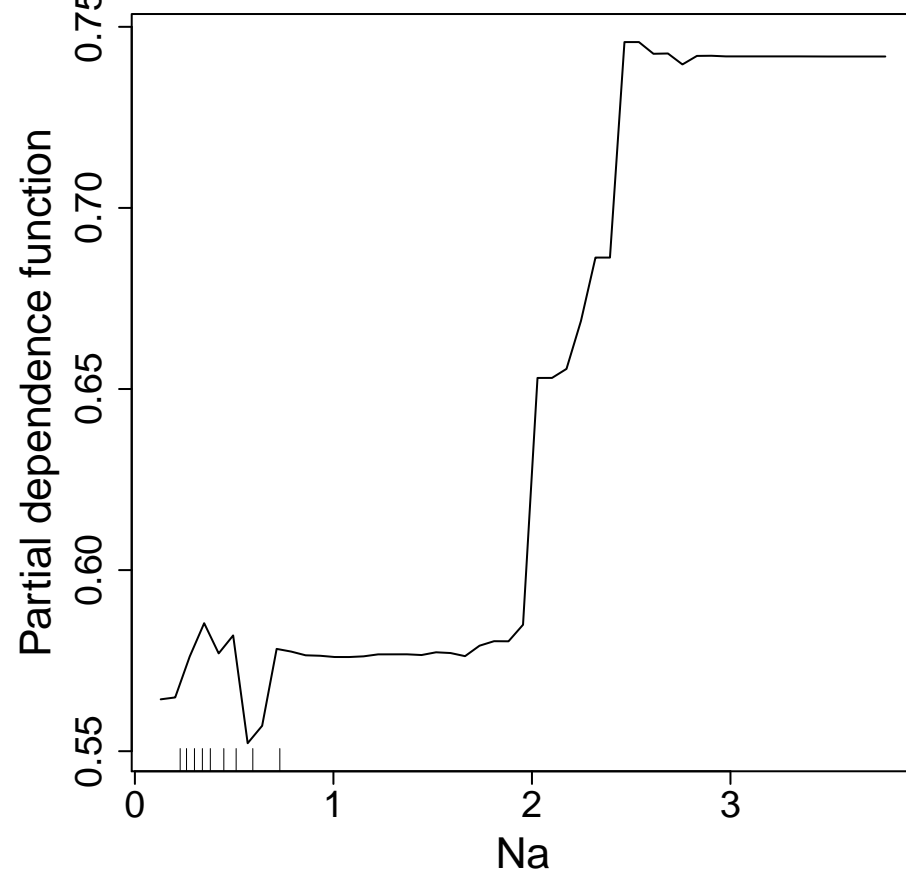

**YRK\_RU**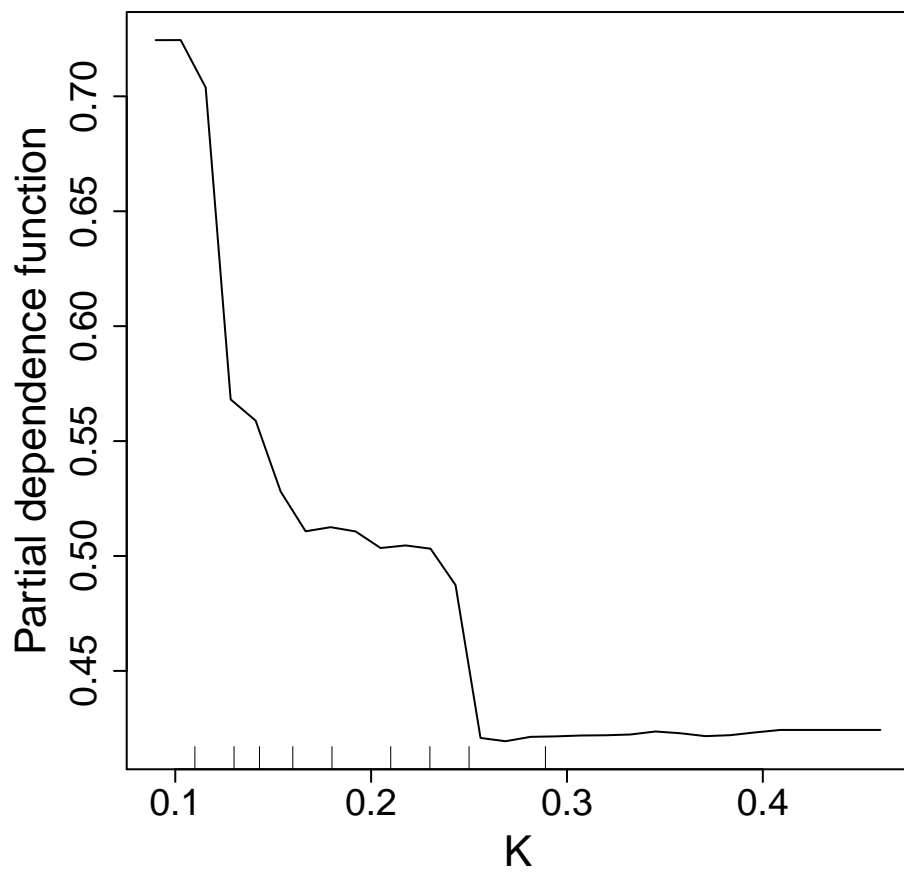**YRK\_RU**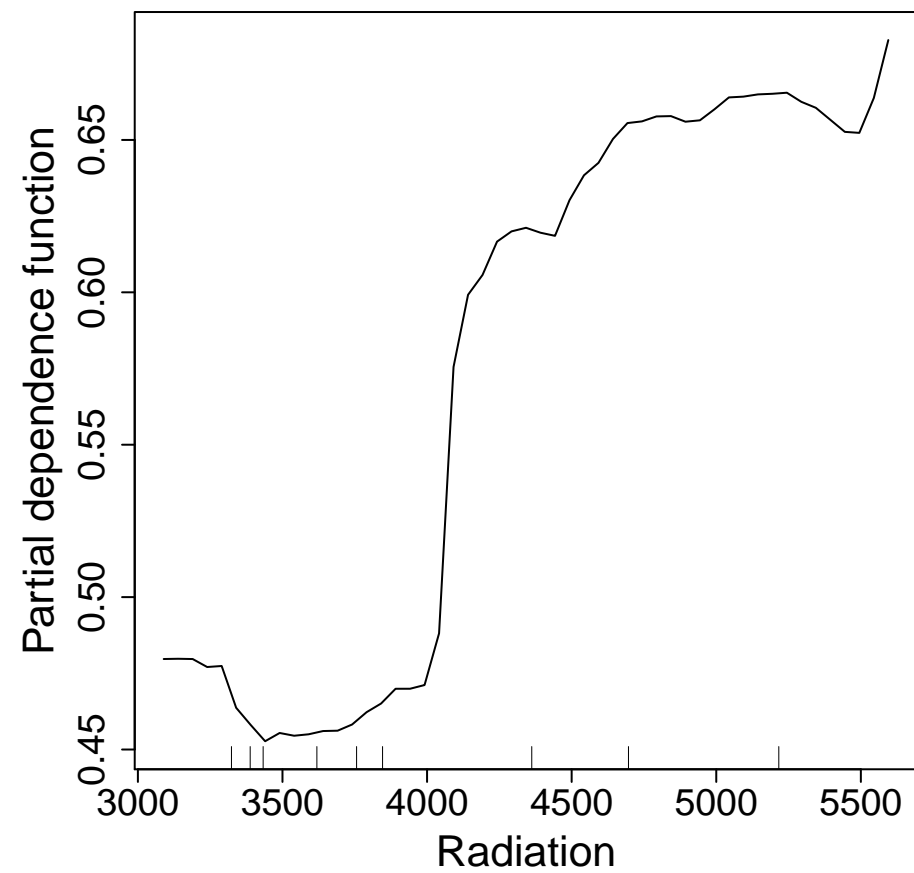**YRK\_RU**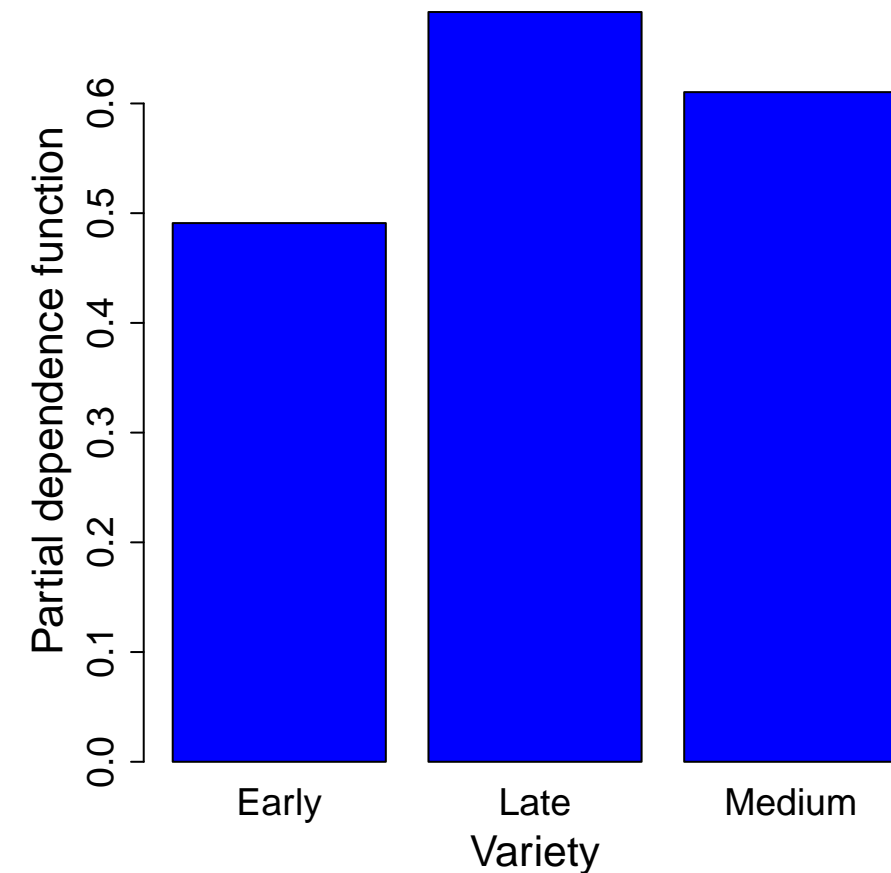**YRK\_RU**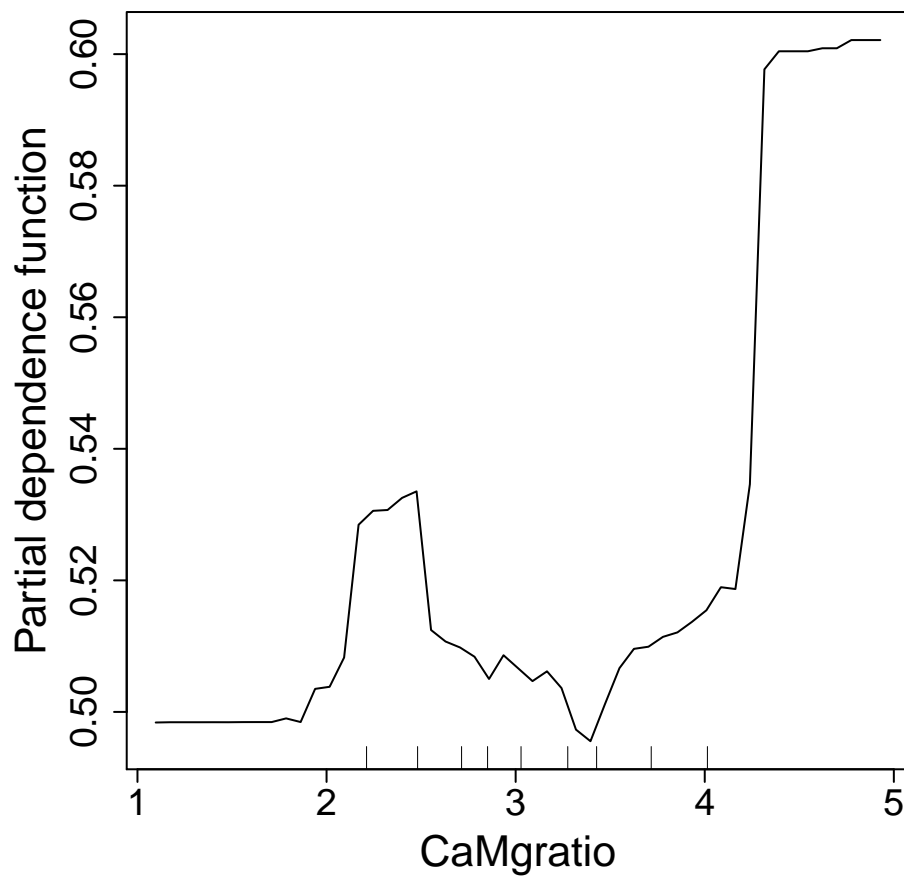**YRK\_RU**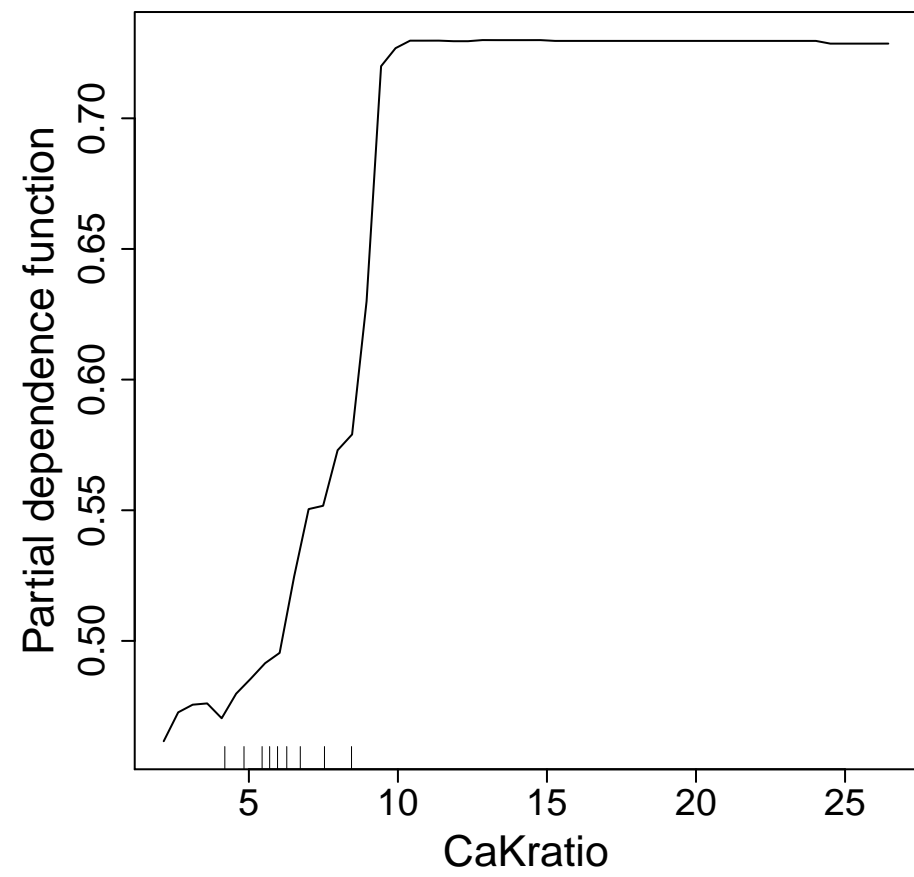

**AEN\_IL**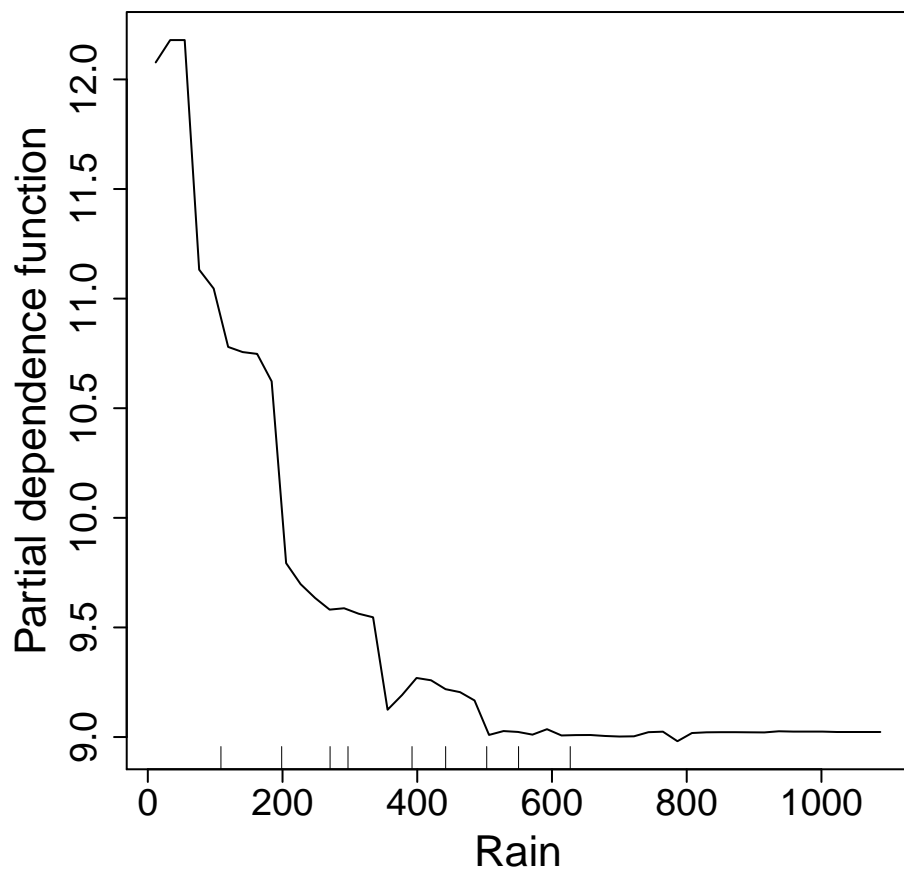**AEN\_IL**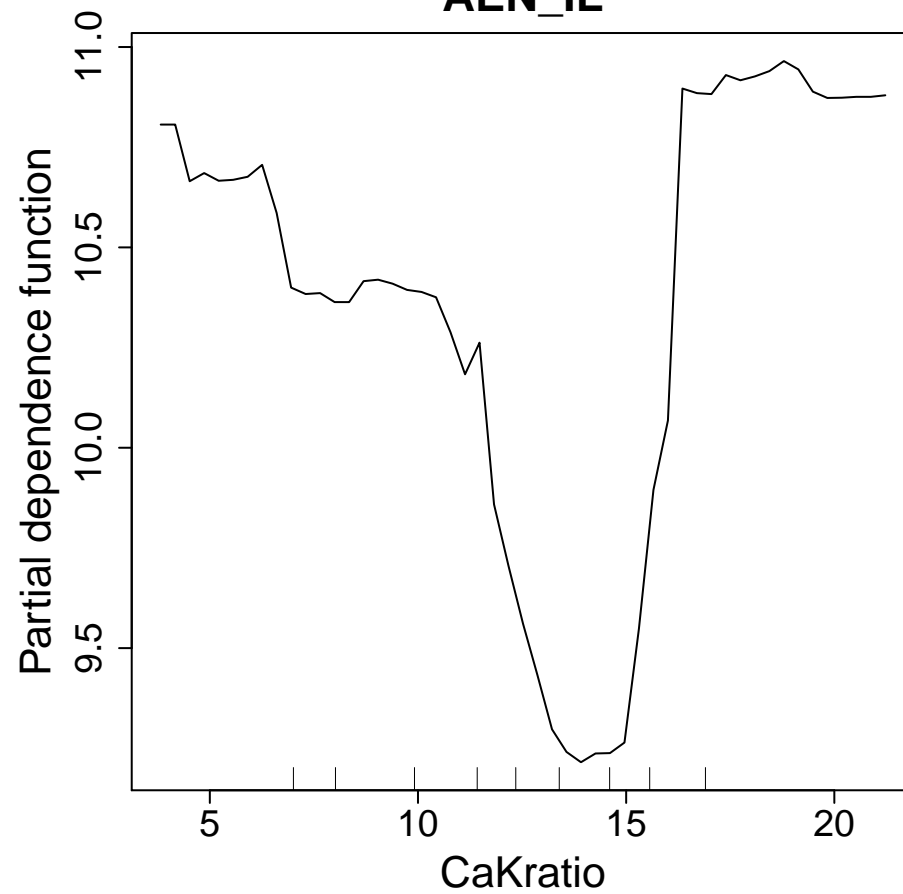**AEN\_IL**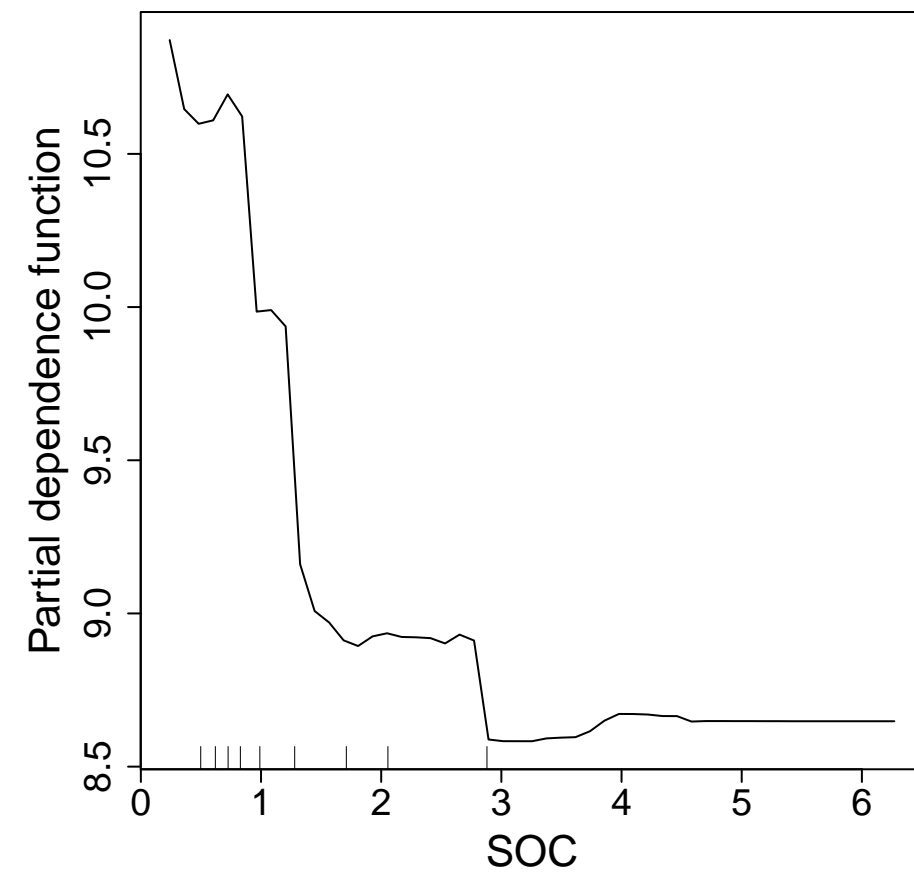**AEN\_IL**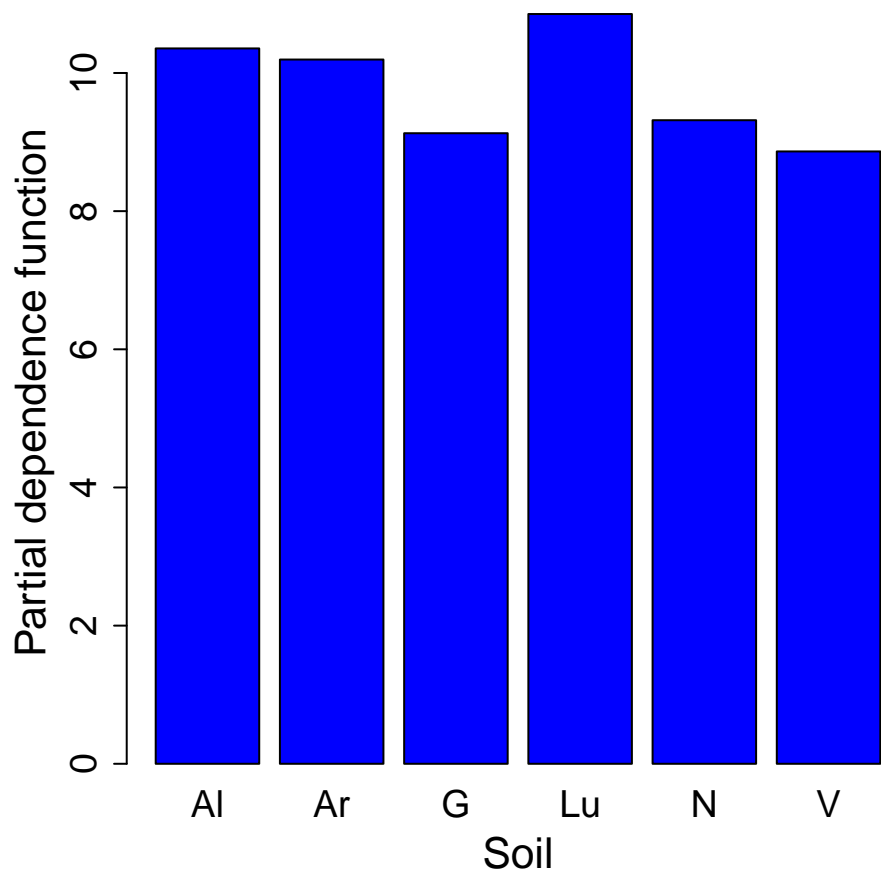**AEN\_IL**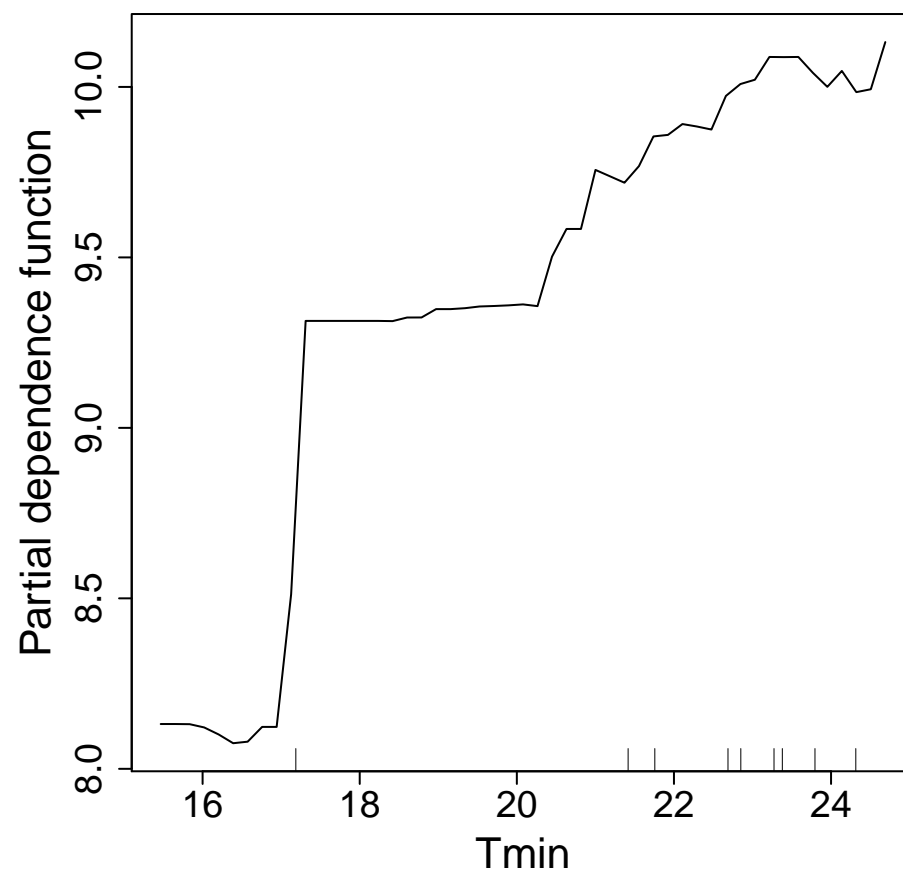

**AEN\_RL**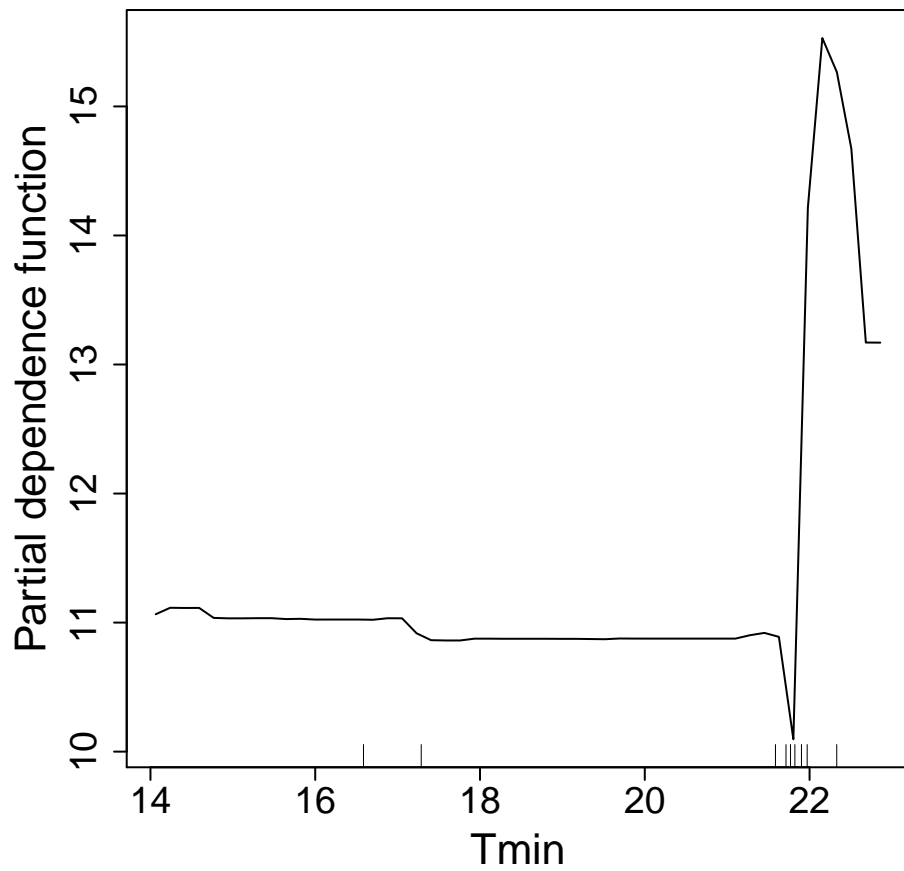**AEN\_RL**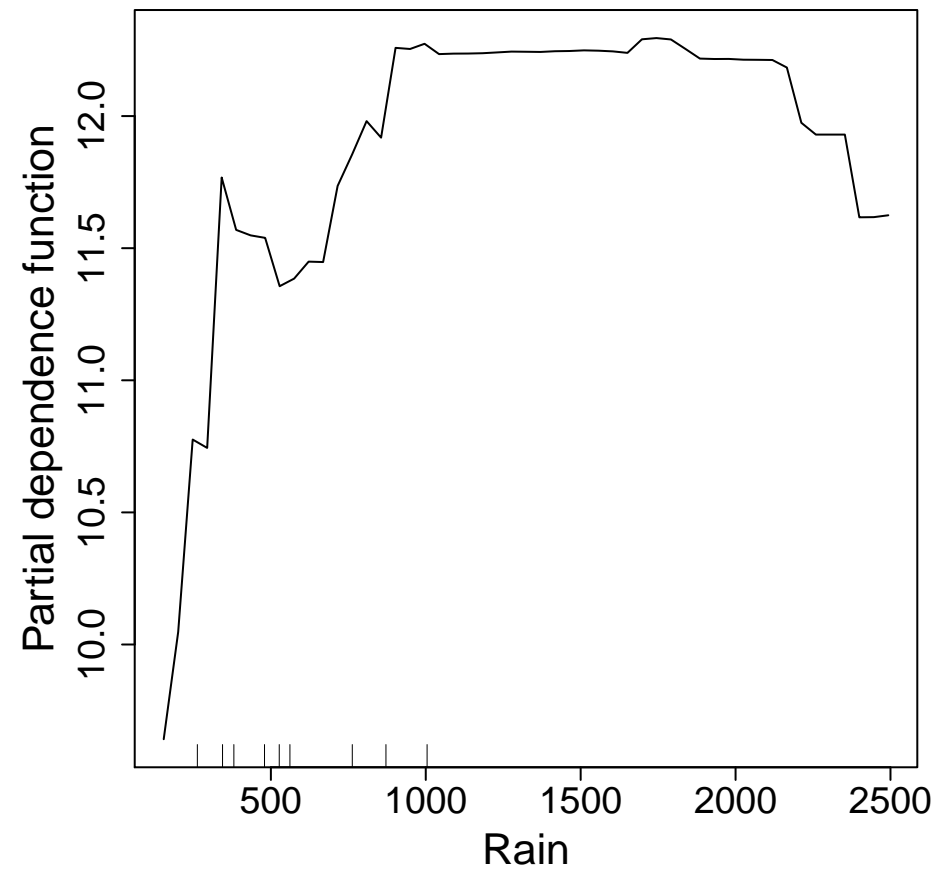**AEN\_RL**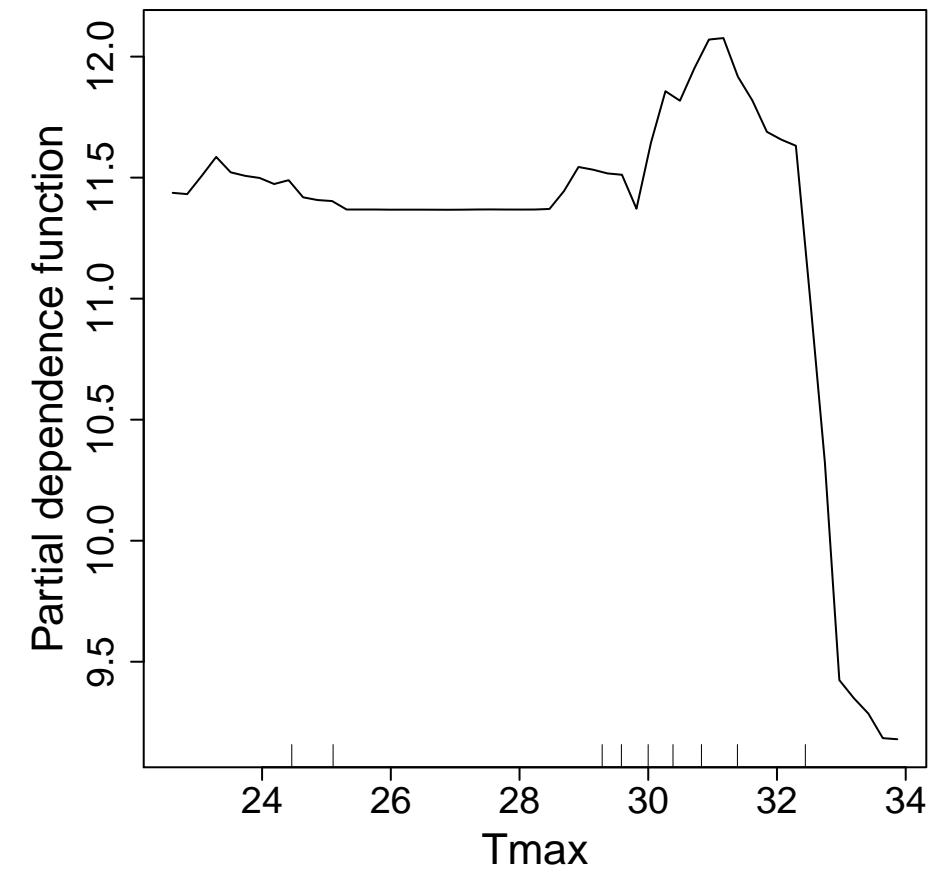**AEN\_RL**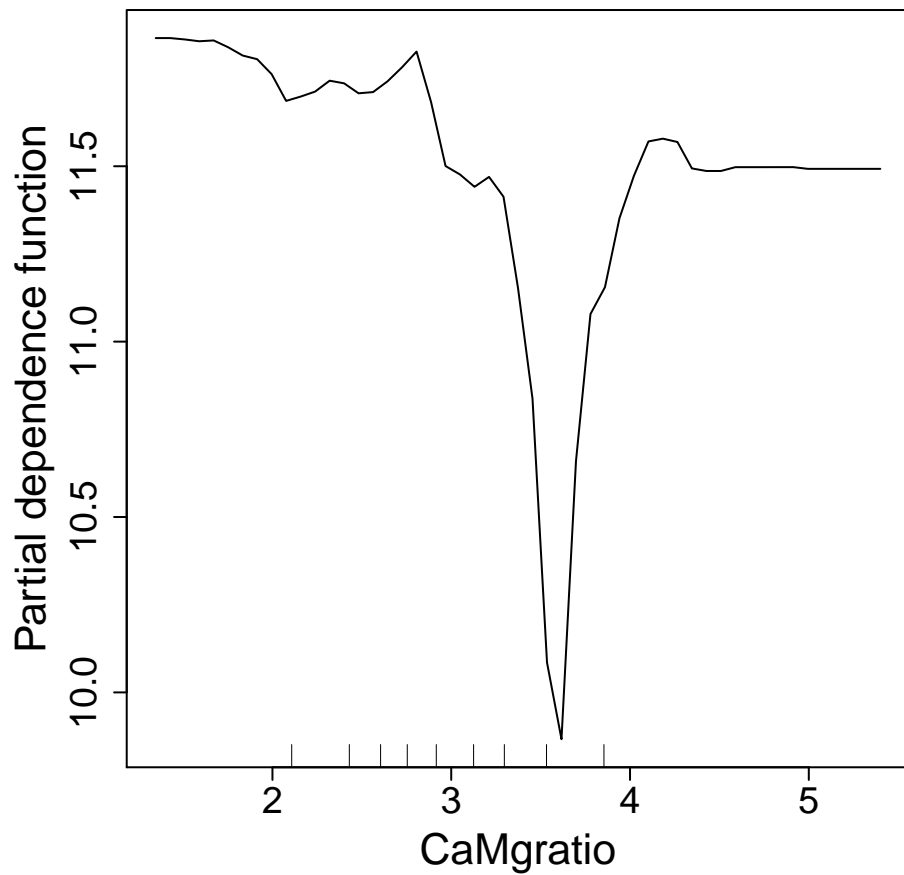**AEN\_RL**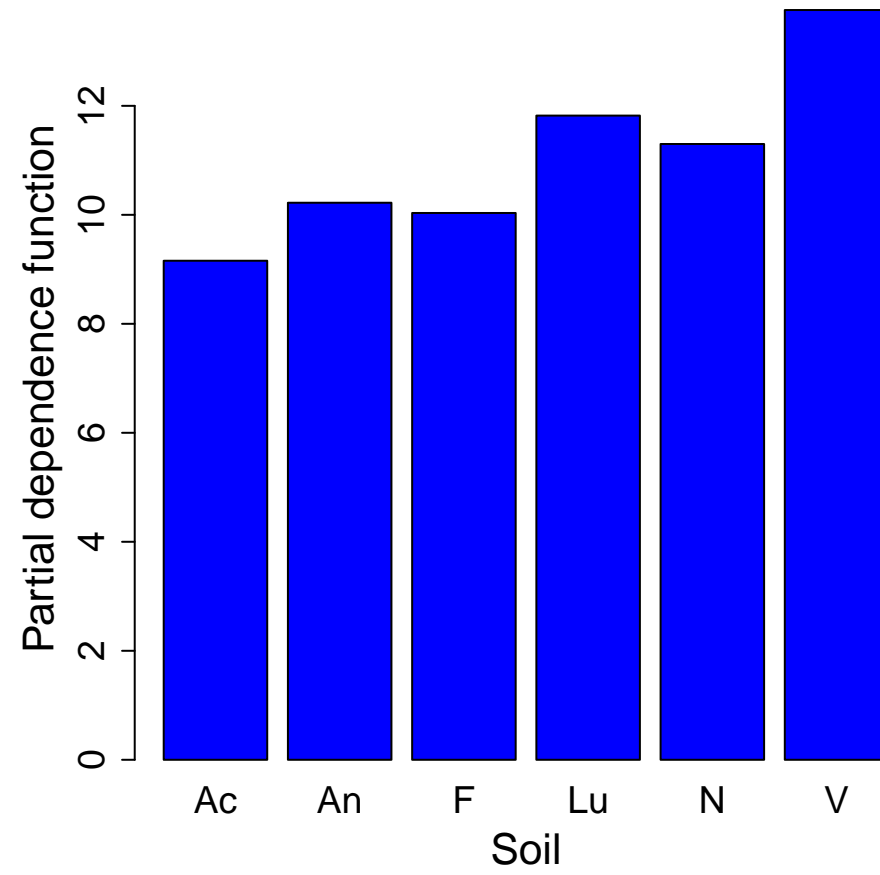

**AEN\_RU**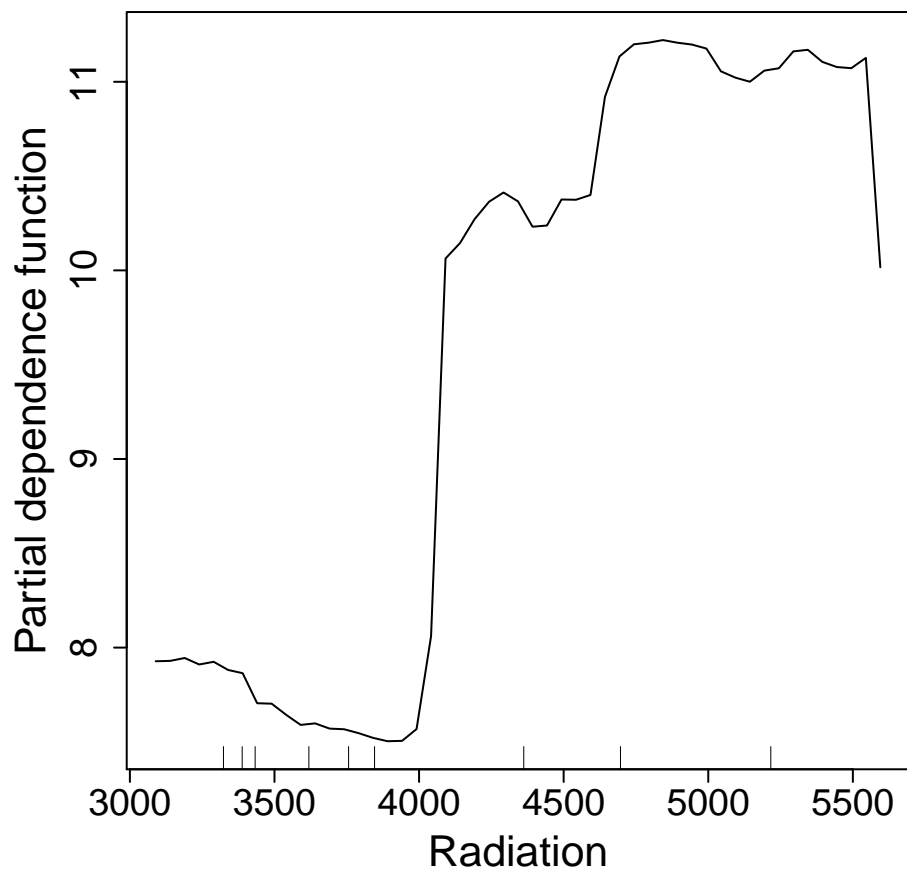**AEN\_RU**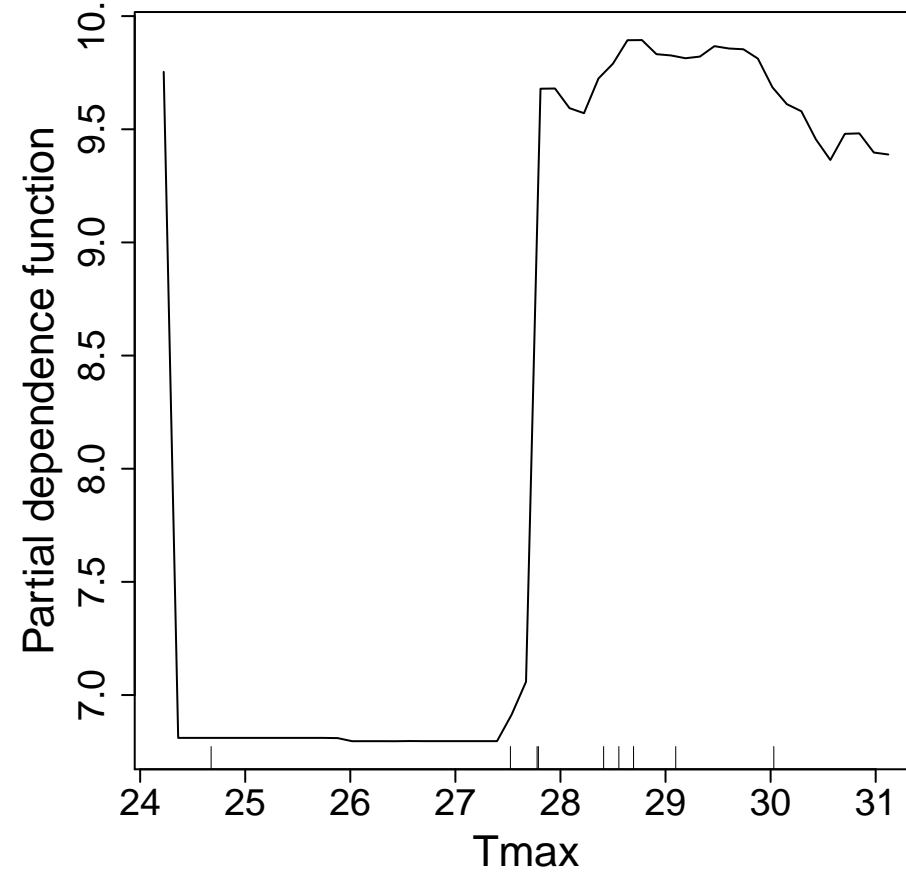**AEN\_RU**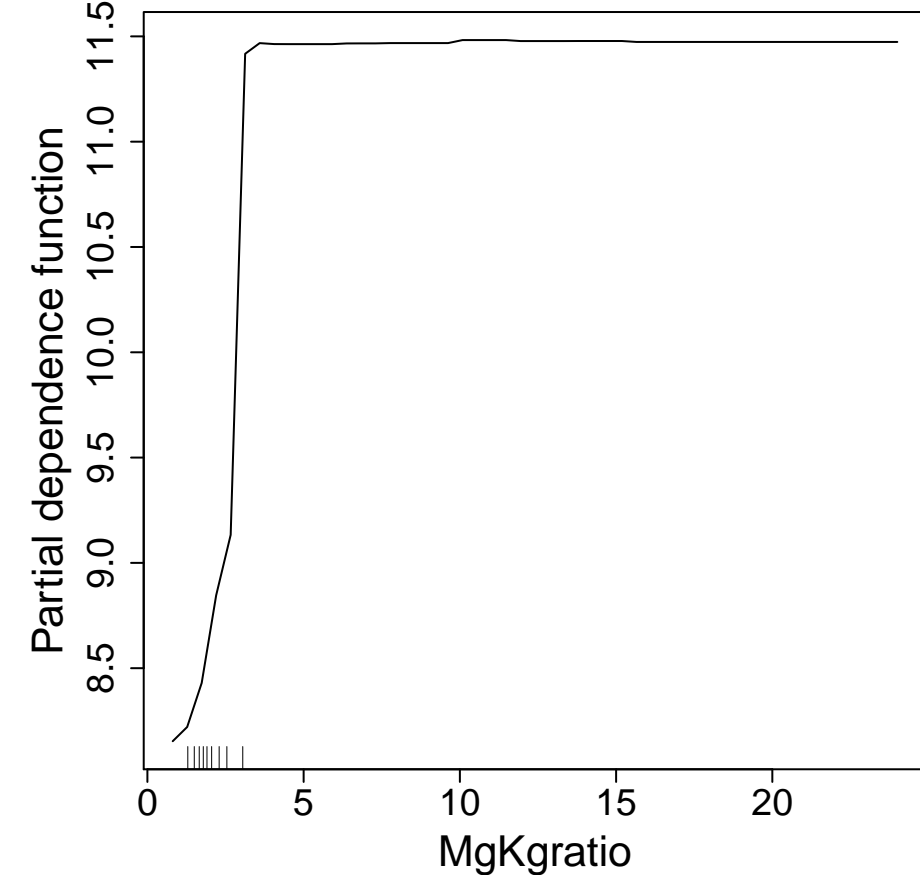**AEN\_RU**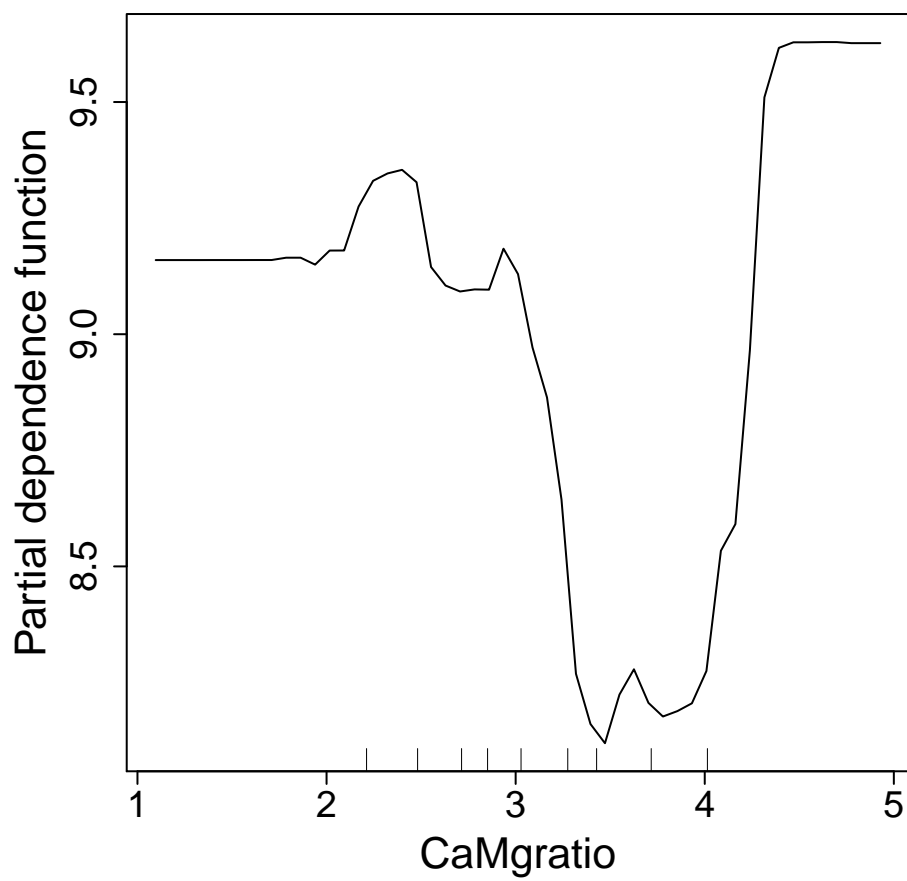**AEN\_RU**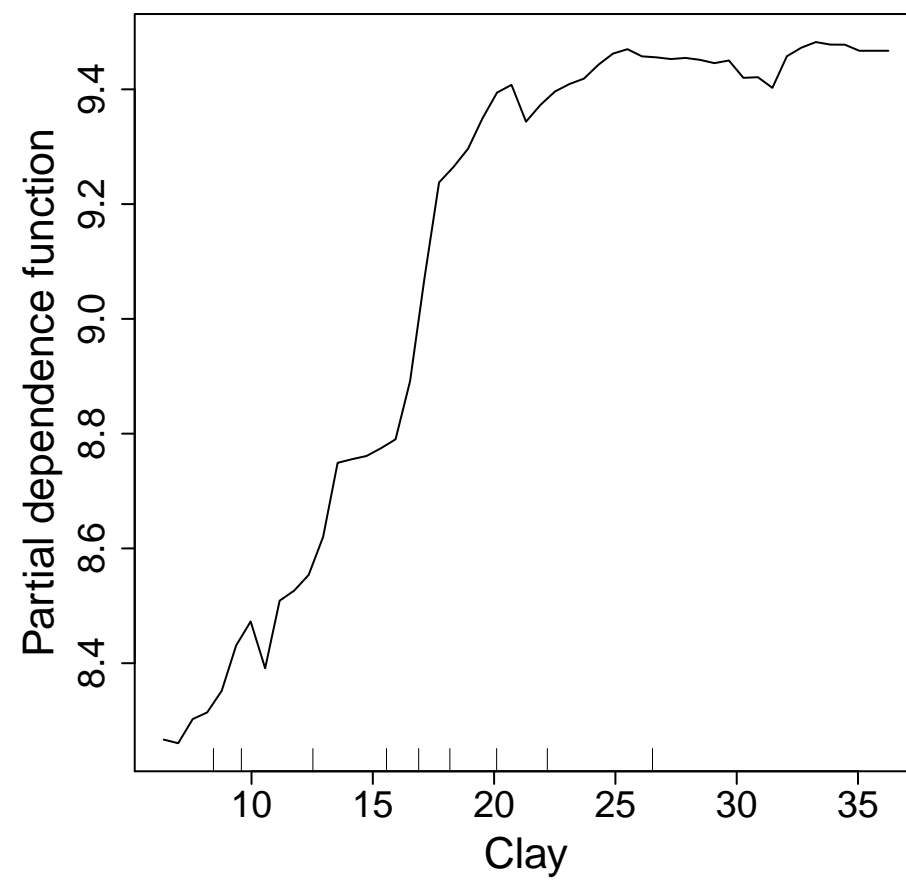

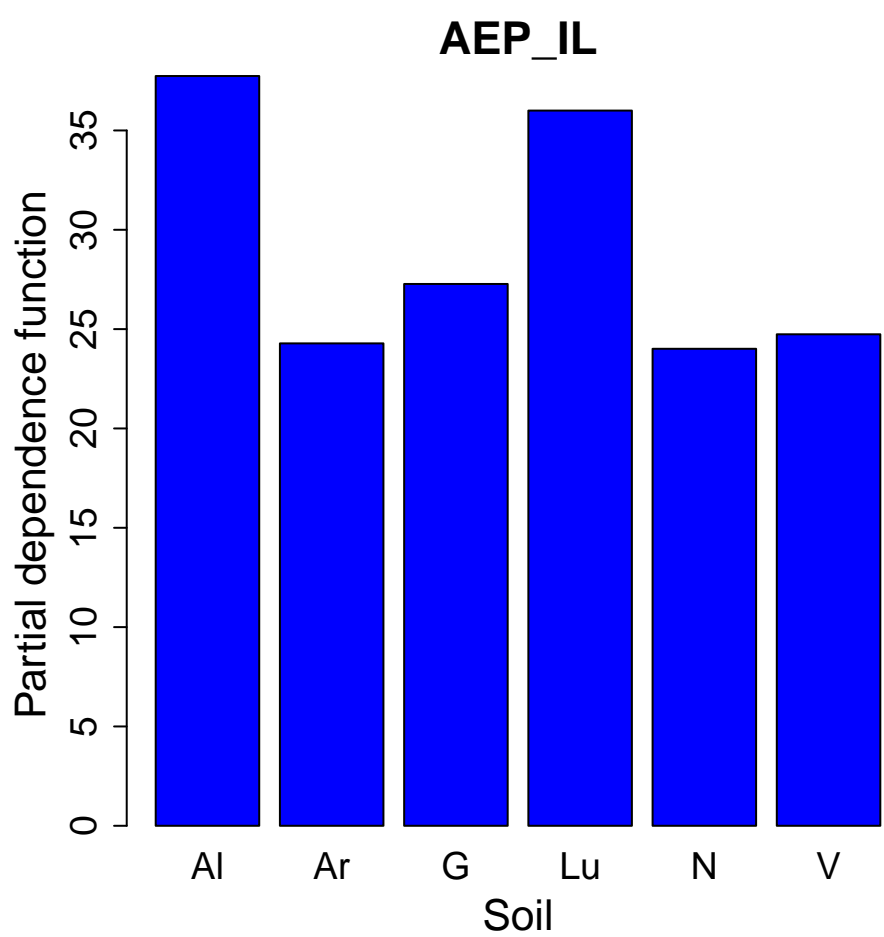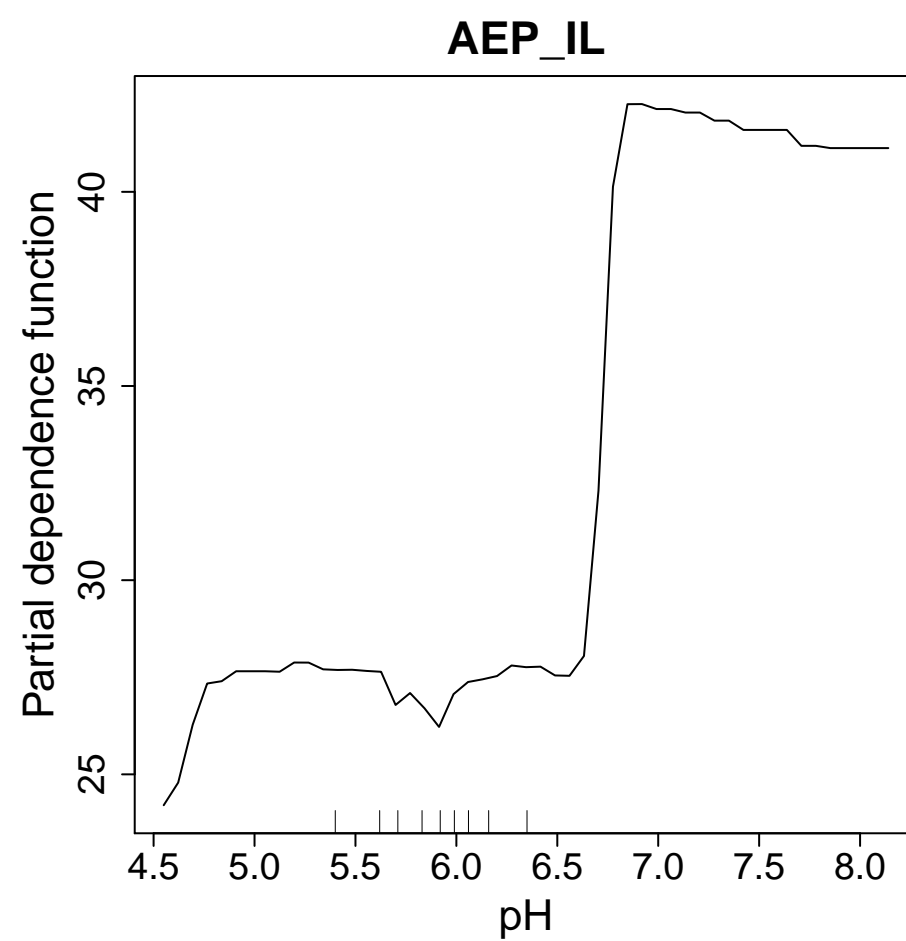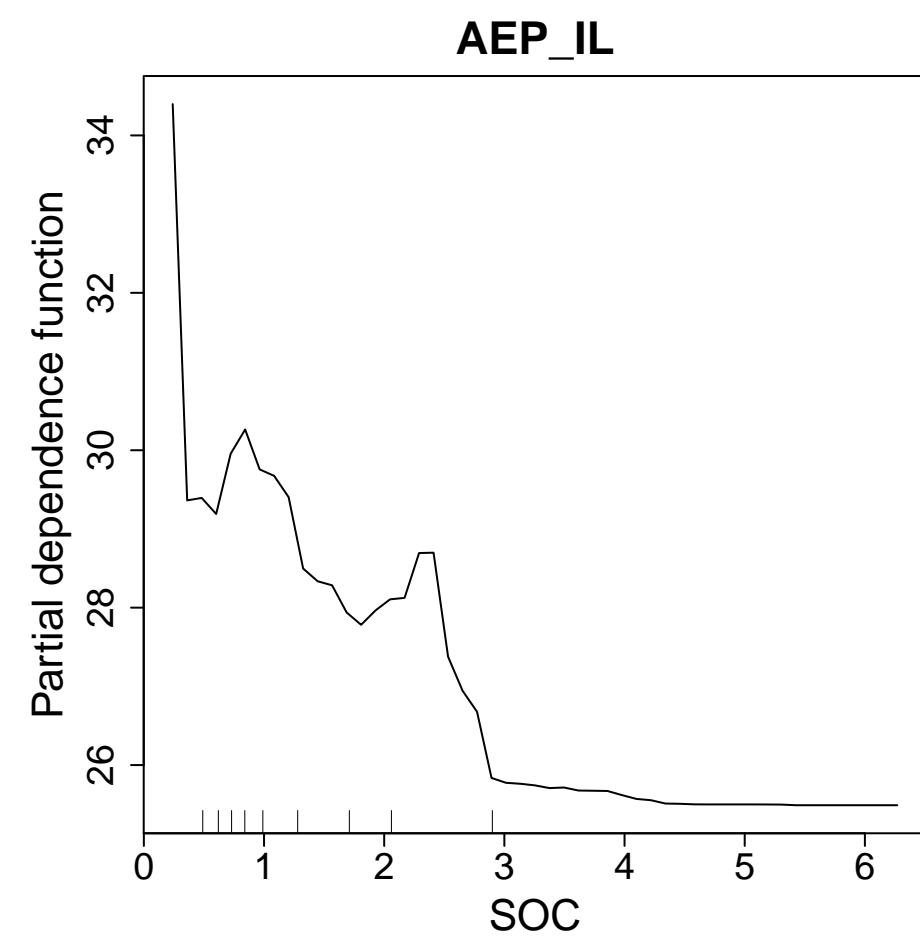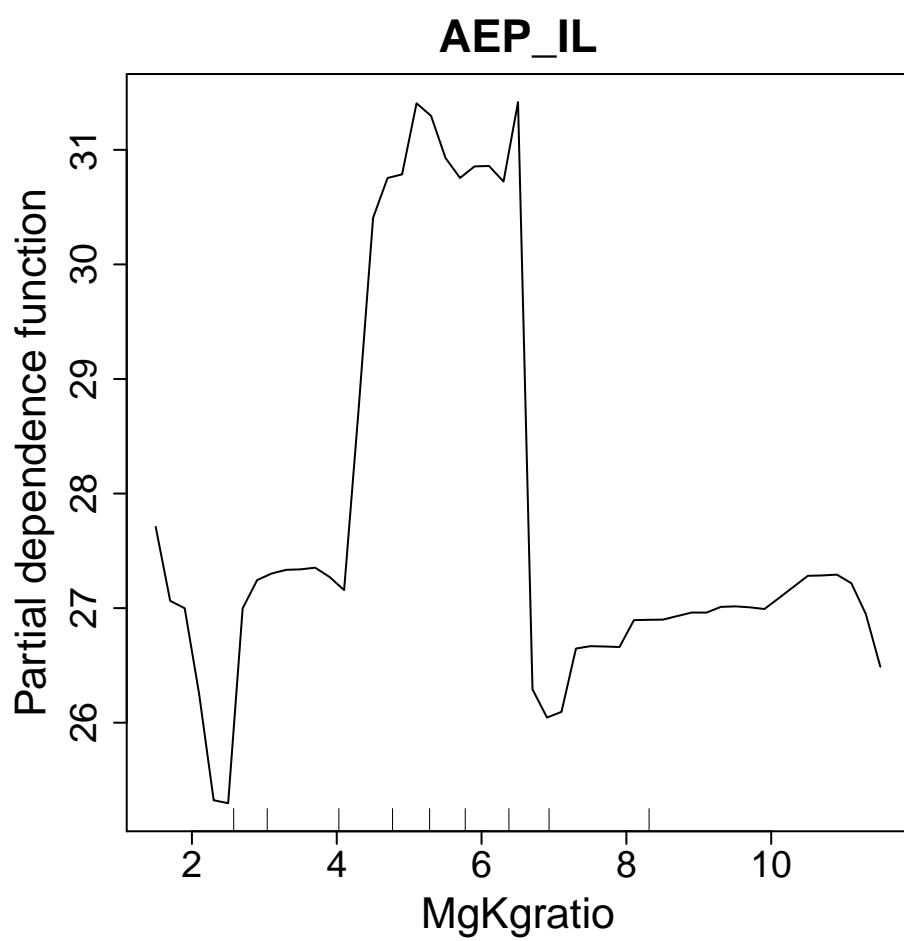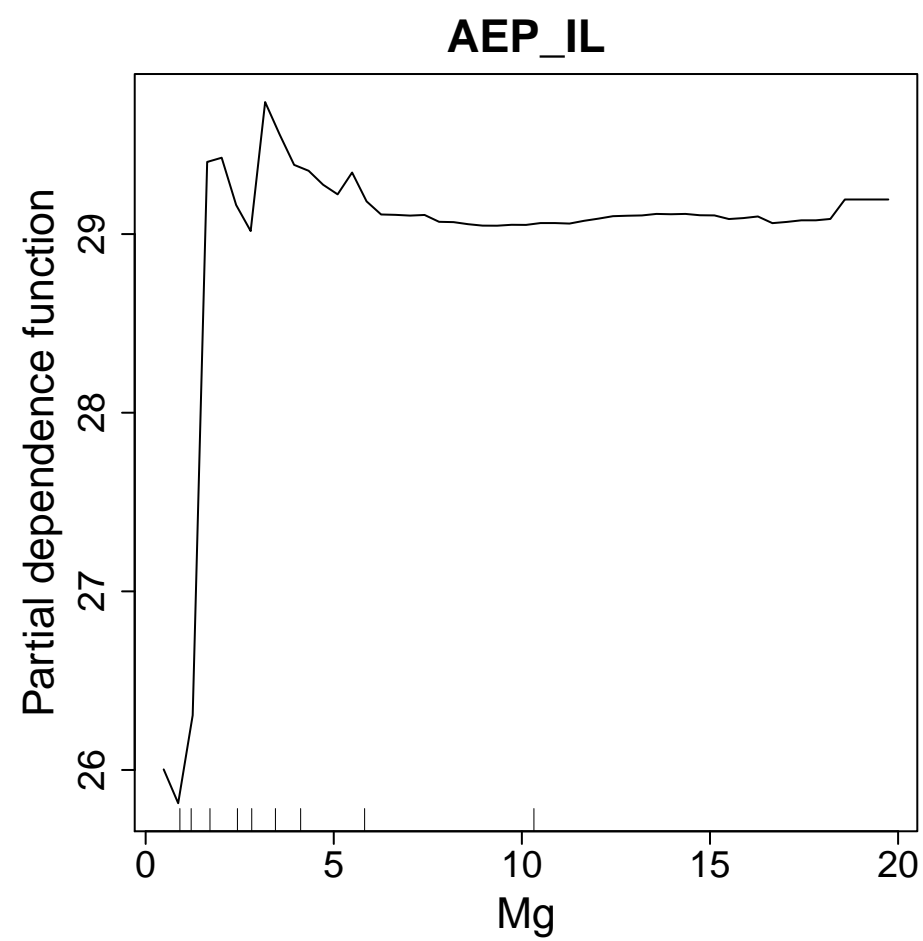



**AEP\_RL**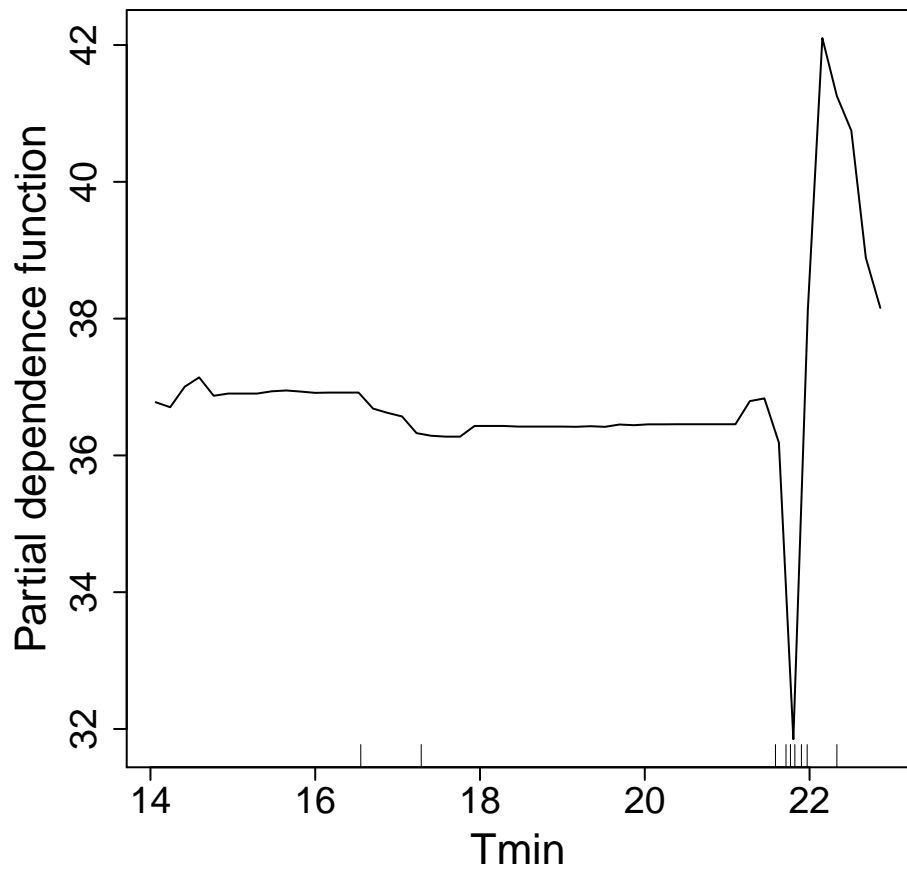**AEP\_RL**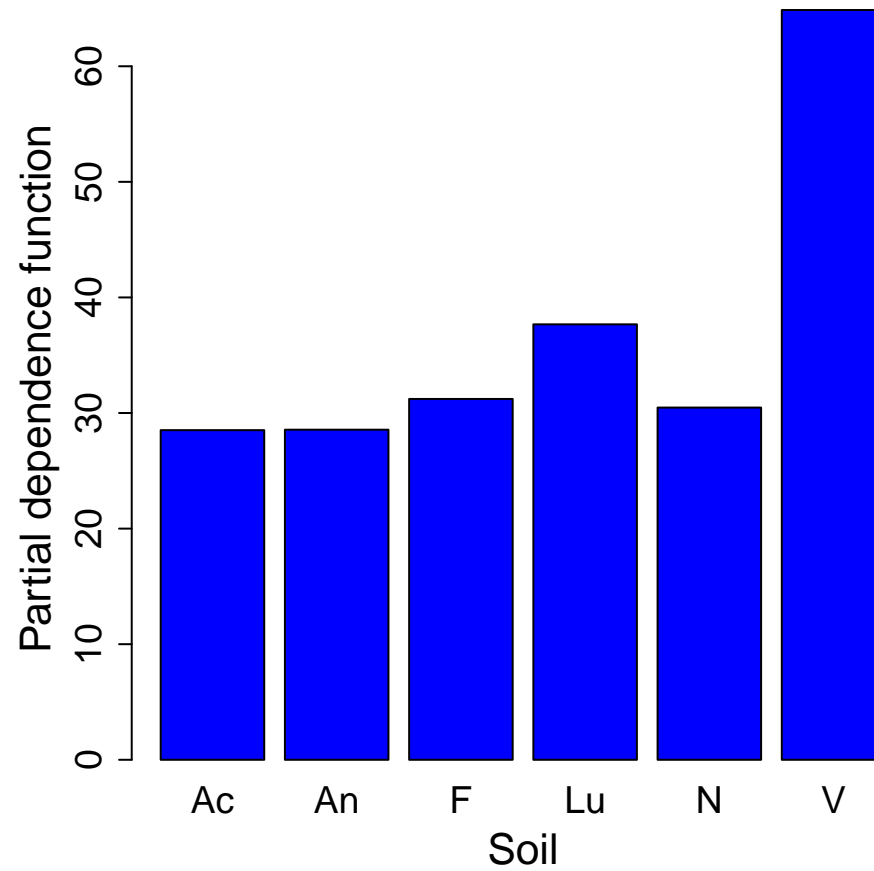**AEP\_RL**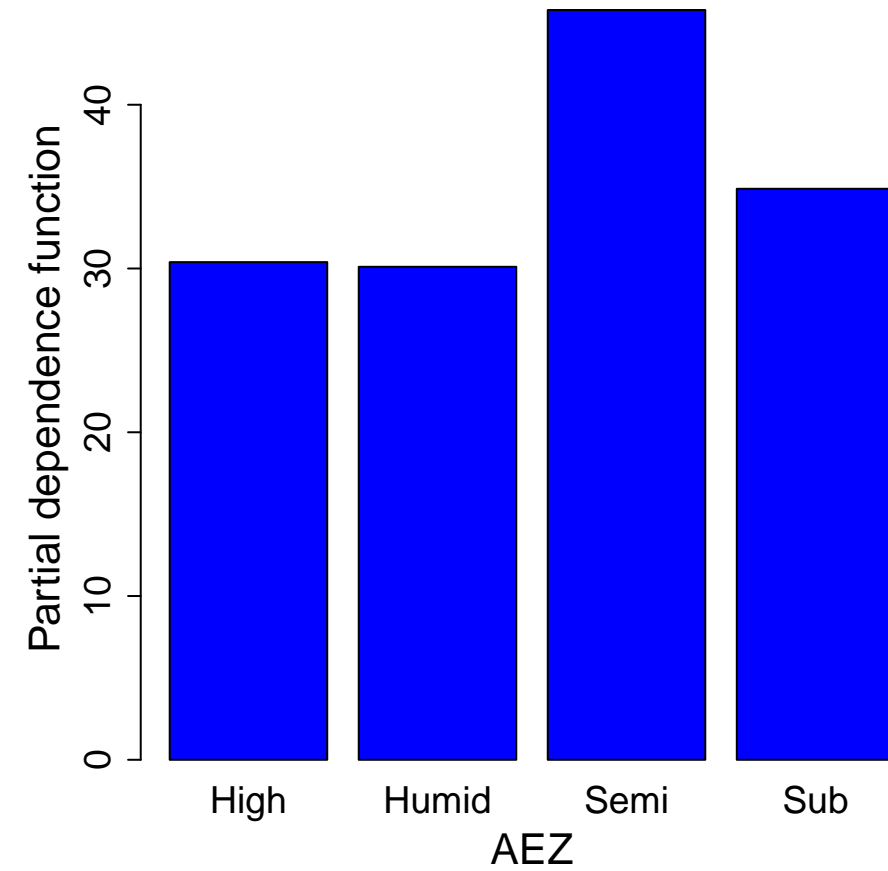**AEP\_RL**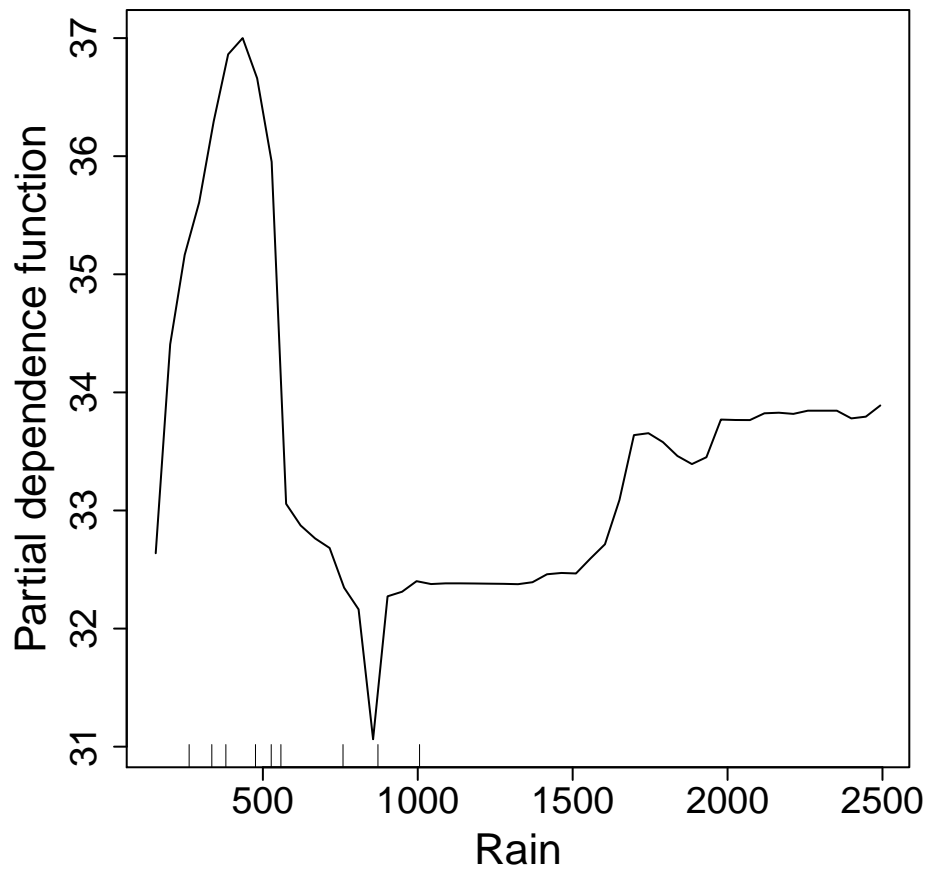**AEP\_RL**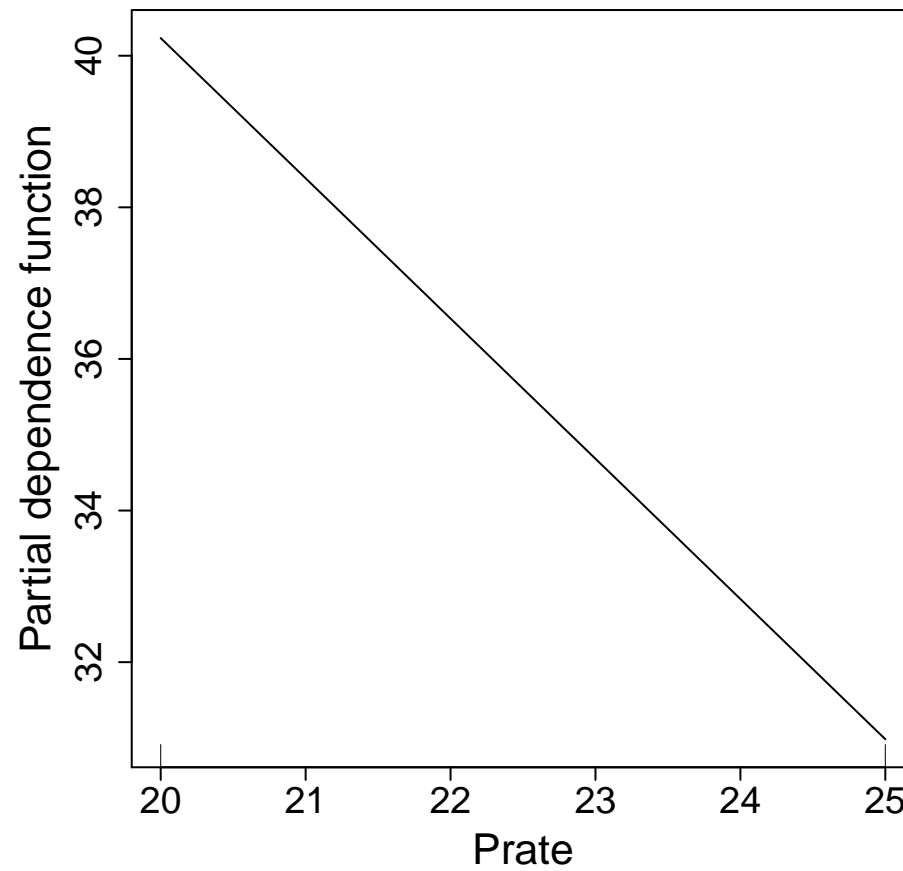

**AEP\_RU**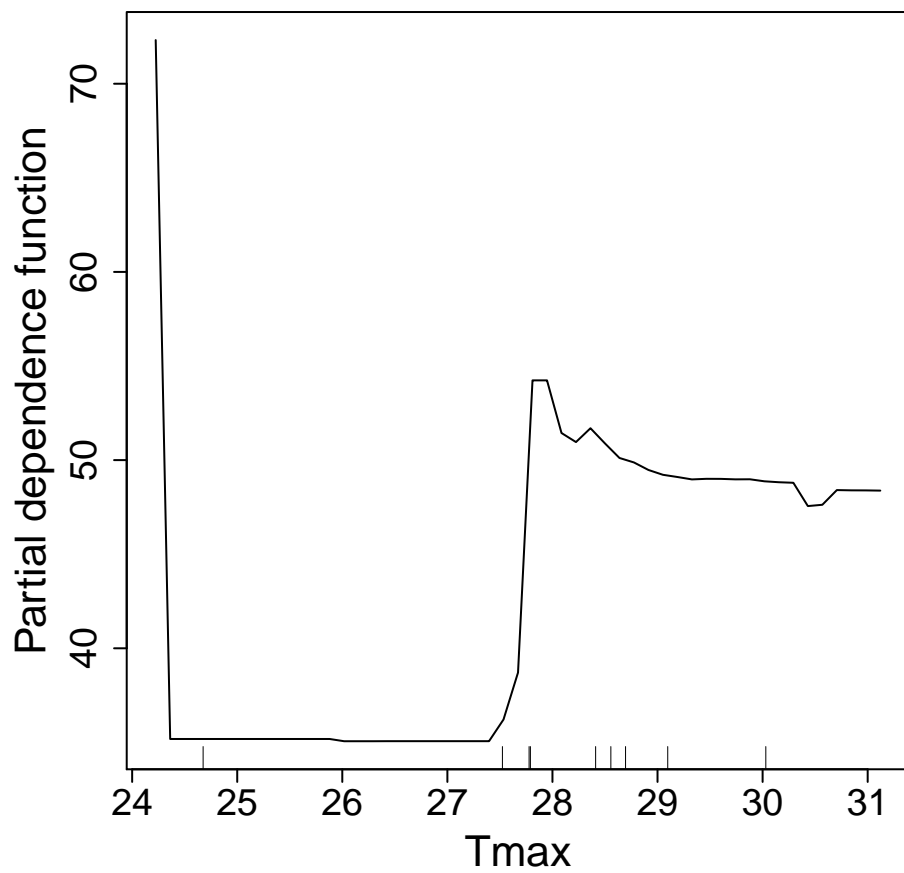**AEP\_RU**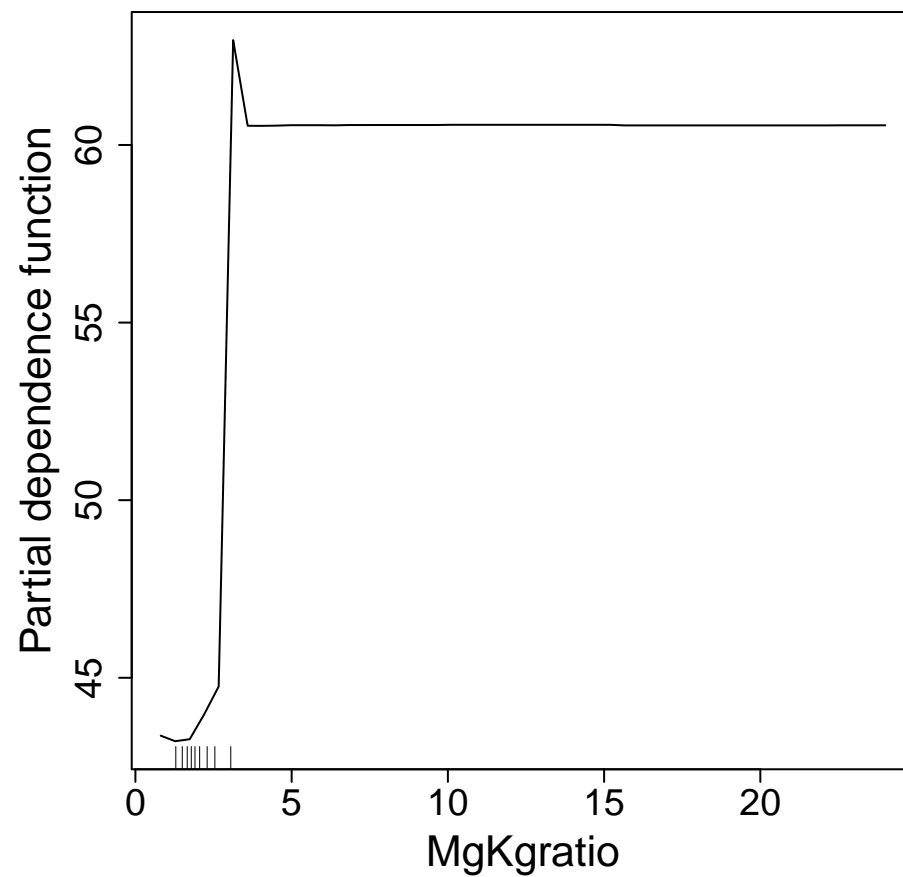**AEP\_RU**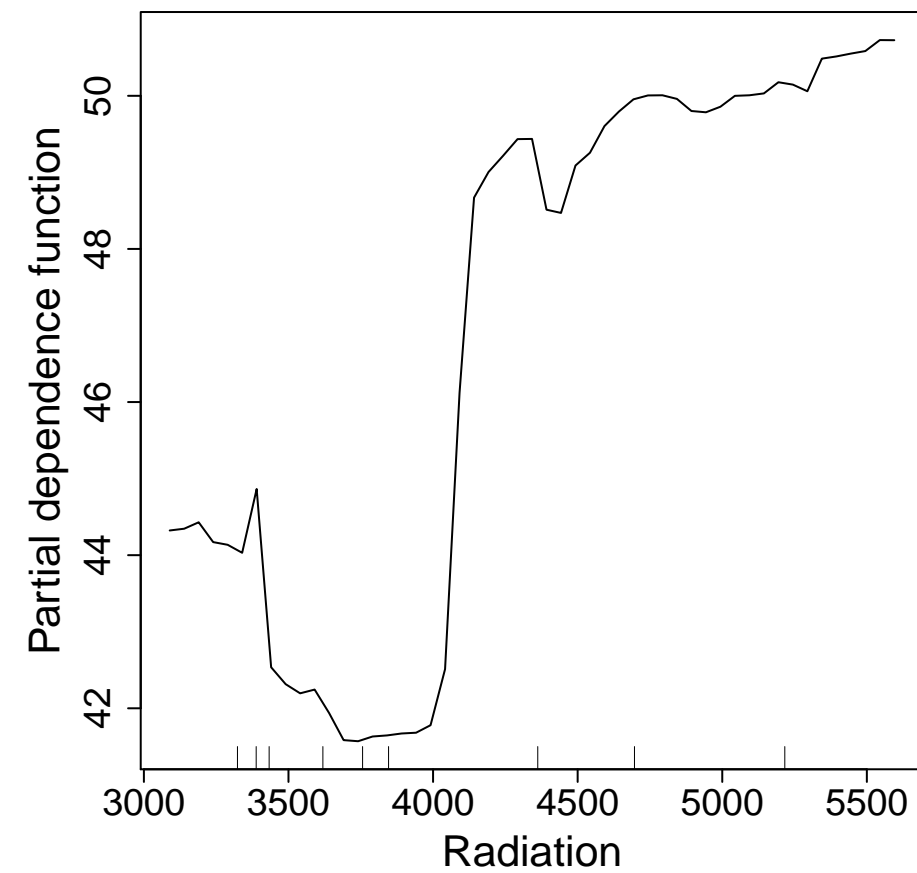**AEP\_RU**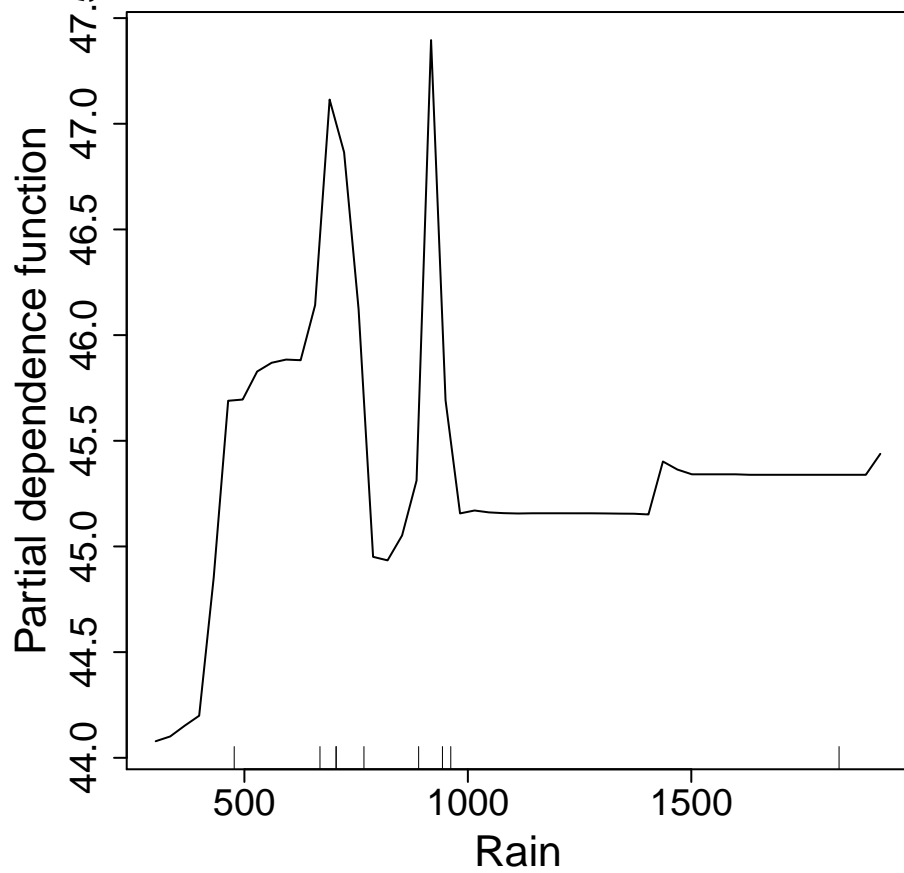**AEP\_RU**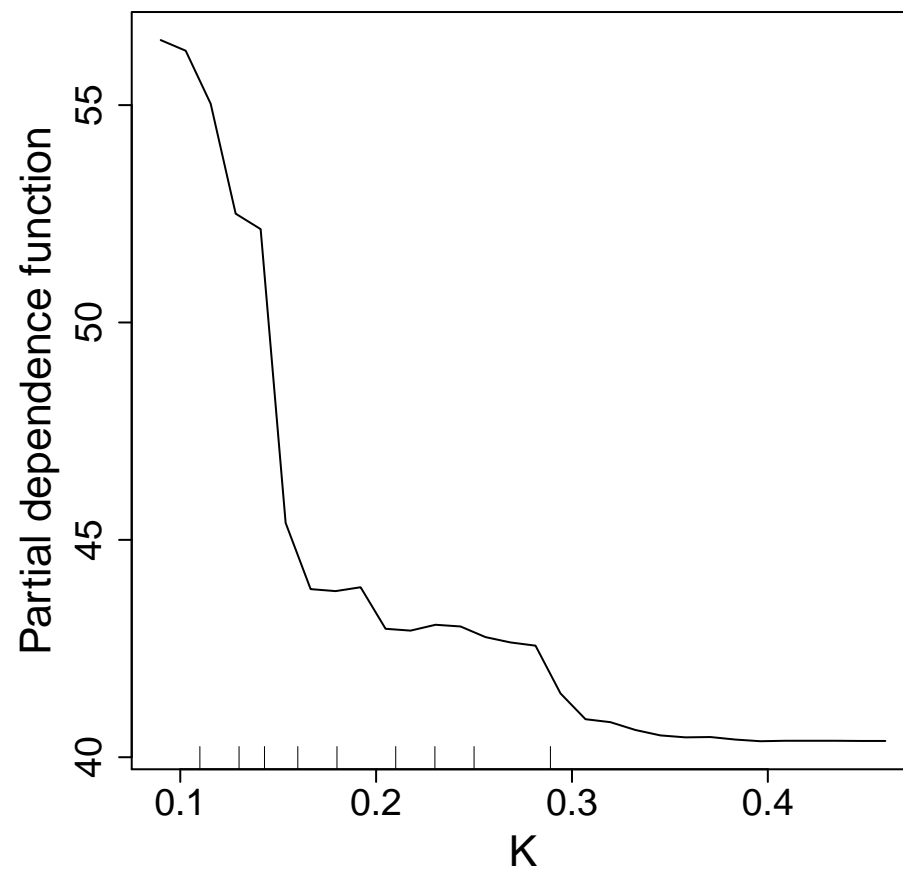

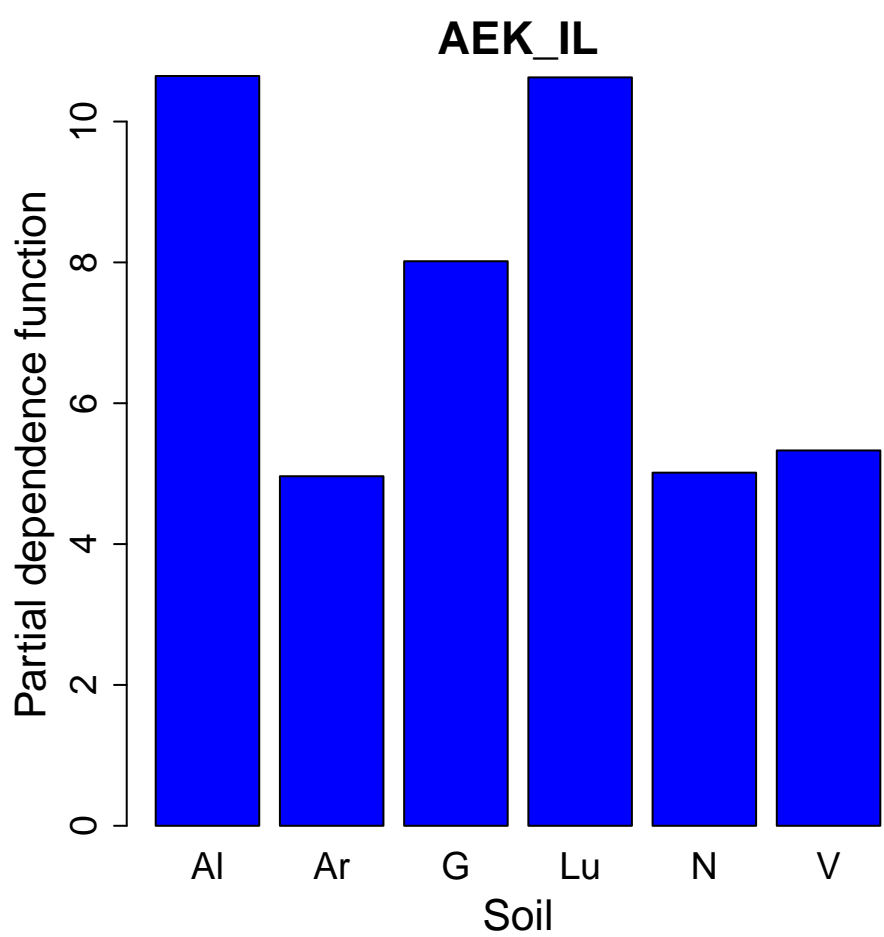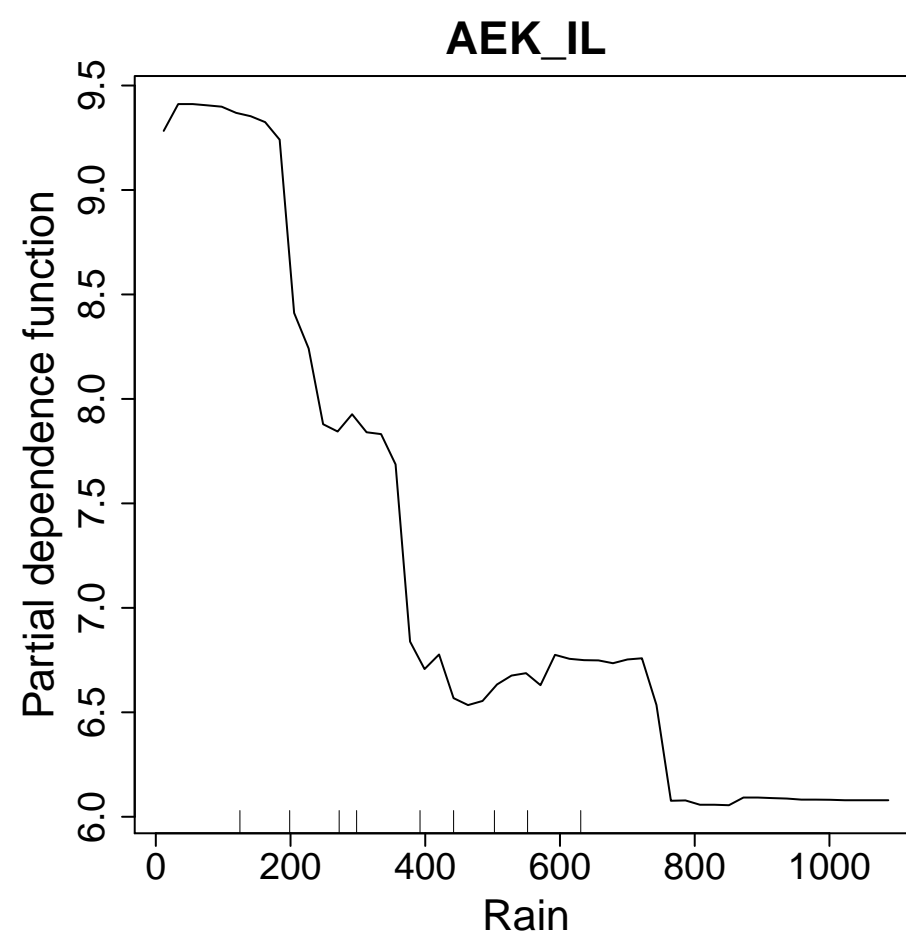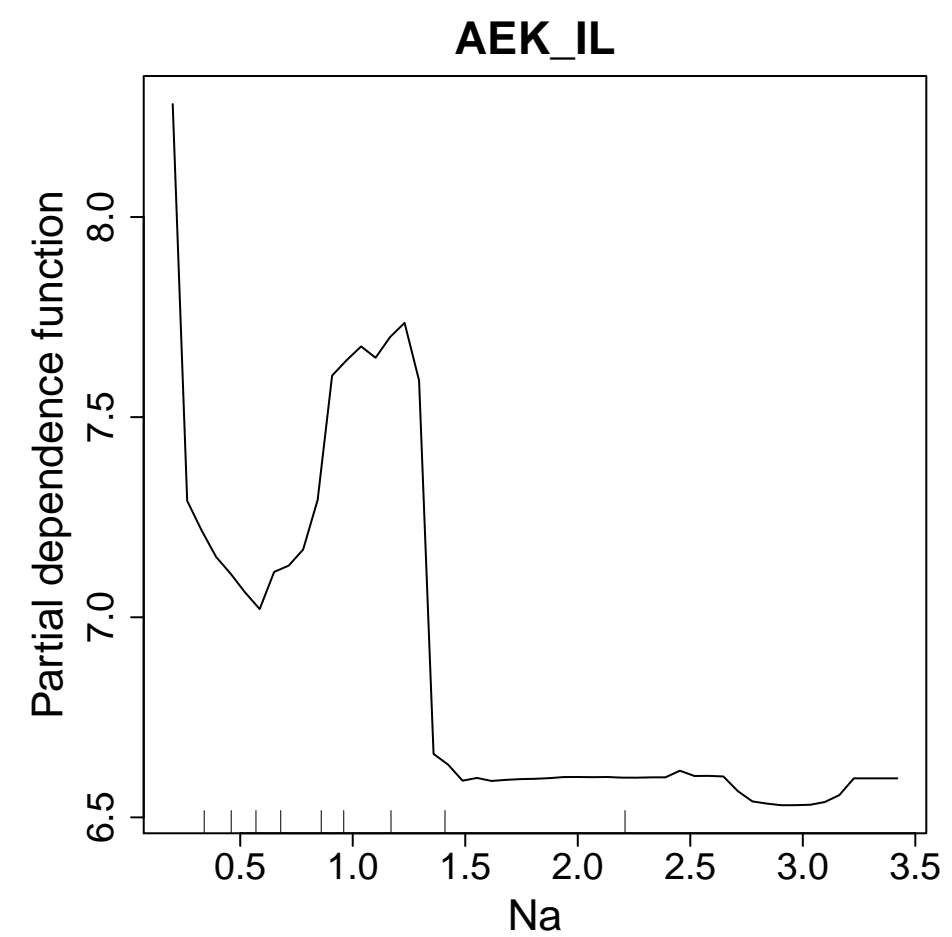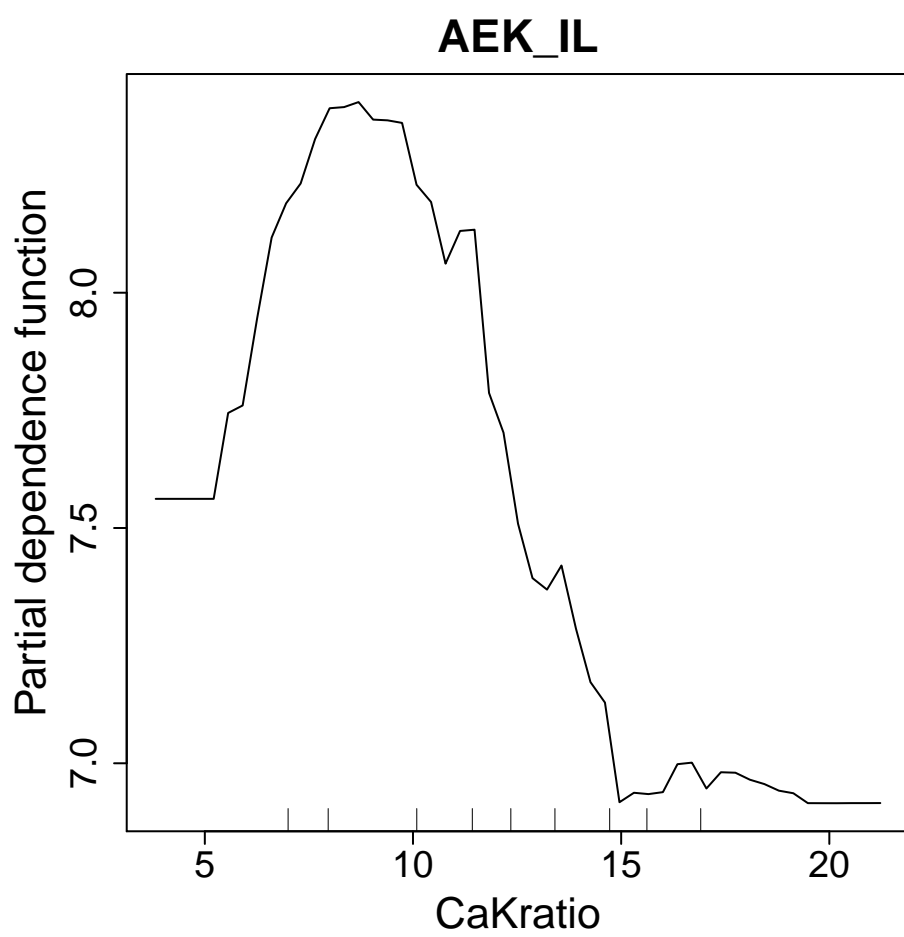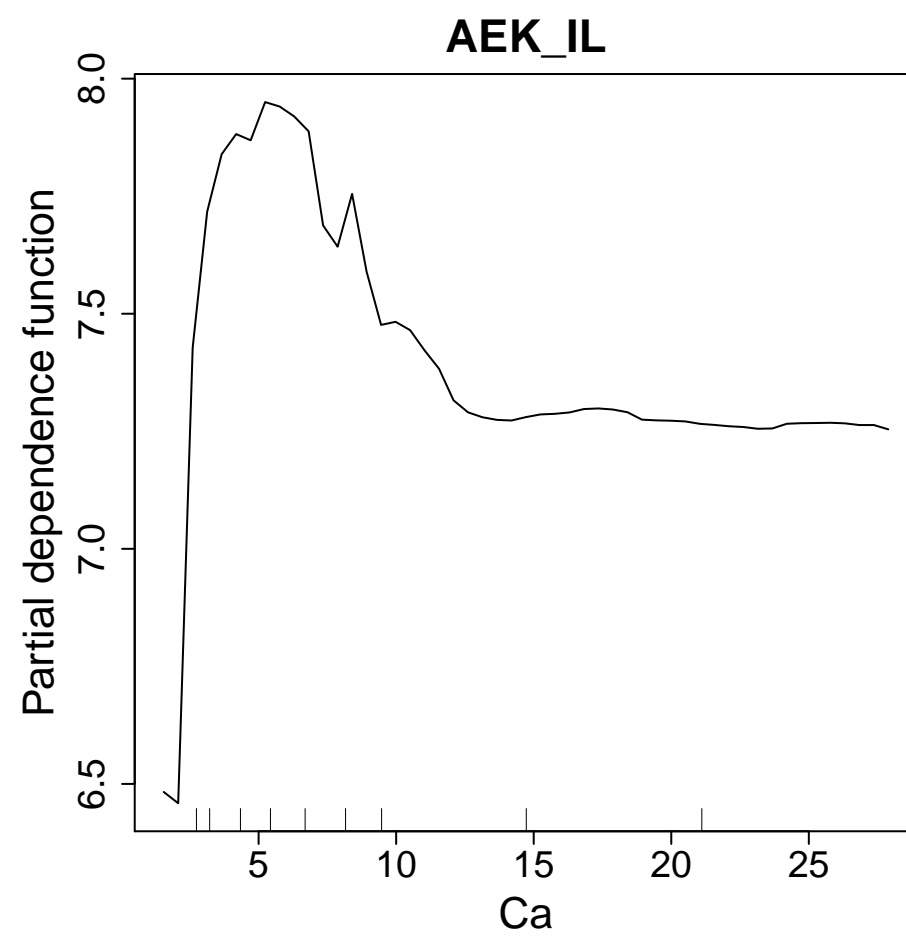

**AEK\_RL**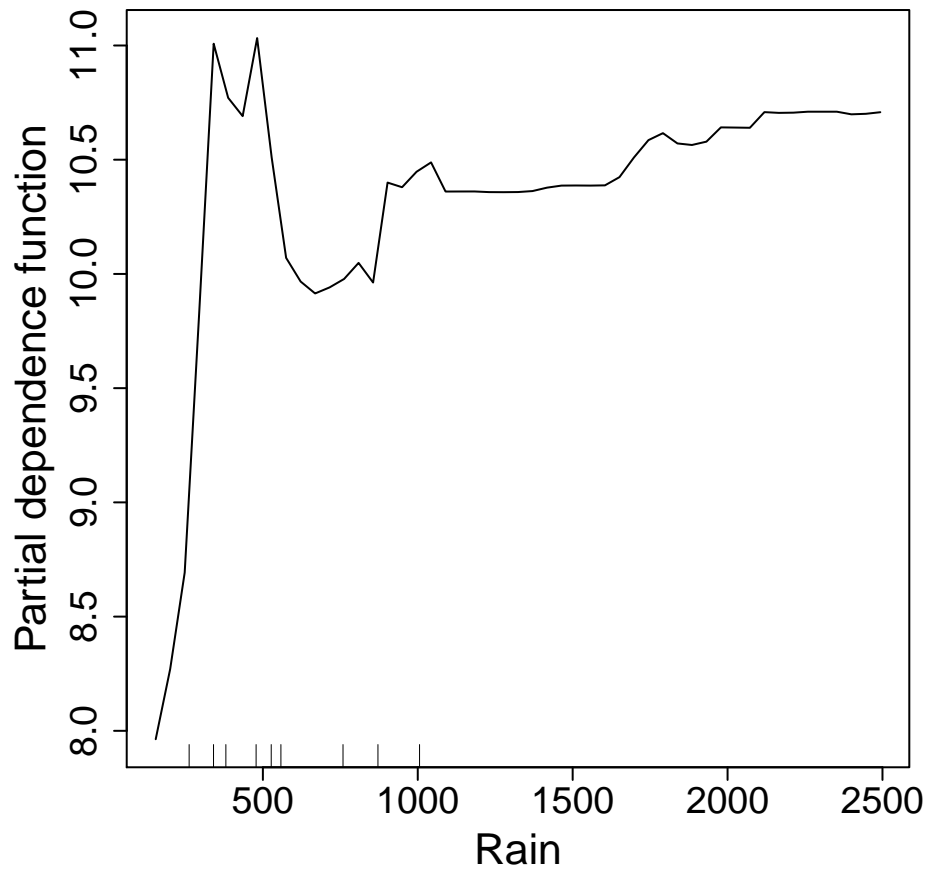**AEK\_RL**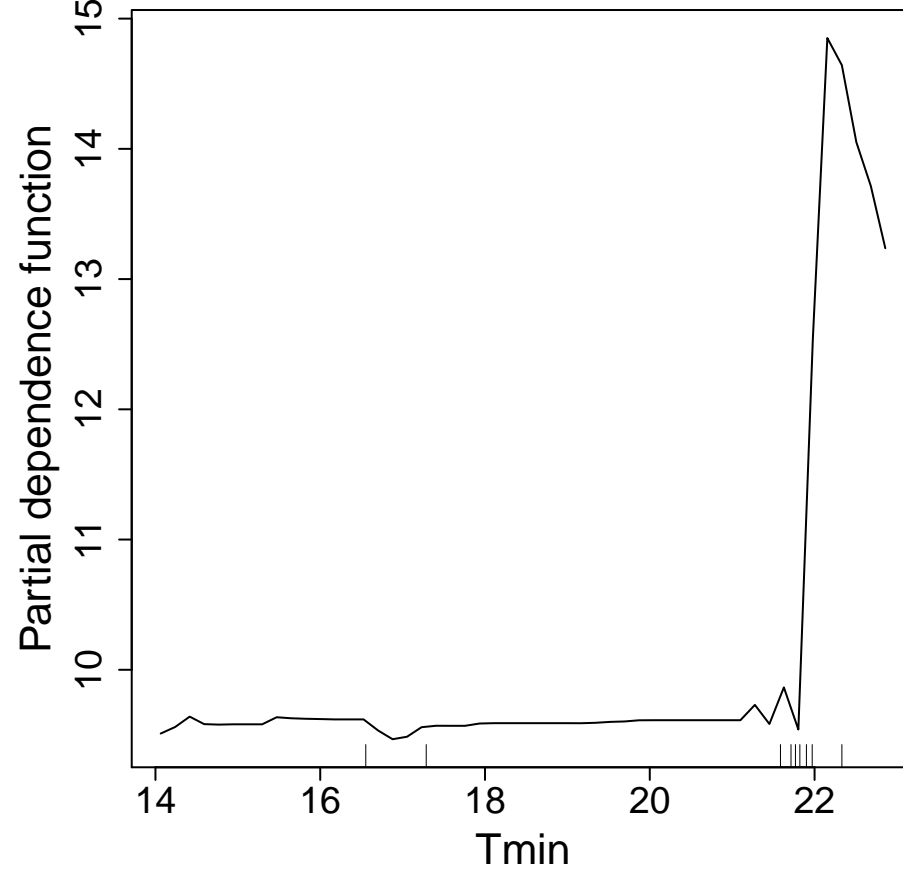**AEK\_RL**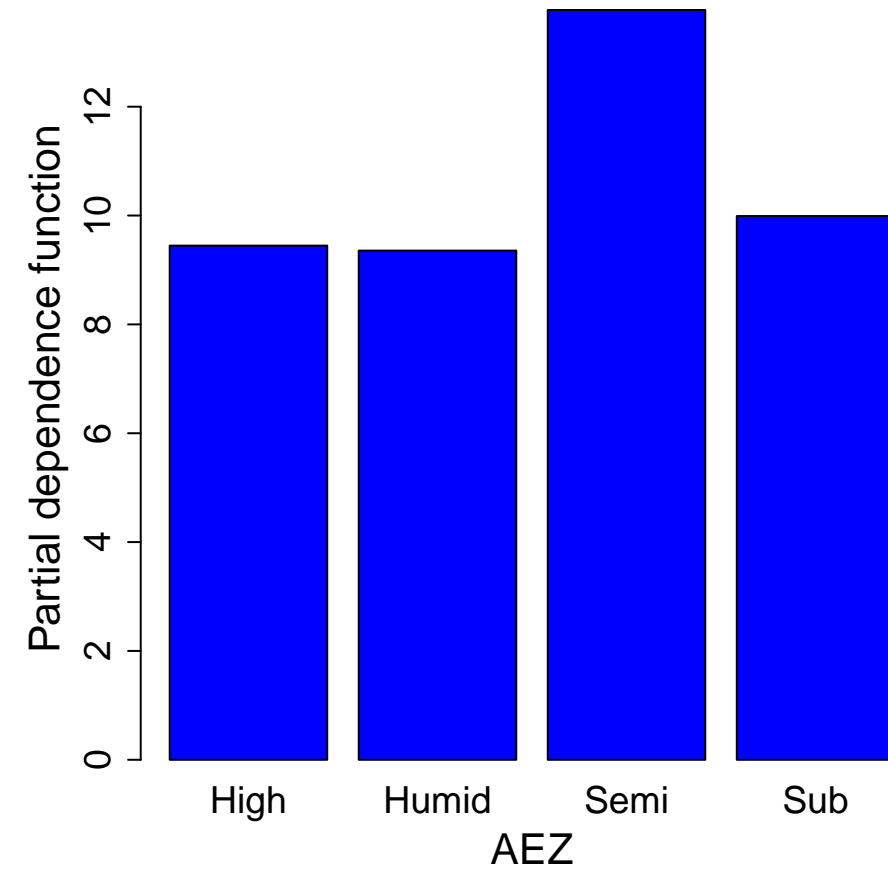**AEK\_RL**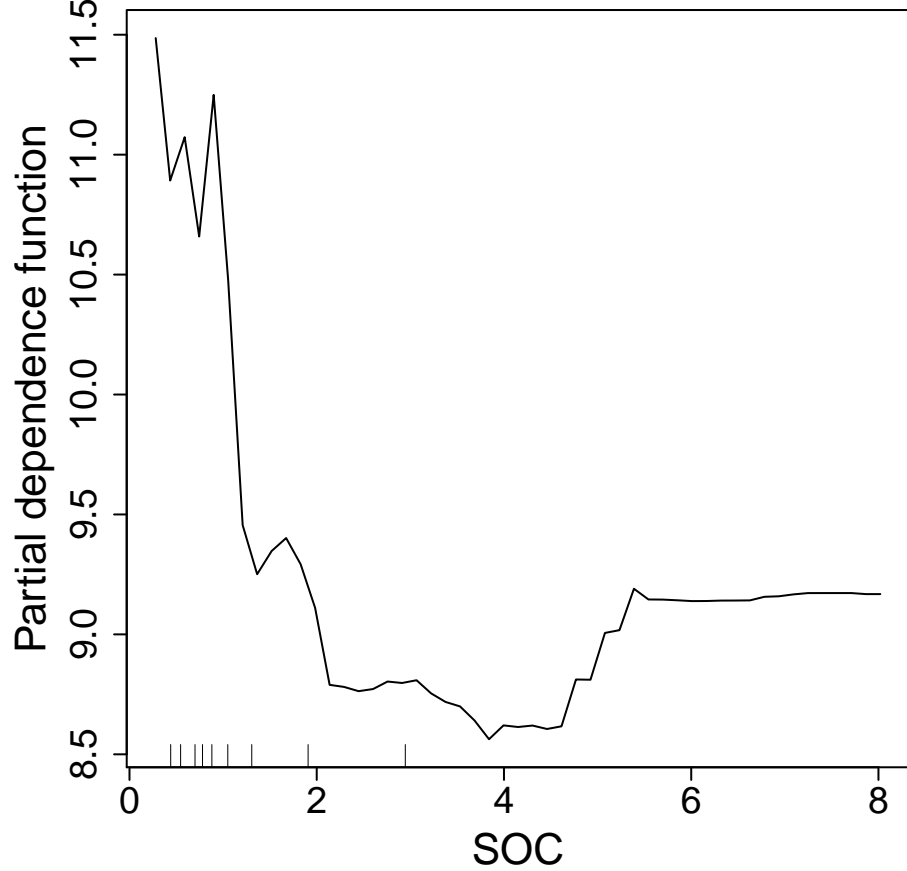**AEK\_RL**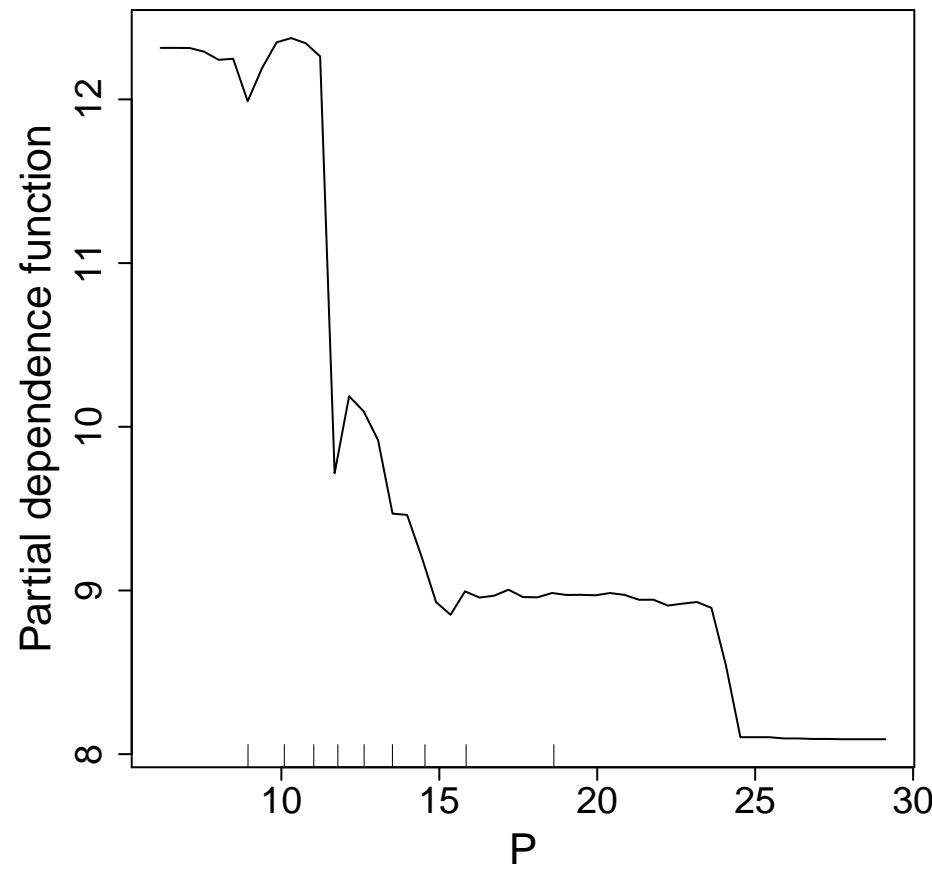

**AEK\_RU**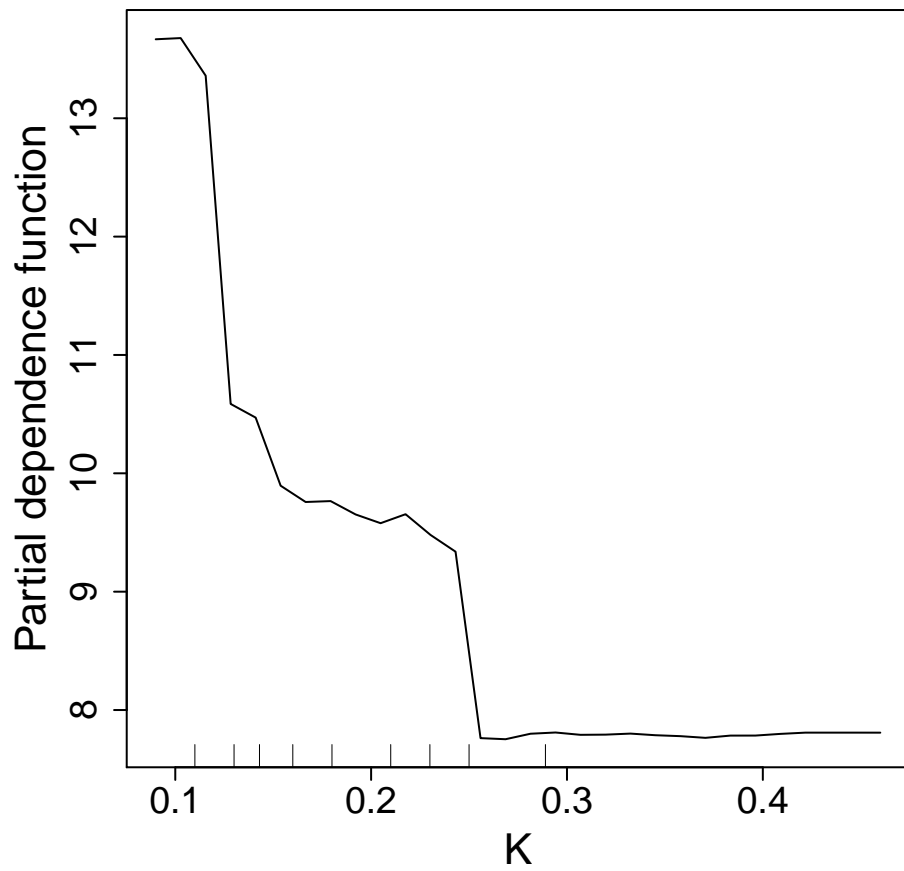**AEK\_RU**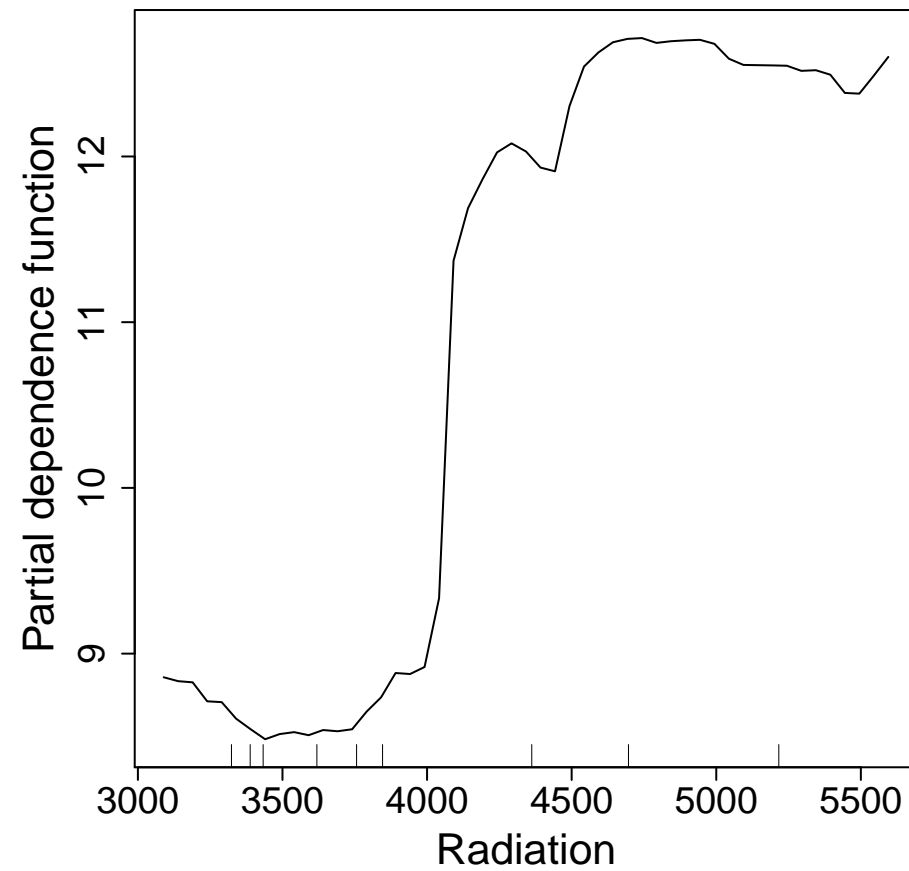**AEK\_RU**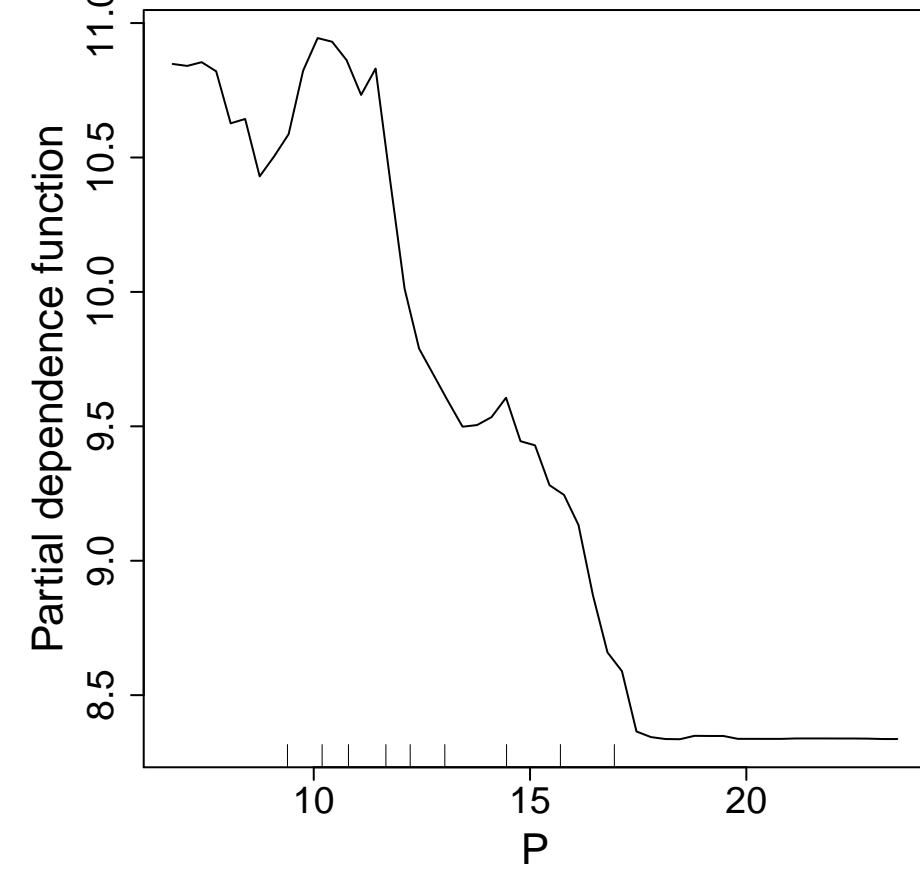**AEK\_RU**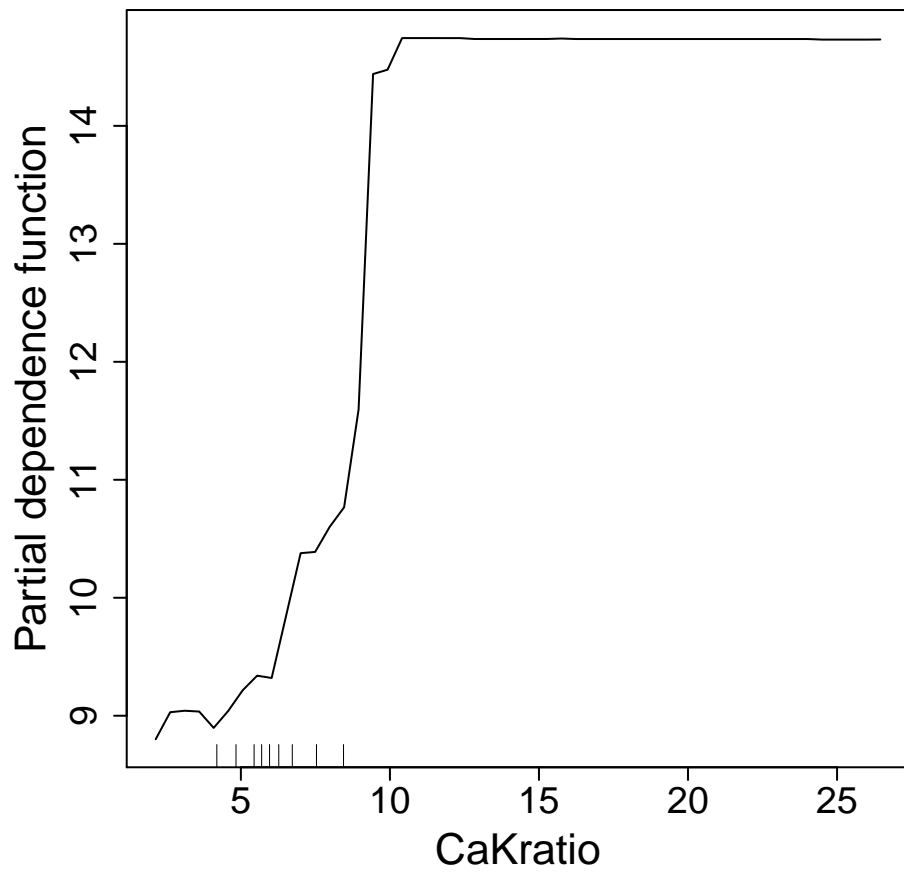**AEK\_RU**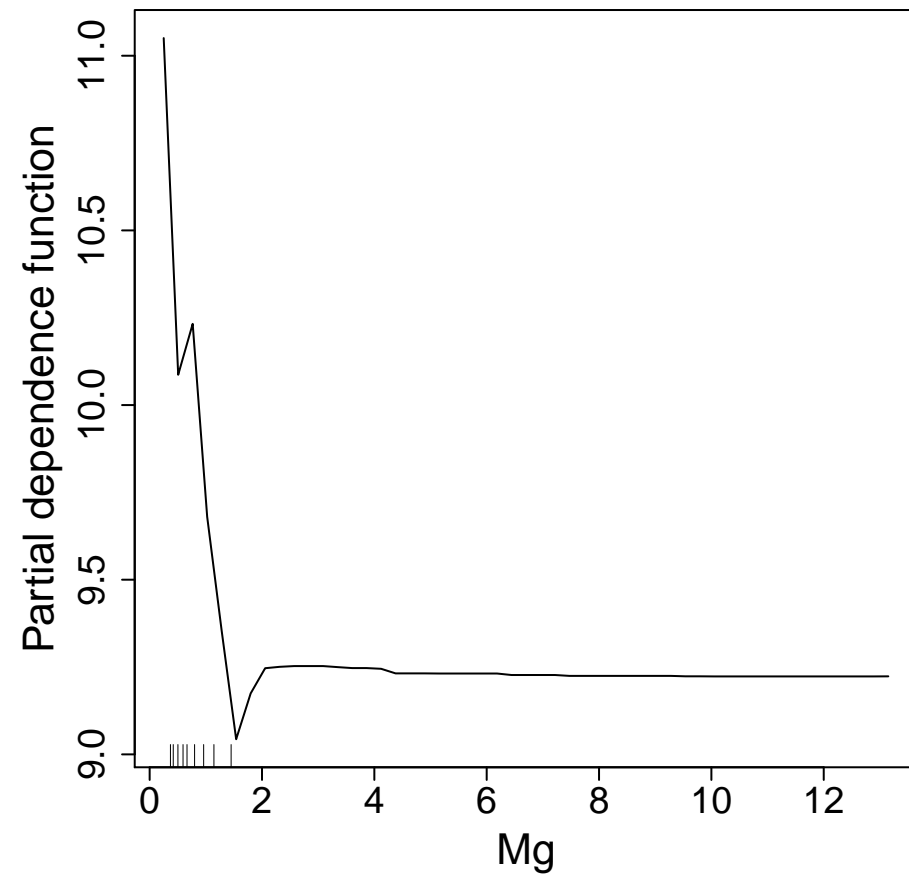

Supplement: MOESM5 [file 13593_2022_821_MOESM5_ESM.pdf]
