# Supplementary material for: Novel insights into factors associated with yield response and nutrient use efficiency of maize and rice in sub-Saharan Africa. A review
Source: Springer Nature journal article supplement (doi:10.1007/s13593-022-00821-4), 2022-08-22
Supplement: MOESM1 [file 13593_2022_821_MOESM1_ESM.pdf]

**Supplementary Figure S1: Partial factor productivity distribution**

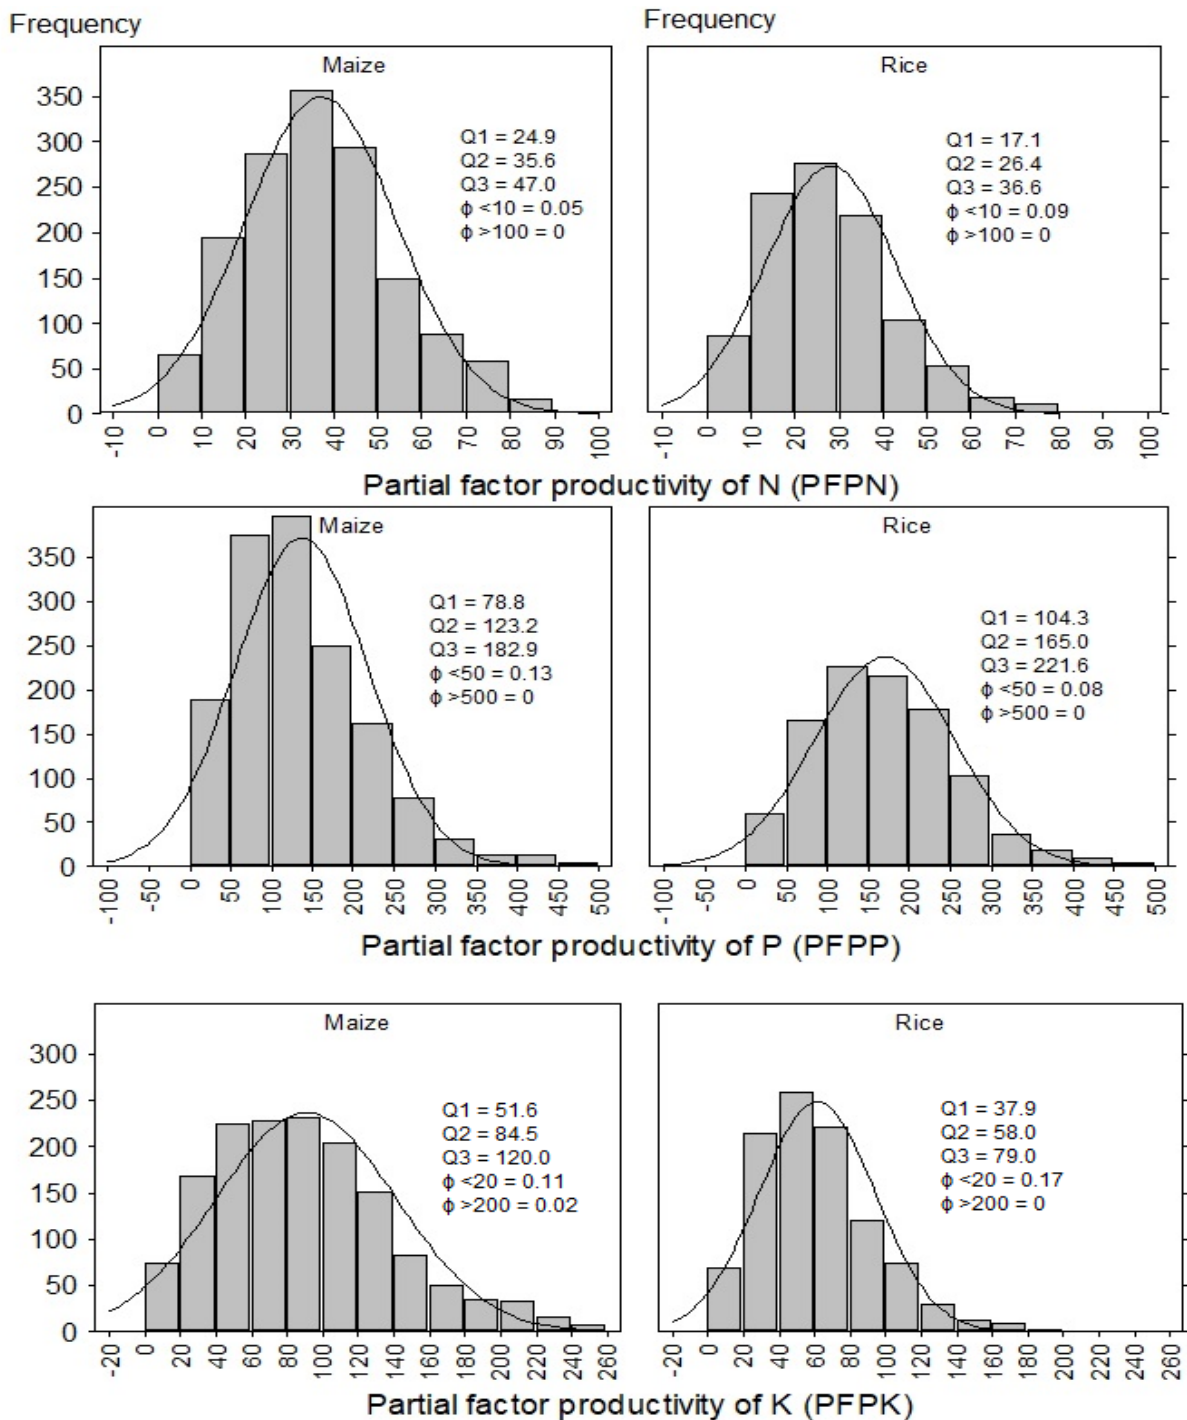

Figure S1. Comparison of the empirical distributions of partial factor productivity (kg grain kg<sup>-1</sup> nutrient) of N, P and K in maize (left panel) and rice (right panel). Smooth lines represent the normal probability distribution of each variable. Q1 is the first quartile, Q2 is the median, Q3 is third quartile,  $\phi$  is the probability of values falling below (<) or exceeding (>) a given level and CV is the coefficient of variation (%). For each variable, sample sizes were 1510 for maize and 1014 for rice.

## Supplementary Figure S2: Agronomic efficiency of N, P and K in maize and rice

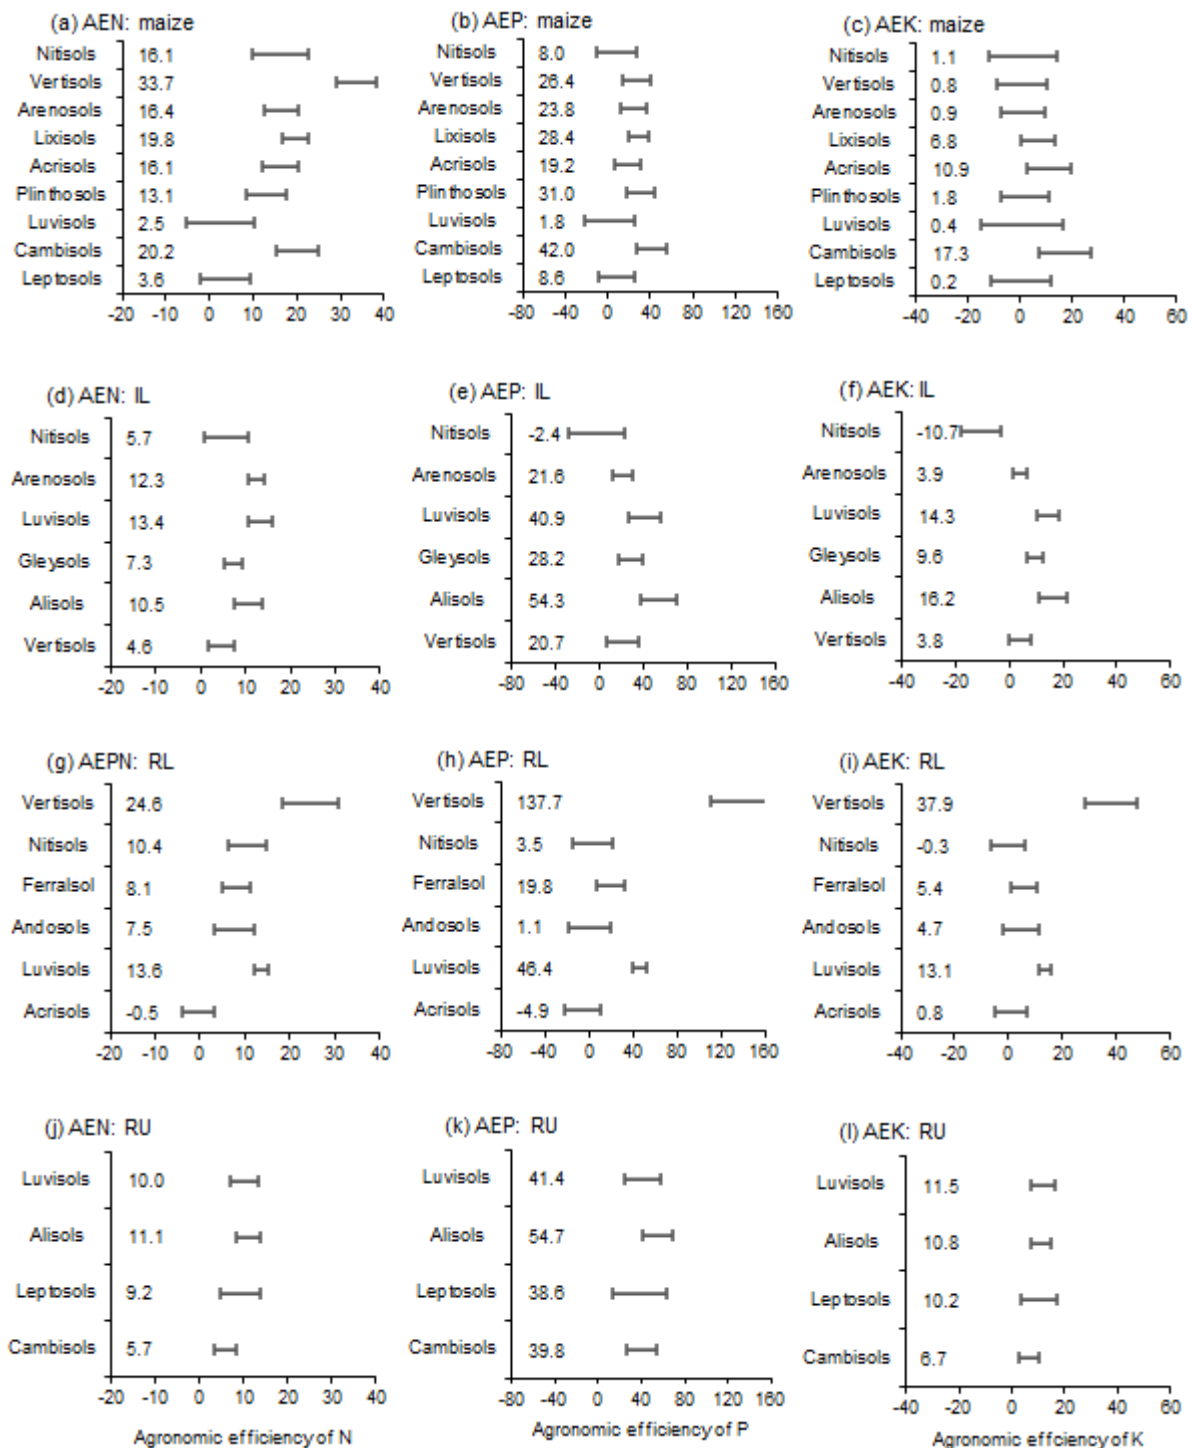

Figure S2. Variations in the agronomic efficiencies of N (AEN), P (AEP) and K (AEK) in maize and rice by soil type in irrigated lowland (IL), rainfed lowland (RL) and rainfed upland (RU). Horizontal bars represent the 95% confidence limits. Calculation of AE: response to AEN =  $(Y_{NPK} - Y_{PK})/Nrate$ ; AEP =  $(Y_{NPK} - Y_{NK})/Prate$ ; AEK =  $(Y_{NPK} - Y_{NP})/Krate$ .
