# Supplementary material for: Novel insights into factors associated with yield response and nutrient use efficiency of maize and rice in sub-Saharan Africa. A review
Source: Springer Nature journal article supplement (doi:10.1007/s13593-022-00821-4), 2022-08-22
Supplement: MOESM7 [file 13593_2022_821_MOESM7_ESM.pdf]

## Supplementary Tables

### Supplementary Table S1: List of peer-reviewed papers and NOTs

Table S1a. List of peer-reviewed papers used in the quantitative analysis

| Authors/Year            | Title                                                                                                                                                                                        |
|-------------------------|----------------------------------------------------------------------------------------------------------------------------------------------------------------------------------------------|
| Asai et al. 2021        | Application of a Bayesian approach to quantify the impact of nitrogen fertilizer on upland rice yield in sub-Saharan Africa                                                                  |
| Atnafu et al. 2021      | Effect of Nutrient Omission on Grain Yield and Yield Components of Maize ( <i>Zea mays</i> L.) at Kersa District, Jimma Zone, Southwestern Ethiopia                                          |
| Kenea et al. 2021       | Variability in yield responses, physiological use efficiencies and recovery fractions of fertilizer use in maize in Ethiopia                                                                 |
| Kihara et al. 2020      | Micronutrient deficiencies in African soils and the human nutritional nexus: opportunities with staple crops                                                                                 |
| Rurinda et al. 2020     | Science-based decision support for formulating crop fertilizer recommendations in sub-Saharan Africa                                                                                         |
| Andrade et al. 2019     | A spatial framework for ex-ante impact assessment of agricultural technologies                                                                                                               |
| Balemi et al. 2019      | Yield response and nutrient use efficiencies under different fertilizer applications in maize ( <i>Zea mays</i> L.) in contrasting agro ecosystems                                           |
| Njoroge et al. 2019     | Learning from the soil's memory: Tailoring of fertilizer application based on past manure applications increases fertilizer use efficiency and crop productivity on Kenyan smallholder farms |
| Saito et al. 2019       | Yield-limiting macronutrients for rice in sub-Saharan Africa                                                                                                                                 |
| Shehu et al. 2019       | Balanced nutrient requirements for maize in the Northern Nigerian Savanna: Parameterization and validation of QUEFTS model                                                                   |
| Kafesu et al. 2018      | Comparative fertilization effects on maize productivity under conservation and conventional tillage on sandy soils in a smallholder cropping system in Zimbabwe N                            |
| Niang et al. 2018       | Yield variation of rainfed rice as affected by field water availability and N fertilizer use in central Benin                                                                                |
| Otieno et al. 2018      | Effects of inorganic fertilizer application on grain yield, nutrient-use efficiency and economic returns of maize in Western Kenya                                                           |
| Shehu et al. 2018       | Quantifying variability in maize yield response to nutrient applications in the Northern Nigerian Savanna                                                                                    |
| Njoroge et al. 2017     | Strong spatial-temporal patterns in maize yield response to nutrient additions in African smallholder farms                                                                                  |
| Kihara et al. 2016      | Understanding variability in crop response to fertilizer and amendments in sub-Saharan Africa                                                                                                |
| Kihara et al. 2016      | Maize response to macronutrients and potential for profitability in sub-Saharan Africa                                                                                                       |
| Kihara et al. 2016      | Analysis of Crop Nutrient Response Patterns to Guide Site-Specific Fertilizer Recommendations                                                                                                |
| Kurwakumire et al. 2014 | Maize productivity and nutrient and water use efficiencies across soil fertility domains on smallholder farms in Zimbabwe                                                                    |
| Kihara et al. 2013      | Phosphorus agronomic efficiency in maize-based cropping systems: a focus on western Kenya                                                                                                    |
| Kaizzi et al. 2012      | Maize Response to Fertilizer and Nitrogen Use Efficiency in Uganda                                                                                                                           |
| Nziguheba et al. 2009   | Assessment of nutrient deficiencies in maize in nutrient omission trials and long-term field experiments in the West African Savanna                                                         |
| Tittonell et al. 2008   | Yield gaps, nutrient use efficiencies and response to fertilisers by maize across heterogeneous smallholder farms of western Kenya                                                           |

Table S1b. List of maize and rice nutrient omission trials (NOTS) available for combined analysis

| Crop  | Project | Country  | Site Name  | No of seasons | Status                  | Publication Name      |
|-------|---------|----------|------------|---------------|-------------------------|-----------------------|
| Maize | AfSIS   | Malawi   | Kasungu    | 1             | Published               | Kihara et al (2016)   |
|       | AfSIS   | Malawi   | Nkhata Bay | 2             | Published               | Kihara et al (2017)   |
|       | AfSIS   | Malawi   | Thuchila   | 1             | Published               | Kihara et al (2018)   |
|       | AfSIS   | Tanzania | Mbinga     | 1             | Published               | Kihara et al (2019)   |
|       | AfSIS   | Tanzania | Kiberashi  | 1             | Published               | Kihara et al (2020)   |
|       | AfSIS   | Nigeria  | Pampaida   | 1             | Published               | Kihara et al (2021)   |
|       | IPNI    | Kenya    | Sidindi    | 7             | Published               | Njoroge et al (2017)  |
|       | IPNI    | Kenya    | Embu       | 1             | Unpublished             | --                    |
|       | IITA    | Kenya    | W. Kenya   | 1             | Published               | Vanlauwe et al (2006) |
|       | Tamasa  | Nigeria  | Various    | 2             | Published               | Rurinda et al (2020)  |
|       | Tamasa  | Ethiopia | Various    | 2             | Published               | Rurinda et al (2021)  |
|       | Tamasa  | Tanzania | Various    | 1             | Published               | Rurinda et al (2022)  |
|       | ??      | Zimbabwe | Murewa     |               | Published               | Kafesu et al. (2018)  |
| ??    | Togo    |          |            | Published     | Nziguheba et al. (2008) |                       |
| Rice  |         |          |            |               |                         | Saito et al. (2019)   |

## Supplementary Table S2: Soils data from maize NOTs

Table S2. Soil type and median values of soil tests for maize nutrient omission trials were conducted

| Site name | Soil type            | pH  | SOC (%) | Total N (%) | Available P (mg/kg) | Exchangeable (cmol/kg) |      |       | SSI (%) |
|-----------|----------------------|-----|---------|-------------|---------------------|------------------------|------|-------|---------|
|           |                      |     |         |             |                     | K                      | Ca   | Mg    |         |
| Adamitulu | Andosols             | 7.2 | 0.80    | NA          | NA                  | NA                     | NA   | NA    | NA      |
| Affem     | Acrisols             | 5.9 | 0.86    | 0.06        | NA                  | NA                     | NA   | NA    | 7.9     |
| Aludeka   | Acrisols             | NA  | 0.73    | 0.66        | NA                  | NA                     | NA   | NA    | NA      |
| Bako      | Nitisols             | 5.4 | 2.60    | 0.25        | 3.9                 | 1.10                   | 8.69 | 3.70  | 5.9     |
| Bakori    | Arenosols            | 6.1 | 0.81    | 0.04        | 4.65                | 0.27                   | 2.84 | 0.83  | 3.2     |
| Bulbula   | Andosols             | 7.2 | 0.70    | NA          | NA                  | NA                     | NA   | NA    | NA      |
| Bunkure   | Lixisols/Plinthosols | 6.3 | 0.59    | 0.03        | 4.8                 | 0.20                   | 1.61 | 0.44  | 3.6     |
| Dandume   | Arenosols/Lixisols   | 5.8 | 0.83    | 0.05        | 4.6                 | 0.18                   | 2.22 | 0.525 | 3.0     |
| Doguwa    | Lixisols/Plinthosols | 6.1 | 1.18    | 0.06        | 3.1                 | 0.21                   | 3.89 | 0.89  | 3.5     |
| Embu      | Nitisols             | 5.8 | 2.80    | NA          | 16.9                | 1.00                   | 2.50 | 7.9   | 6.3     |
| Emuhaya   | Ferralsols           | NA  | 1.28    | 1.17        | 6.025               | NA                     | NA   | NA    | NA      |
| Faskari   | Arenosols/Lixisols   | NA  | NA      | NA          | NA                  | NA                     | NA   | NA    | NA      |
| Funtua    | Arenosols/Lixisols   | 6.0 | 0.88    | 0.04        | 3.9                 | 0.15                   | 3.10 | 0.70  | 3.1     |
| Giwa      | Lixisols             | NA  | NA      | NA          | NA                  | NA                     | NA   | NA    | NA      |
| Hawasa    | Luvisols             | NA  | NA      | NA          | NA                  | NA                     | NA   | NA    | NA      |
| Ikara     | Lixisols             | 5.8 | 0.79    | 0.04        | 5.8                 | 0.24                   | 1.98 | 0.41  | 3.3     |
| Jimma     | Vertisols            | 5.4 | 2.01    | 0.21        | 5.7                 | 0.94                   | 7.30 | 3.0   | 4.9     |
| Kand      | Nitisols             | 5.6 | 3.38    | NA          | 16.7                | NA                     | NA   | NA    | 8.6     |
| Kasungu   | Lixisols             | 6.4 | NA      | 0.05        | 67.6                | 0.41                   | 4.14 | 1.13  | NA      |
| Kauru     | Lixisols             | NA  | NA      | NA          | NA                  | NA                     | NA   | NA    | NA      |
| Kiberash  | Luvisols             | 6.1 | NA      | 0.18        | 9.69                | 0.60                   | 4.21 | 1.76  |         |
| Lere      | Lixisols             | 5.8 | 0.61    | 0.04        | 3.29                | 0.18                   | 1.50 | 0.415 | 2.4     |
| Makarfi   | Lixisols             | 5.5 | 0.91    | 0.05        | 3.29                | 0.14                   | 1.85 | 0.69  | 2.9     |
| Mbinga    | Acrisols             | 5.6 | NA      | 0.11        | 9.64                | 0.29                   | 2.77 | 1.35  |         |
| Murewa    | Cambisols            | 6.1 | 0.76    | 0.08        | 31.0                | 0.16                   | 2.40 | 0.61  | NA      |
| NkhataBay | Leptosols            | 5.4 | NA      | 0.08        | 22.1                | 0.35                   | 2.15 | 1.04  |         |
| Pampida   | Lixisols             | NA  | 2.33    | NA          | NA                  | NA                     | NA   | NA    | 11.7    |
| Sessaro   | Acrisols             | 6.3 | 0.81    | 0.06        | NA                  | NA                     | NA   | NA    | 6.8     |
| Shinyalu  | Nitisols             | NA  | 1.75    | 1.56        | 5.41                | NA                     | NA   | NA    | NA      |
| Siaya     | Acrisols             | 5.6 | 1.60    | NA          | 10                  | 0.23                   | 1.16 | 3.68  | 3.7     |
| Sidini    | Acrisols             | NA  | 3.03    | NA          | NA                  | NA                     | NA   | NA    | NA      |
| Soba      | Lixisols             | 6.0 | 1.02    | 0.05        | 3.595               | 0.16                   | 2.45 | 0.62  | 3.7     |
| Thuchila  | Nitisols             | 5.6 | NA      | 0.16        | 28.1                | 0.62                   | 4.31 | 1.46  |         |
| Tofa      | Lixisols             | NA  | NA      | NA          | NA                  | NA                     | NA   | NA    | NA      |
| TudunWad  | Lixisols             | 6.2 | 0.69    | 0.04        | 6.56                | 0.21                   | 2.81 | 0.51  | 3.5     |

Green = values above critical value; Red = sites without the relevant data

## Supplementary Table S3: Soils data from rice NOTs

Table S3. Soil type and median values of soil tests for sites where rice nutrient omission trials were conducted

| Site name     | Soil type  | System | pH  | SOC (%) | Total N (%) | Available P (mg/kg) | Exchangeable cations (cmol/kg) |      |      | SSI |
|---------------|------------|--------|-----|---------|-------------|---------------------|--------------------------------|------|------|-----|
|               |            |        |     |         |             |                     | K                              | Ca   | Mg   |     |
| Affe          | Gleysols   | IL     | 6.0 | 1.8     | 0.2         | 15.8                | 0.7                            | 21.0 | 12.1 | 4.9 |
| Ambohinary    | Ferralsols | RL     | 5.2 | 2.7     | 0.3         | 9.4                 | 0.4                            | 3.9  | 1.8  | 6.6 |
| Ankazomiriotr | Leptosols  | RU     | 5.4 | 1.7     | 0.2         | 9.1                 | 0.2                            | 1.7  | 0.8  | 7.6 |
| Bo&Kenema     | Ferralsols | RL     | 5.1 | 1.7     | 0.2         | 13.7                | 0.2                            | 1.3  | 0.3  | 7.9 |
| CentralRiver  | Gleysols   | IL     | 6.0 | 1.2     | 0.1         | 9.3                 | 0.3                            | 8.5  | 3.6  | 3.4 |

|                |                   |       |     |     |     |      |     |      |     |      |
|----------------|-------------------|-------|-----|-----|-----|------|-----|------|-----|------|
| Eastern Uganda | Vertisols         | IL    | 6.1 | 3.8 | 0.4 | 24.0 | 0.5 | 15.5 | 5.4 | 11.2 |
| Fogera         | Vertisols         | RL    | NA  | NA  | NA  | NA   | NA  | NA   | NA  | NA   |
| Gagnoa         | Alisols           | IL    | 5.4 | 1.2 | 0.1 | 12.1 | 0.2 | 3.2  | 1.0 | 7.7  |
| Glazoue        | Luvisols          | RL/RU | 5.7 | 0.7 | 0.1 | 13.3 | 0.2 | 3.4  | 1.0 | 4.5  |
| HauteGuinee    | Alisols           | RU    | 5.5 | 0.9 | 0.1 | 12.8 | 0.2 | 2.0  | 0.7 | 5.1  |
| Hauts-bassins  | Luvisols          | IL    | 5.8 | 0.7 | 0.1 | 9.5  | 0.2 | 3.2  | 1.1 | 2.9  |
| Kahama         | Ferralsols        | RL    | 5.7 | 0.7 | 0.1 | 10.6 | 0.2 | 4.1  | 1.5 | 3.3  |
| Kara           | Luvisols          | RL    | NA  | NA  | NA  | NA   | NA  | NA   | NA  | NA   |
| Kouroumari     | Vertisols         | IL    | 6.9 | 0.3 | 0.0 | 4.8  | 0.2 | 4.7  | 2.2 | 1.3  |
| Kumasi         | Acrisols          | RL    | 6.0 | 1.2 | 0.1 | 13.2 | 0.2 | 4.7  | 1.6 | 5.4  |
| Lagdo          | Luvisols          | RL    | 5.9 | 0.8 | 0.1 | 11.2 | 0.3 | 3.2  | 0.9 | 3.3  |
| Malanville     | Arenosols         | IL    | 5.8 | 0.8 | 0.1 | 9.5  | 0.2 | 4.2  | 2.1 | 3.2  |
| Man            | Cambisols         | RU    | 5.3 | 1.7 | 0.1 | 12.4 | 0.2 | 2.4  | 0.9 | 8.8  |
| Nasarawa       | Luvisols          | RL/RU | 5.2 | 1.3 | 0.1 | 13.3 | 0.2 | 1.8  | 0.5 | 7.0  |
| Navrongo       | Luvisols          | IL/RU | 5.5 | 0.6 | 0.1 | 12.8 | 0.2 | 2.6  | 0.6 | 4.8  |
| Ndop           | Andosols/Nitisols | IL/RL | 4.9 | 3.5 | 0.3 | 14.3 | 0.3 | 3.0  | 1.2 | 9.0  |
| Ouinhi         | Gleysols          | RL    | NA  | NA  | NA  | NA   | NA  | NA   | NA  | NA   |
| RegionMaritim  | Luvisols          | IL    | 6.1 | 0.9 | 0.1 | 9.7  | 0.5 | 8.9  | 5.2 | 3.4  |
| RegionPlateau  | Luvisols          | RL    | 5.2 | 0.7 | 0.1 | 17.5 | 0.2 | 1.6  | 0.6 | 6.3  |
| Rugeramigozi   | Acrisols          | IL    | NA  | NA  | NA  | NA   | NA  | NA   | NA  | NA   |
| Rwasave        | Ferralsols        | IL    | NA  | NA  | NA  | NA   | NA  | NA   | NA  | NA   |
| Savelugu       | Luvisols          | RL    | 5.7 | 0.5 | 0.1 | 15.1 | 0.2 | 1.7  | 0.5 | 2.6  |
| Sikasso        | Luvisols          | RL/RU | 5.4 | 0.6 | 0.0 | 9.2  | 0.1 | 2.1  | 0.7 | 2.7  |
| Tandjile-Est   | Vertisols         | RL    | 5.9 | 0.4 | 0.0 | 10.4 | 0.2 | 2.1  | 0.6 | 3.9  |
| Tillabery      | Arenosols         | IL    | 5.9 | 0.7 | 0.1 | 7.3  | 0.2 | 6.5  | 2.8 | 2.5  |
| Tormabum       | Fluvisols         | RL    | NA  | NA  | NA  | NA   | NA  | NA   | NA  | NA   |

Green = values above critical value; Red = sites without the relevant data

## Supplementary Table S4: Variance partitioning

Table S4. Variance explained (%) by the main variables

| Crop  | Sources of variation       | Explained variance (%) |            |            |
|-------|----------------------------|------------------------|------------|------------|
|       |                            | N response             | P response | K response |
| Maize | Soil type                  | 17.9                   | 5.4        | 2.3        |
|       | AEZ                        | 1.3                    | 0.2        | 0.5        |
|       | Variety                    | 3.3                    | 1.9        | 0.1        |
|       | Error                      | 77.5                   | 92.5       | 97.1       |
| Rice  | Soil type                  | 6.5                    | 4.6        | 6.2        |
|       | AEZ                        | 3.0                    | 2.9        | 3.0        |
|       | Production system          | 0.8                    | 0.1        | 0.4        |
|       | Variety                    | 0.5                    | 1.3        | 0.2        |
|       | Nutrient rate <sup>‡</sup> | 0.1                    | 0.9        | 0.0        |
|       | Error                      | 89.2                   | 90.2       | 90.1       |

<sup>‡</sup> In maize nutrient rate was aliased with other terms in the model

## Supplementary Table S5: Random forests model evaluation

Table S5. Model fit criteria for judging predictions from the random forests with measured values

| Crop  | Cropping system   | Variable | R <sup>2</sup> | RPD  | Bias   | RMSE  | %RMSE |
|-------|-------------------|----------|----------------|------|--------|-------|-------|
| Maize | Rainfed           | Yield    | 0.641          | 1.67 | 0.008  | 1.52  | 37.1  |
|       |                   | YRN      | 0.282          | 1.18 | 0.008  | 1.81  | 82.5  |
|       |                   | YRP      | 0.164          | 1.09 | 0.004  | 1.75  | 87.7  |
|       |                   | YRK      | -0.085         | 0.96 | 0.000  | 1.58  | 789.5 |
|       |                   | AEN      | 0.246          | 1.15 | 0.054  | 14.80 | 84.1  |
|       |                   | AEP      | 0.103          | 1.06 | 0.196  | 43.60 | 178.0 |
|       |                   | AEK      | -0.090         | 0.96 | 0.185  | 33.80 | 637.7 |
| Rice  | Irrigated lowland | Yield    | 0.549          | 1.49 | 0.035  | 1.55  | 30.9  |
|       |                   | YRN      | 0.229          | 1.14 | -0.012 | 1.24  | 68.9  |
|       |                   | YRP      | 0.029          | 1.02 | -0.014 | 1.07  | 133.9 |
|       |                   | YRK      | 0.169          | 1.10 | -0.006 | 0.95  | 159.0 |
|       |                   | AEN      | 0.231          | 1.14 | -0.097 | 6.56  | 67.6  |
|       |                   | AEP      | 0.073          | 1.04 | -0.755 | 37.28 | 132.7 |
|       |                   | AEK      | 0.232          | 1.14 | 0.075  | 10.70 | 144.6 |
|       | Rainfed lowland   | Yield    | 0.311          | 1.21 | 0.028  | 1.70  | 41.4  |
|       |                   | YRN      | 0.332          | 1.23 | 0.014  | 1.11  | 79.5  |
|       |                   | YRP      | 0.254          | 1.16 | -0.002 | 0.95  | 136.1 |
|       |                   | YRK      | 0.132          | 1.07 | 0.013  | 0.88  | 145.9 |
|       |                   | AEN      | 0.410          | 1.30 | 0.030  | 8.55  | 75.7  |
|       |                   | AEP      | 0.313          | 1.21 | -0.324 | 42.96 | 122.7 |
|       |                   | AEK      | 0.207          | 1.12 | 0.210  | 15.04 | 147.5 |
|       | Rainfed upland    | Yield    | 0.497          | 1.41 | 0.078  | 1.21  | 35.5  |
|       |                   | YRN      | 0.182          | 1.11 | 0.031  | 1.00  | 100.3 |
|       |                   | YRP      | 0.166          | 1.10 | 0.033  | 0.91  | 101.0 |
|       |                   | YRK      | -0.001         | 1.00 | 0.021  | 0.68  | 136.9 |
|       |                   | AEN      | 0.198          | 1.12 | 0.149  | 8.36  | 95.0  |
|       |                   | AEP      | 0.150          | 1.09 | 1.004  | 44.50 | 98.9  |
|       |                   | AEK      | 0.010          | 1.01 | 0.480  | 12.80 | 134.7 |
