# Supplementary figures and images for: Novel insights into factors associated with yield response and nutrient use efficiency of maize and rice in sub-Saharan Africa. A review
Source: Springer Nature journal article supplement (doi:10.1007/s13593-022-00821-4), 2022-08-22

**Yield**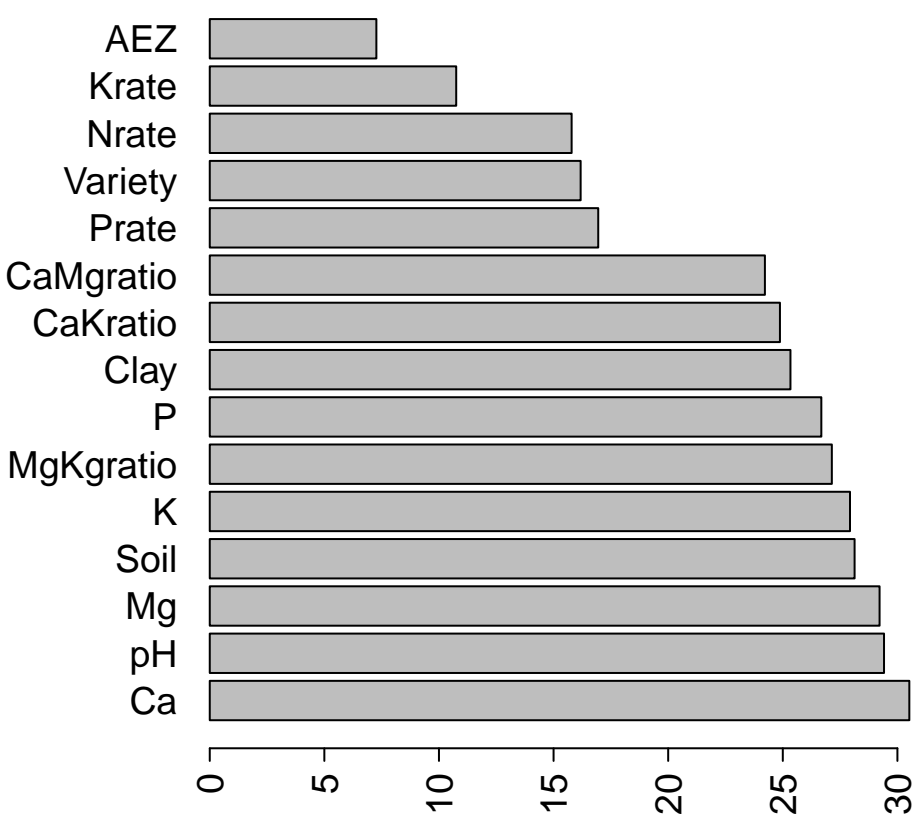**YRN**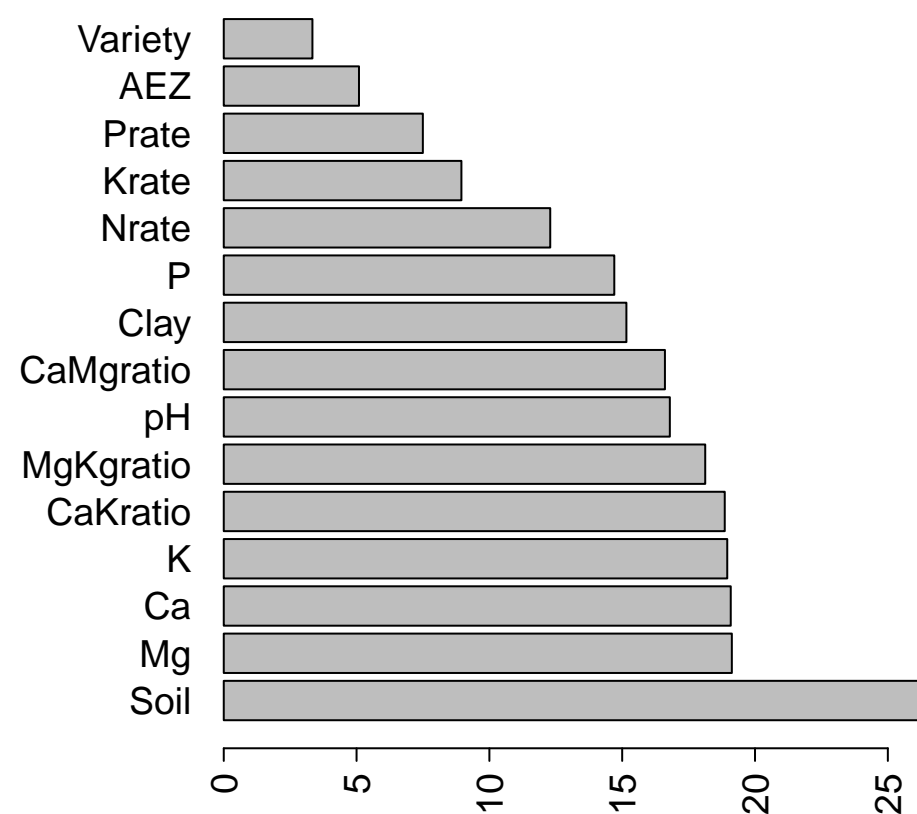**YRP**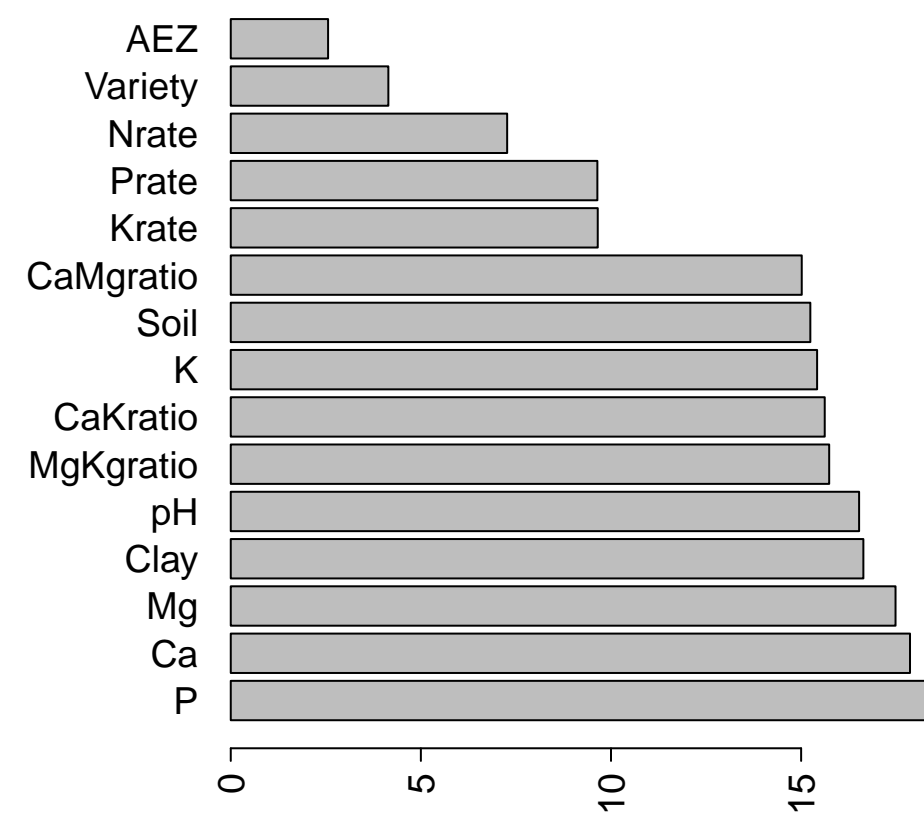**YRK**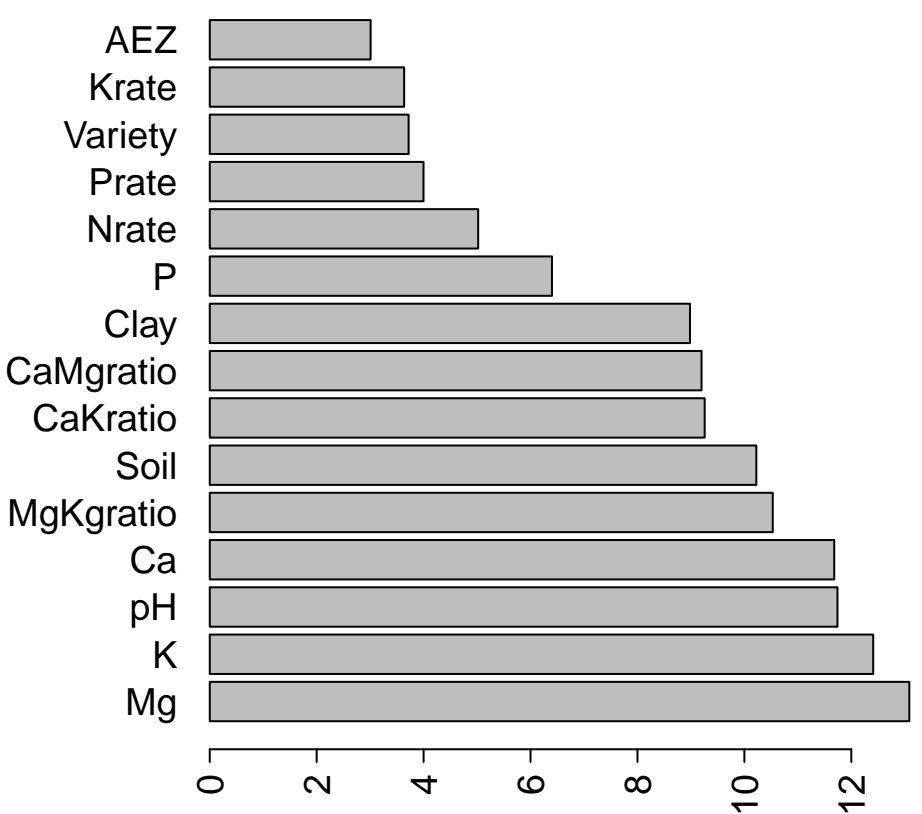**AEN**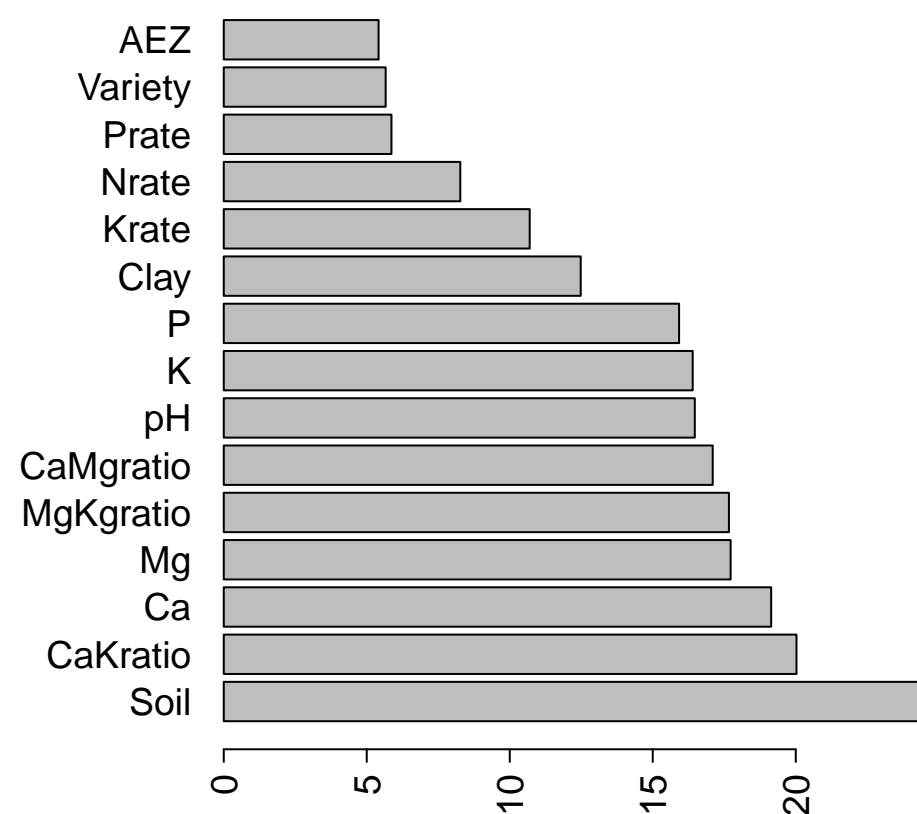**AEP**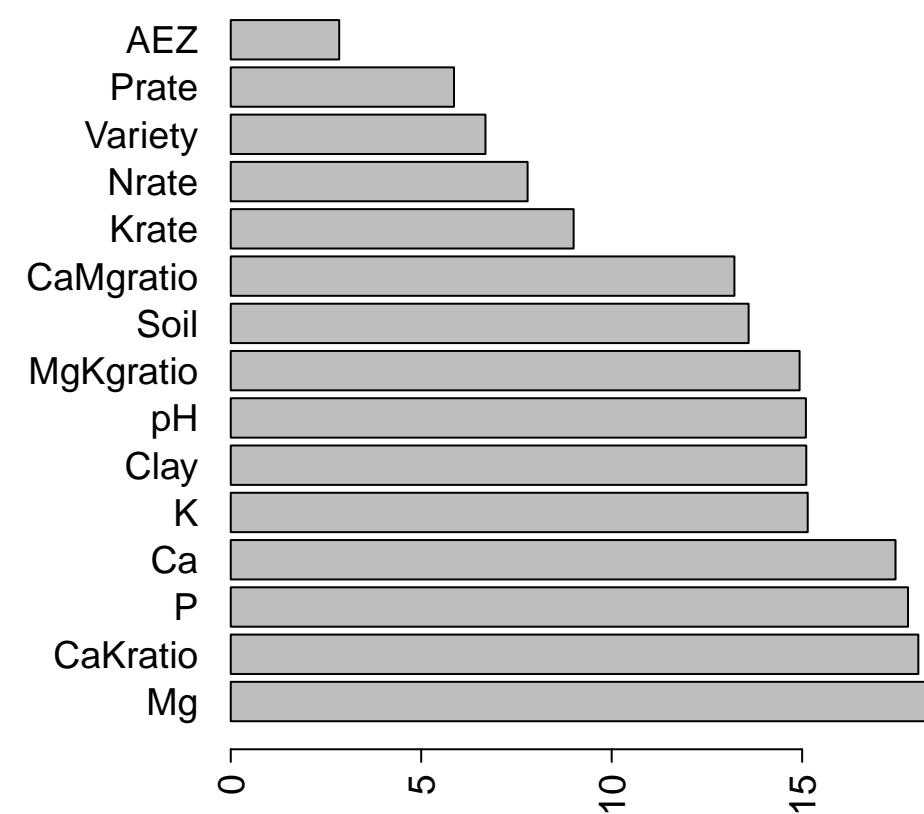**AEK**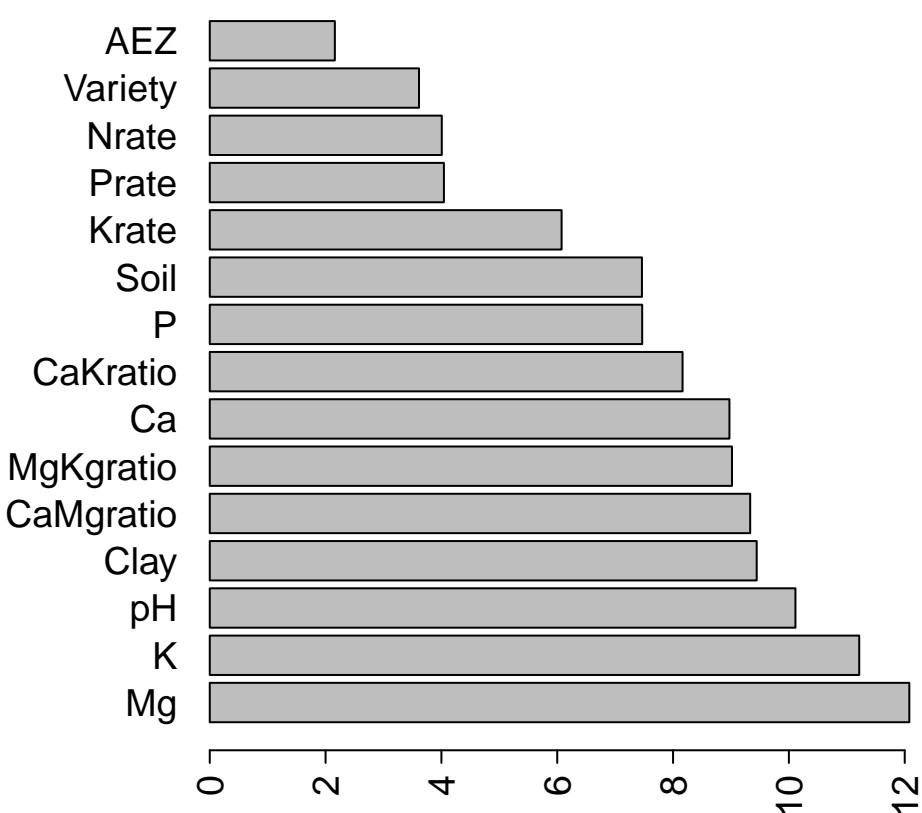

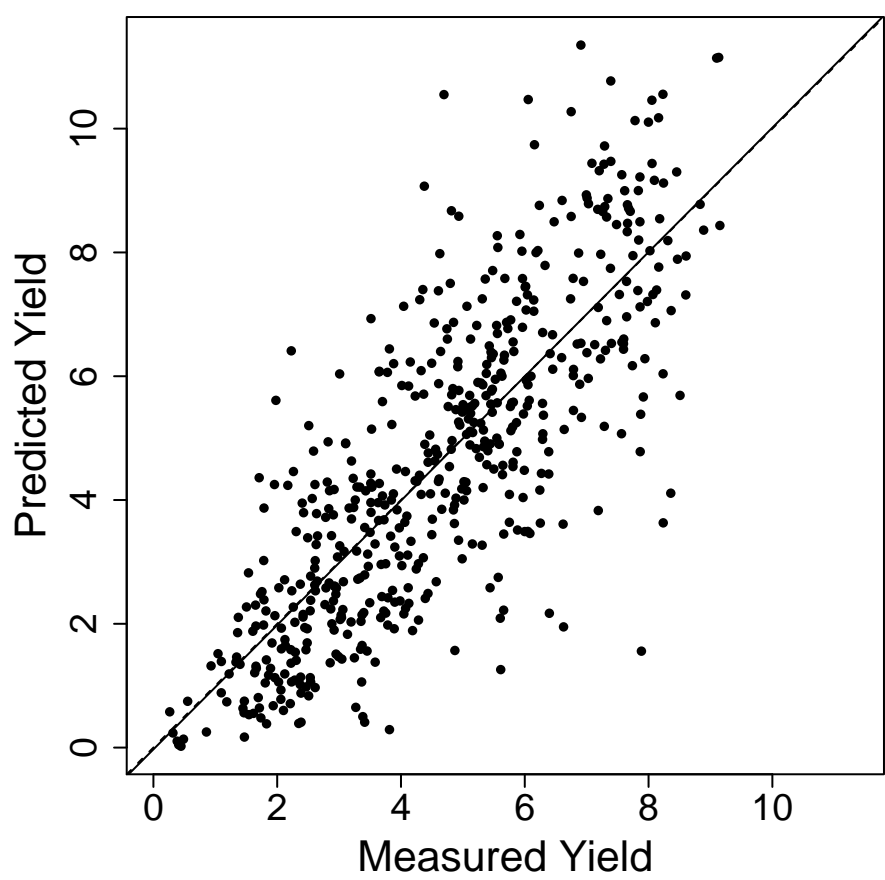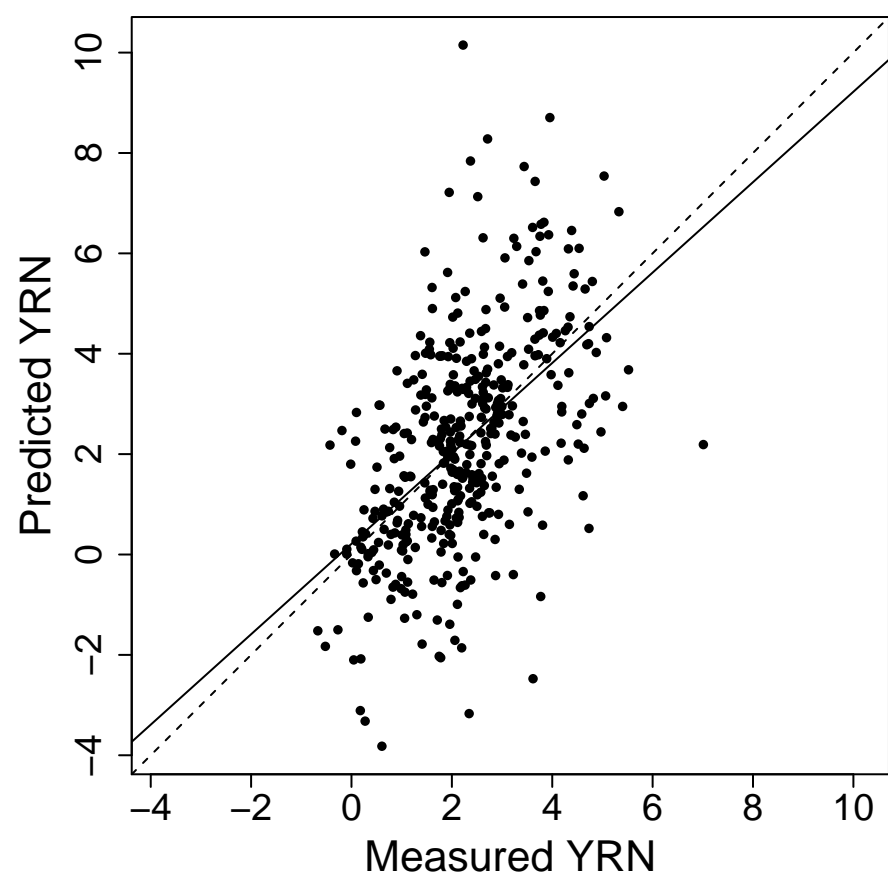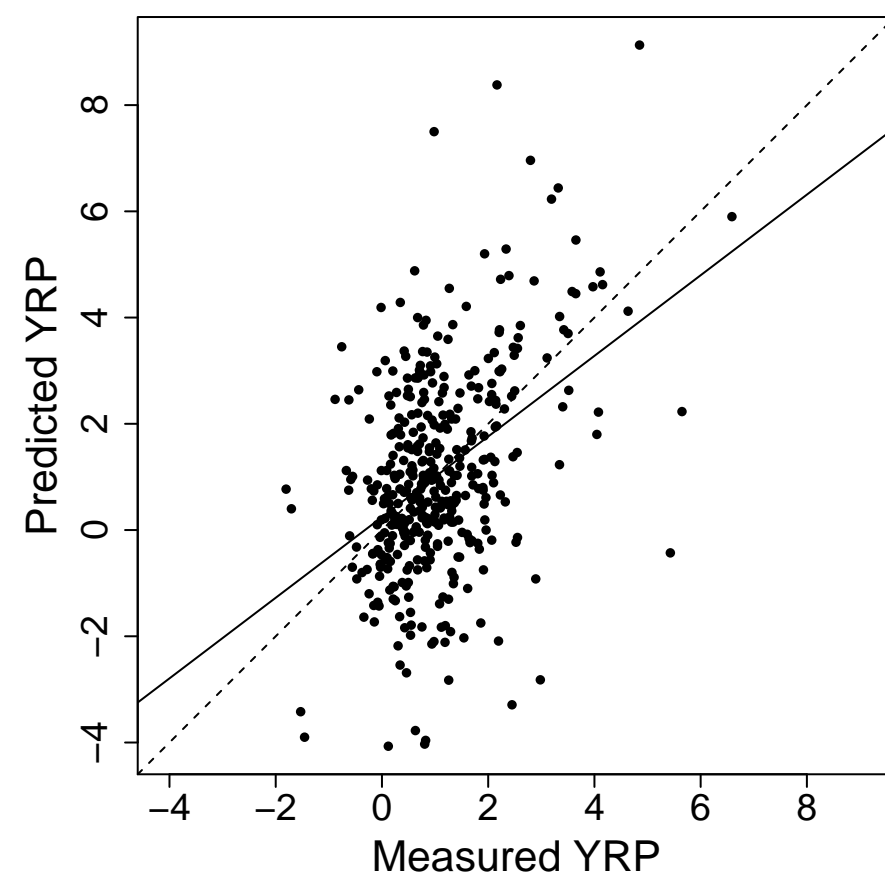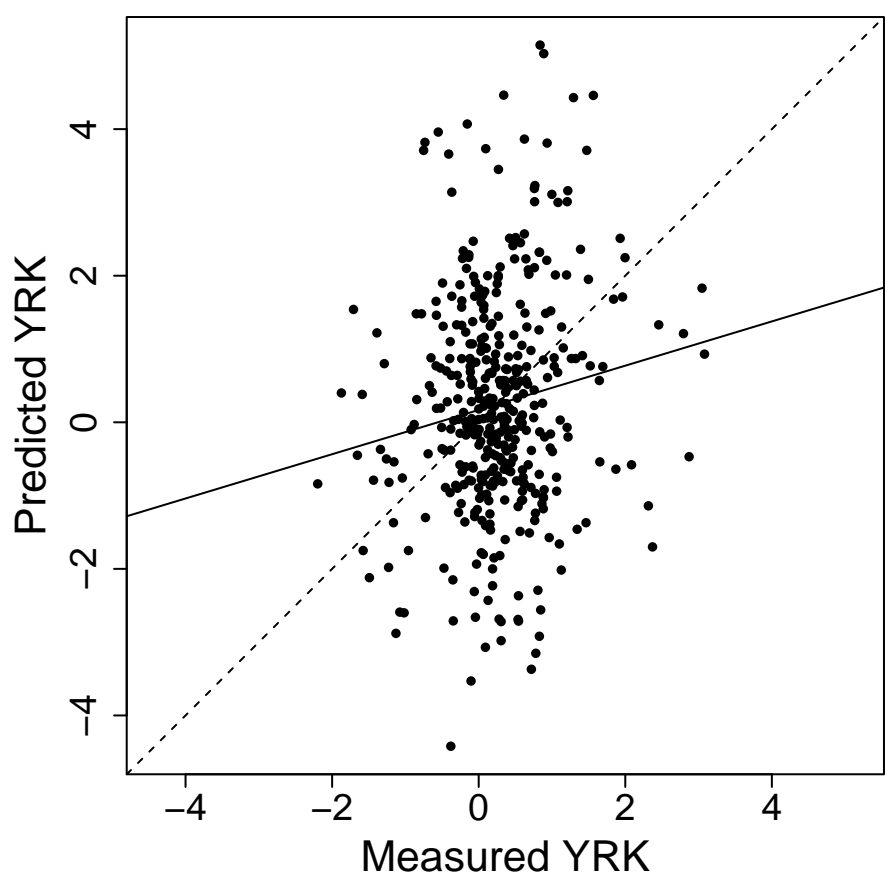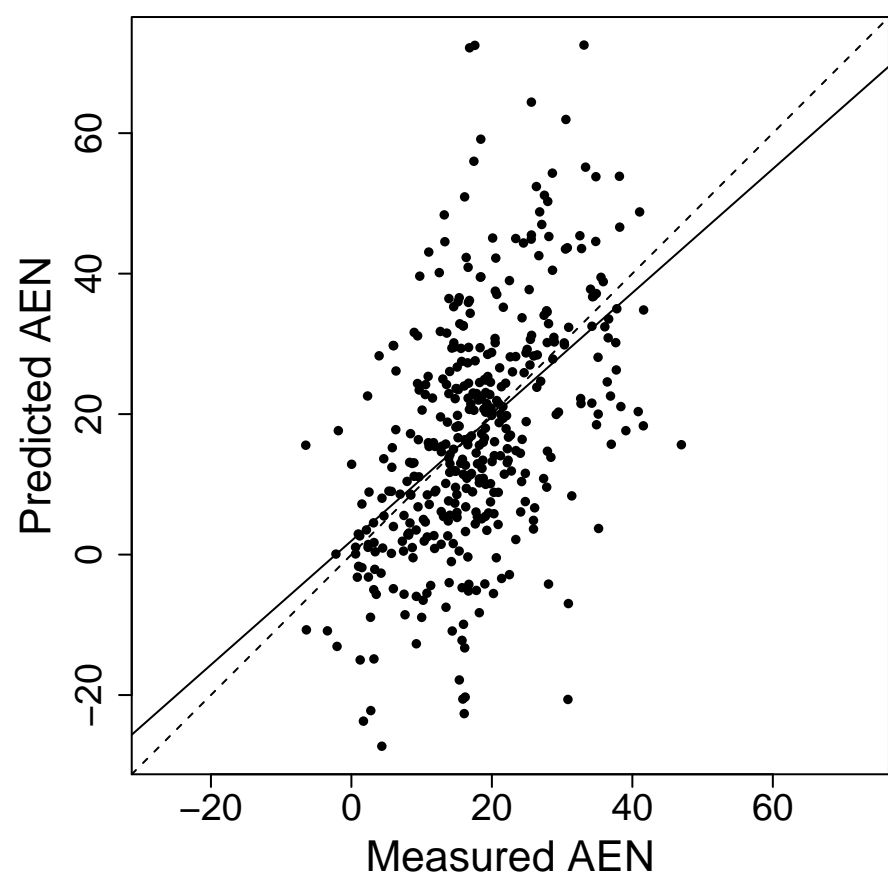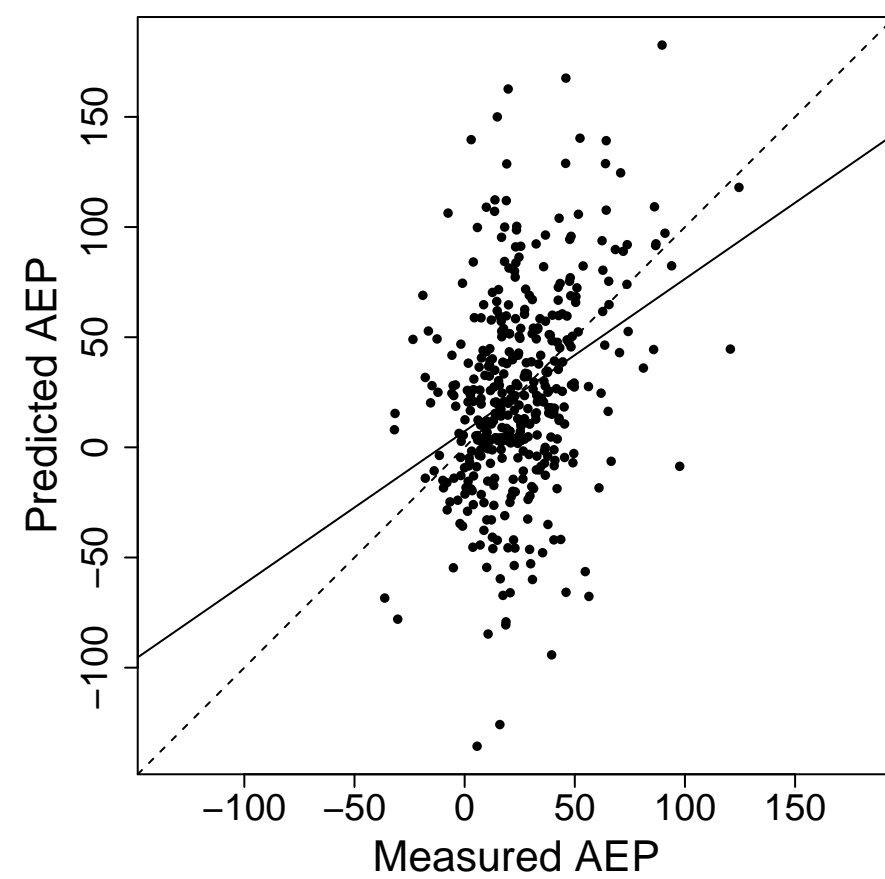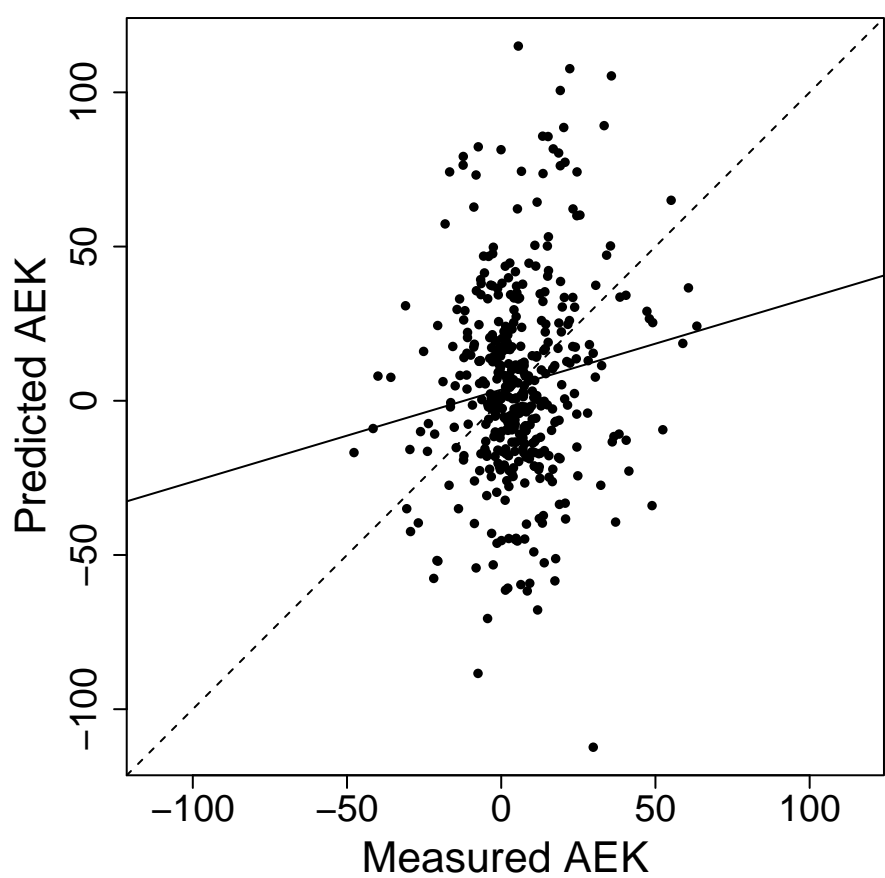

Supplement: MOESM2 [file 13593_2022_821_MOESM2_ESM.pdf]
